# Supplementary material for: Heteroleptic copper(i) complexes [Cu(dmp)(N^P)]BF4 for photoinduced atom-transfer radical addition reactions
Source: Royal Society of Chemistry journal article supplement (doi:10.1039/d3dt00321c), 2023-01-01

# **Heteroleptic copper(I) complexes [Cu(dmp)(N<sup>^</sup>P)]BF<sub>4</sub> for photoinduced atom-transfer radical addition reactions**

You-Hui Zhao,<sup>a</sup> Hai-Yan Li,<sup>a</sup> David James Young,<sup>b</sup> Xiang-Qian Cao,<sup>a</sup> Da-Liang Zhu,<sup>c</sup>  
Zhi-Gang Ren,<sup>a</sup> Hong-Xi Li\*<sup>a</sup>

<sup>a</sup> College of Chemistry, Chemical Engineering and Materials Science, Soochow University, Suzhou 215123, Jiangsu, People's Republic of China.

Email: lihx@suda.edu.cn

<sup>b</sup> Faculty of Science and Technology, Charles Darwin University, Darwin, NT 0909, Australia

<sup>c</sup> School of Chemistry and Environmental Engineering, Analysis and Testing Centre, Yancheng Teachers University, Yancheng 224007, People's Republic of China.

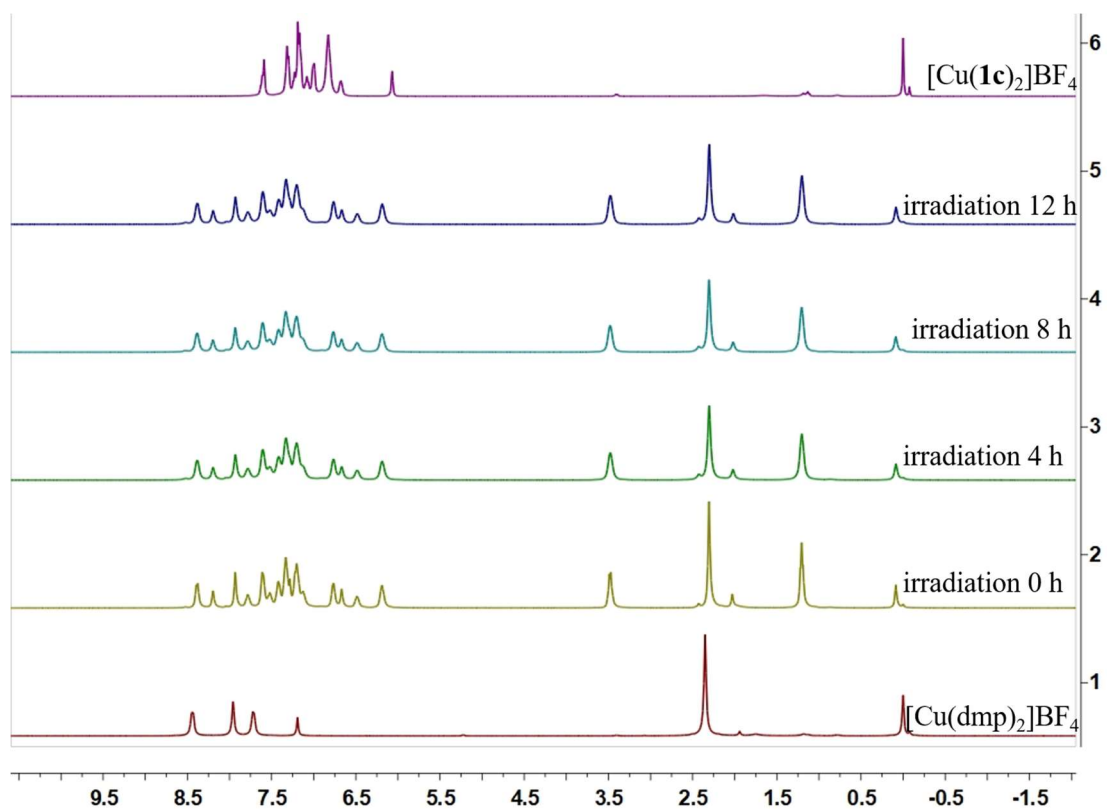

**Fig. S1.**  $^1\text{H}$  NMR of compound **2c** in  $\text{CDCl}_3$  with visible light irradiation time and  $^1\text{H}$  NMR of  $\text{Cu}(\mathbf{1c})_2\text{BF}_4$  and  $\text{Cu}(\text{dmp})_2\text{BF}_4$  in  $\text{CDCl}_3$ .

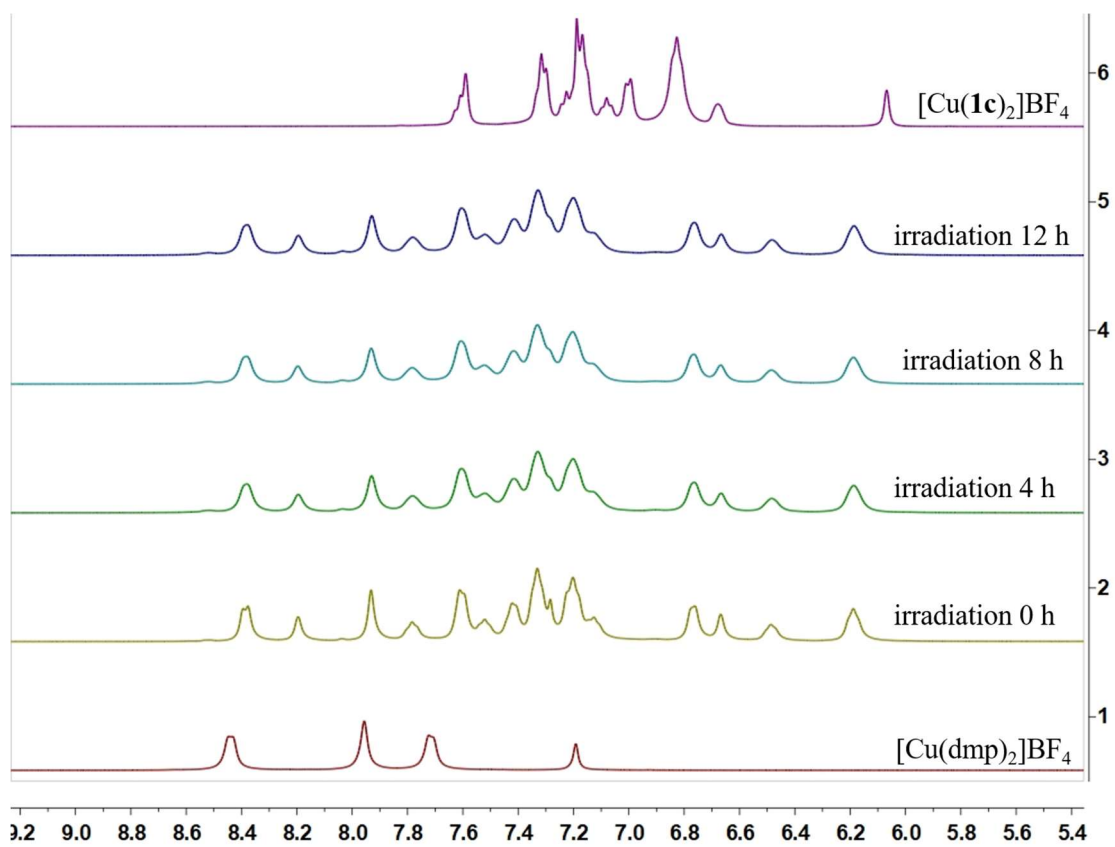

**Fig. S2.** Enlarge of aromatic area of Fig. S1.

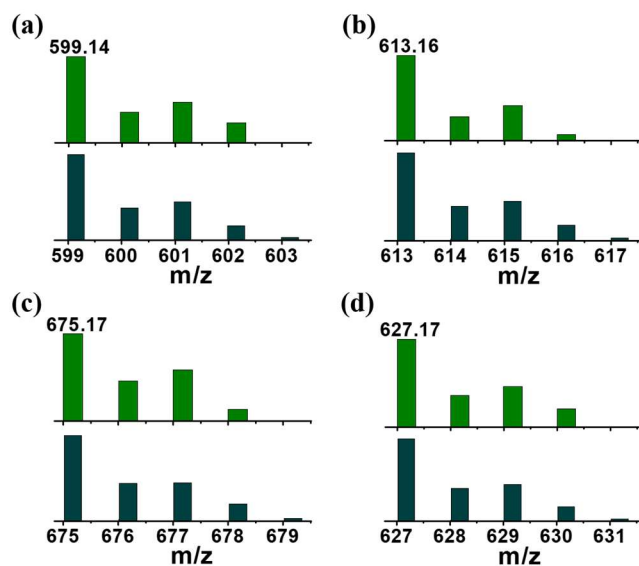

**Fig. S3** The ESI-MS spectra of **2a** (a), **2b** (b), **2c** (c), **2d** (d). The calculated isotope patterns (lower) and observed patterns (upper) of  $[M]^+$  for cations of **2a-2d**.

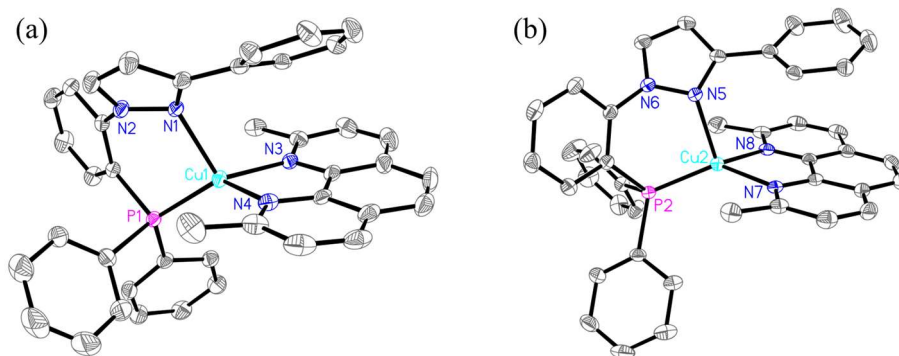

**Fig. S4.** View of two  $[(\text{PhC}_3\text{H}_2\text{N}_2\text{PPh}_3)\text{Cu}(\text{dmp})]^+$  cations (a and b) in **2c** with a labelling scheme and 30% thermal ellipsoids. All H atoms, uncoordinated molecules and  $\text{BF}_4^-$  anions are omitted for clarity.

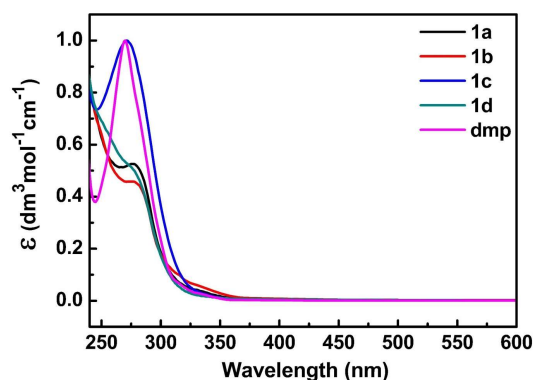

**Fig. S5.** UV/vis absorption spectrum of **1a-1d** and dmp in  $\text{CH}_2\text{Cl}_2$  solution ( $c = 2 \times 10^{-5} \text{ M}$ ) at room temperature.

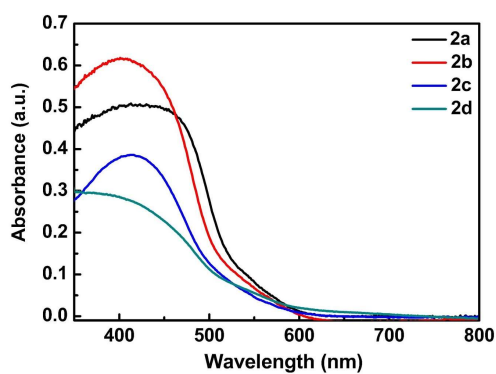

**Fig. S6.** UV/vis absorption spectrum of **2a-2d** in the solid state.

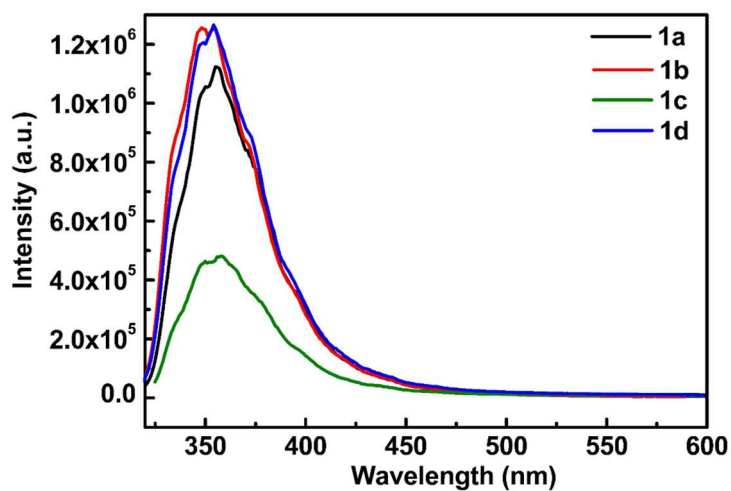

**Fig. S7.** Emission spectra of **1a-1d** measured in  $\text{CH}_2\text{Cl}_2$  solution ( $c = 2 \times 10^{-5} \text{ M}$ ) at room temperature ( $E_x = 305 \text{ nm}$ ).

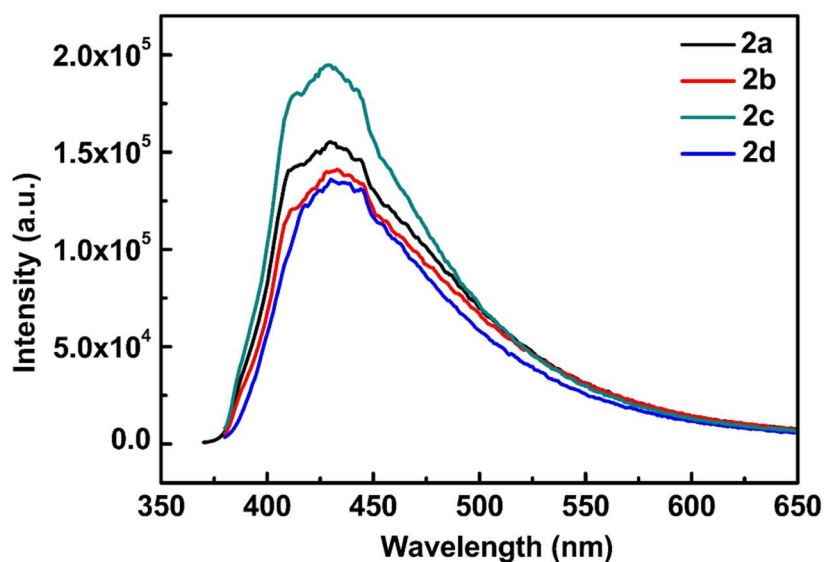

**Fig. S8.** Emission spectra of **2a-2d** measured in  $\text{CH}_2\text{Cl}_2$  solution ( $c = 2 \times 10^{-5} \text{ M}$ ) at room temperature ( $E_x = 400 \text{ nm}$ ).

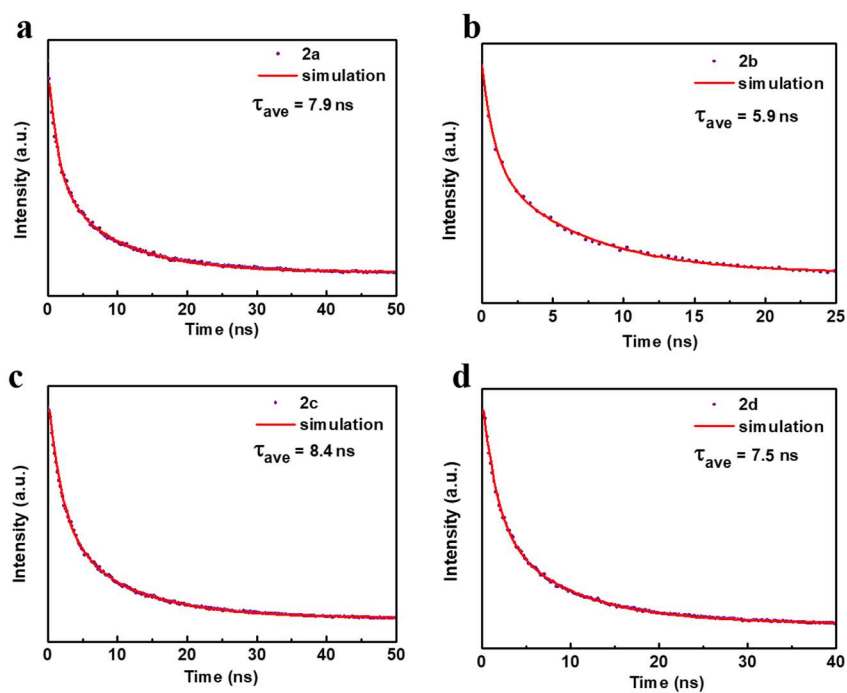

**Fig. S9.** Time dependences of the emission intensity of **2a** (a), **2b** (b), **2c** (c) and **2d** (d) measured at room temperature ( $E_x = 400$  nm) in  $\text{CH}_2\text{Cl}_2$  solution ( $c = 2 \times 10^{-5}$  M).

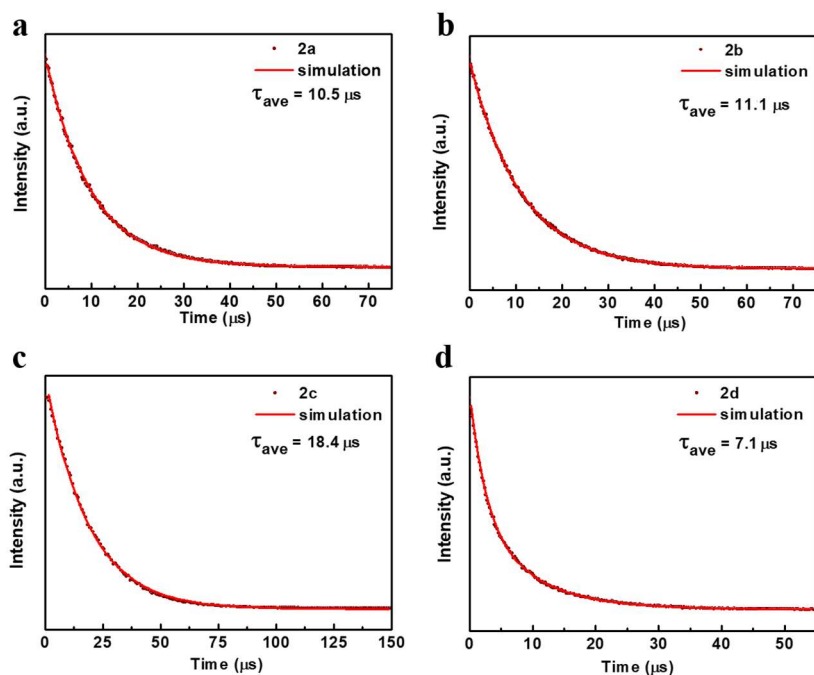

**Fig. S10.** Time dependences of the emission intensity of **2a** (a), **2b** (b), **2c** (c) and **2d** (d) measured at room temperature ( $E_x = 400$  nm) in solid state.

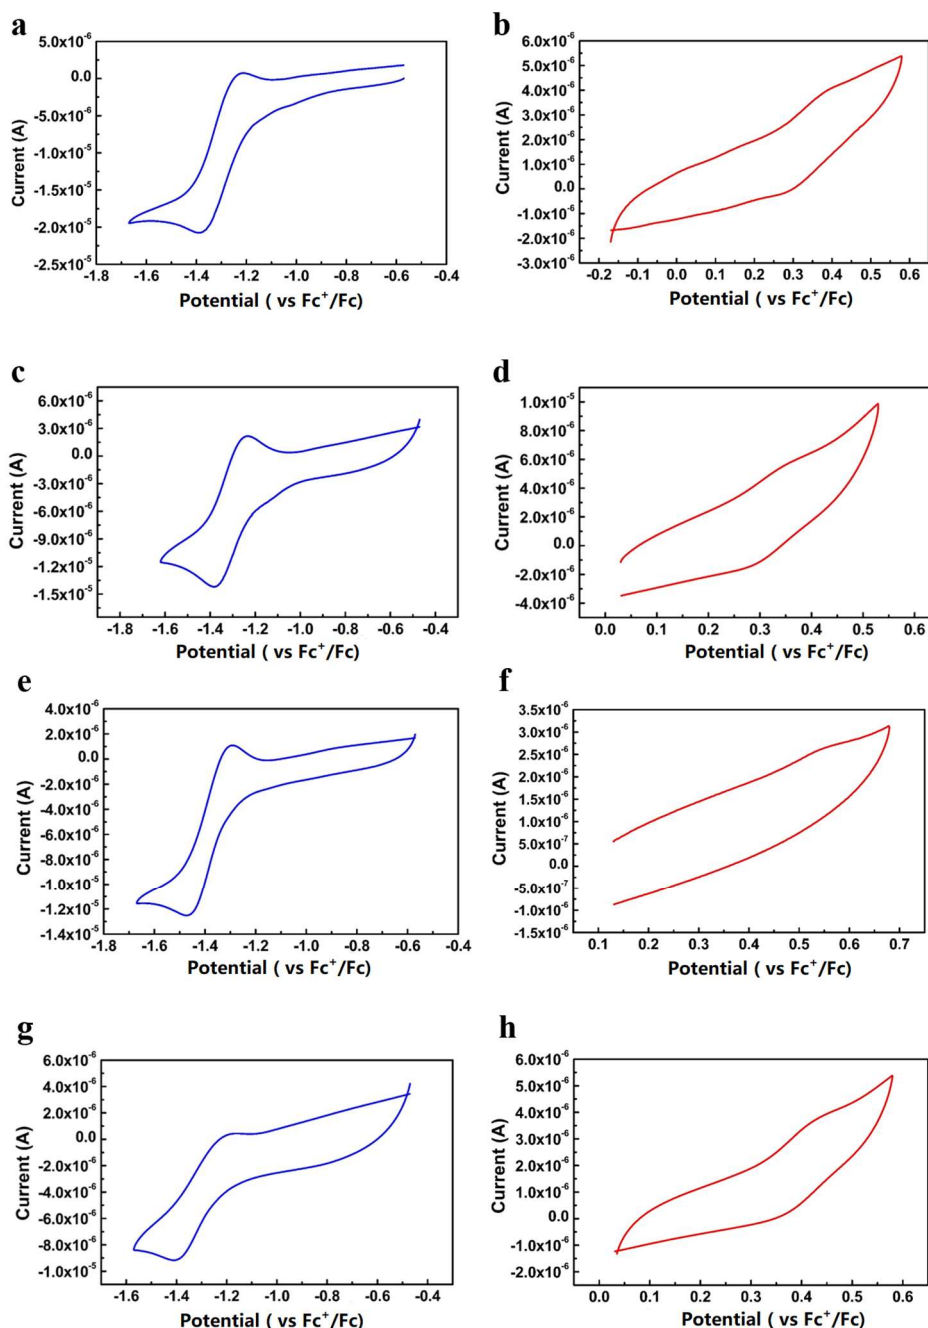

**Fig. S11.** Cyclic voltammograms of **2a** (a, b), **2b** (c, d), **2c** (e, f) and **2d** (g, h) ( $1 \text{ mmol}\cdot\text{L}^{-1}$ ) ( $0.10 \text{ mol}\cdot\text{L}^{-1} \text{ } n\text{Bu}_4\text{NPF}_6/\text{CH}_2\text{Cl}_2$  electrolyte) at  $100 \text{ mV/s}$  scan rate under an argon atmosphere. Working electrode: glassy carbon electrode tip ( $3 \text{ mm}$  diameter); Counter electrode: platinum wire. The excited-state energy  $E_{00}$  ( $1240/521.5 = 2.38 \text{ V}$  (**2a**),  $1240/519.5 = 2.39 \text{ V}$  (**2b**),  $1240/507.6 = 2.44 \text{ V}$  (**2c**),  $1240/528 = 2.35 \text{ V}$  (**2d**)) was obtained from absorption spectra, respectively. The oxidation potential and reduction potential of **\*2a**-**\*2d** were calculated, according to  $E_{\text{ox}}^* = E_{\text{ox}} - E_{00}$ .

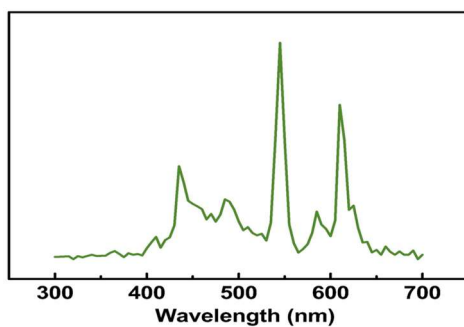

**Fig. S12.** Emission spectrum of 45 W CFL.

### The reaction quantum yield<sup>S1</sup>

$\Phi$  = Mole number for product/Mole number for absorption of photons = 2.38

$$\Phi = \frac{nN_A/t}{fP \lambda / hc}$$

n: the mole number of the product 6; t: reaction time (1800 s);  $N_A$ :  $6.02 \times 10^{23}$ /mol; f:  $1 \cdot 10^{-4}$  (455 nm,  $A = 0.685$ ); P:  $P = E \cdot S$  (E: illumination intensity,  $E = 10.2 \text{ mW/cm}^2$ ; S: the area of irradiation  $S = 1 \text{ cm}^2$ );  $\lambda$ : wavelength ( $\lambda = 4.55 \times 10^{-7} \text{ m}$ ); h: planck constant ( $h = 6.626 \times 10^{-34} \text{ J}\cdot\text{s}$ ); c: velocity of light ( $c = 3 \times 10^8 \text{ m/s}$ ).

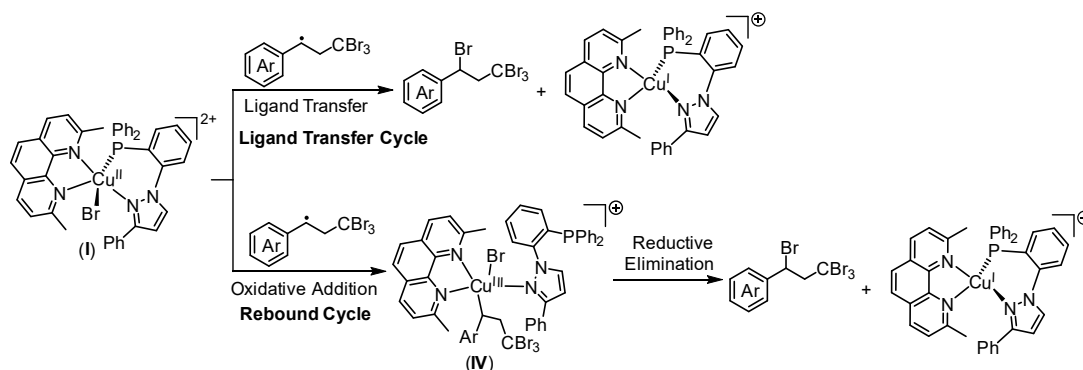

**Scheme S1** Possible mechanistic pathways of ligand transfer cycle and rebound cycle.

## Characterization Data

### 1-(2-(Diphenylphosphanyl)phenyl)-1H-pyrazole (**1a**)<sup>S2</sup>

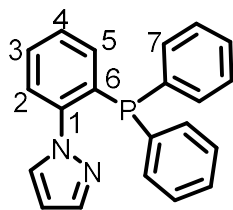

Anal. Calcd. for C<sub>21</sub>H<sub>17</sub>N<sub>2</sub>P: C, 76.82; H, 5.22; N, 8.53%. Found: C, 76.74; H, 5.31; N, 8.74%.

<sup>1</sup>H NMR (400 MHz, CDCl<sub>3</sub>, ppm): δ = 7.59 (m, 1H), 7.50 – 7.40 (m, 3H), 7.35 – 7.25 (m, 11H), 7.02 (dd, <sup>3</sup>J<sub>HH</sub> = 7.3, <sup>4</sup>J<sub>HH</sub> = 3.1 Hz, 1H, H5), 6.25 (m, 1H).

<sup>13</sup>C{<sup>1</sup>H} NMR (101 MHz, CDCl<sub>3</sub>, ppm): δ = 144.6 (d, <sup>2</sup>J<sub>CP</sub> = 21.2 Hz, C1), 140.4, 136.6 (d, <sup>1</sup>J<sub>CP</sub> = 11.2 Hz, C6), 134.8, 133.9 (d, <sup>2</sup>J<sub>CP</sub> = 20.5 Hz, C7), 131.2 (d, <sup>3</sup>J<sub>CP</sub> = 5.3 Hz, C2), 129.7, 128.9, 128.8, 128.6 (d, <sup>3</sup>J<sub>CP</sub> = 7.2 Hz, C4), 128.2, 126.3 (d, <sup>4</sup>J<sub>CP</sub> = 2.6 Hz, C3), 106.3.

<sup>31</sup>P NMR (162 MHz, CDCl<sub>3</sub>, ppm): δ = -14.5.

HRMS (ESI) *m/z* [M + Na]<sup>+</sup> Calcd for C<sub>21</sub>H<sub>17</sub>N<sub>2</sub>NaP<sup>+</sup> 351.1022; Found 351.1062.

IR (KBr, ν, selected peak, cm<sup>-1</sup>): 1590, 1472, 1432, 1390, 1328, 1192, 1159, 1076, 1043, 1019, 932, 848, 745, 695.

### (1,3,3,3-Tetrabromopropyl)benzene (**5a**)<sup>S3</sup>

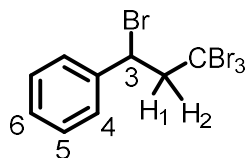

Following the general procedure, **5a** as a white solid was obtained from flash column chromatography using PE as an eluent. Yield: 78.6 mg, 91%. m.p. 62-64 °C.

<sup>1</sup>H NMR (400 MHz, CDCl<sub>3</sub>, ppm): δ = 7.49 (m, 2H), 7.37 (m, 2H), 7.31 (t, <sup>3</sup>J<sub>HH</sub> = 7.2 Hz, 1H, H6), 5.33 (dd, <sup>3</sup>J<sub>HH</sub> = 7.7, <sup>3</sup>J<sub>HH</sub> = 4.1 Hz, 1H, H3), 4.12 (dd, <sup>2</sup>J<sub>HH</sub> = 15.6, <sup>3</sup>J<sub>HH</sub> = 4.1 Hz, 1H, H2), 4.05 (dd, <sup>2</sup>J<sub>HH</sub> = 15.6, <sup>3</sup>J<sub>HH</sub> = 7.7 Hz, 1H, H1).

<sup>13</sup>C{<sup>1</sup>H} NMR (101 MHz, CDCl<sub>3</sub>, ppm): δ = 140.8, 129.0, 128.9, 128.2, 66.5, 50.1, 35.0.

HRMS (ESI) *m/z* [M]<sup>+</sup> Calcd for C<sub>9</sub>H<sub>8</sub>Br<sub>4</sub><sup>+</sup> 431.7360; Found 431.7369.

### 1-Fluoro-4-(1,3,3,3-tetrabromopropyl)benzene (**5b**)<sup>S3</sup>

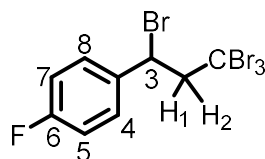



Following the general procedure, **5b** as a colorless oil was obtained from flash column chromatography using PE as an eluent. Yield: 62.1 mg, 69%.

$^1\text{H}$  NMR (400 MHz,  $\text{CDCl}_3$ , ppm):  $\delta$  = 7.48 (dd,  $^3J_{\text{HH}} = 8.7$ ,  $^3J_{\text{FH}} = 5.2$  Hz, 2H, H5 or H7), 7.06 (m, 2H), 5.34 (dd,  $^3J_{\text{HH}} = 8.4$ ,  $^3J_{\text{HH}} = 3.8$  Hz, 1H, H3), 4.10 (dd,  $^2J_{\text{HH}} = 15.5$ ,  $^3J_{\text{HH}} = 3.8$  Hz, 1H, H2), 4.01 (dd,  $^2J_{\text{HH}} = 15.5$ ,  $^3J_{\text{HH}} = 8.4$  Hz, 1H, H1).

$^{13}\text{C}\{^1\text{H}\}$  NMR (101 MHz,  $\text{CDCl}_3$ , ppm):  $\delta$  = 162.8 (d,  $^1J_{\text{CF}} = 248.9$  Hz, C6), 136.6, 130.1 (d,  $^3J_{\text{CF}} = 8.6$  Hz, C4), 115.9 (d,  $^2J_{\text{CF}} = 21.9$  Hz, C5), 66.5, 49.1, 34.7.

$^9\text{F}$  NMR (377 MHz,  $\text{CDCl}_3$ , ppm):  $\delta$  = -112.0.

HRMS (ESI)  $m/z$   $[\text{M}]^+$  Calcd for  $\text{C}_9\text{H}_7\text{Br}_4\text{F}^+$  449.7265; Found 449.7272.

### 1-Chloro-4-(1,3,3,3-tetrabromopropyl)benzene (**5c**)<sup>S3</sup>

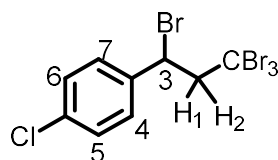

Following the general procedure, **5c** as a white solid was obtained from flash column chromatography using PE as an eluent. Yield: 83.5 mg, 90%. m.p. 69-74 °C.

$^1\text{H}$  NMR (400 MHz,  $\text{CDCl}_3$ , ppm):  $\delta$  = 7.43 (d,  $^3J_{\text{HH}} = 8.5$  Hz, 2H, H5 or H6), 7.34 (d,  $^3J_{\text{HH}} = 8.5$  Hz, 2H, H4 or H7), 5.31 (dd,  $^3J_{\text{HH}} = 8.3$ ,  $^3J_{\text{HH}} = 3.8$  Hz, 1H, H3), 4.10 (dd,  $^2J_{\text{HH}} = 15.5$ ,  $^3J_{\text{HH}} = 3.8$  Hz, 1H, H2), 4.01 (dd,  $^2J_{\text{HH}} = 15.5$ ,  $^3J_{\text{HH}} = 8.3$  Hz, 1H, H1).

$^{13}\text{C}\{^1\text{H}\}$  NMR (101 MHz,  $\text{CDCl}_3$ , ppm):  $\delta$  = 139.2, 134.8, 129.6, 129.1, 66.3, 48.9, 34.6.

HRMS (ESI)  $m/z$   $[\text{M}]^+$  Calcd for  $\text{C}_9\text{H}_7\text{Br}_4\text{Cl}^+$  465.6970; Found 465.6968.

### 1-Bromo-4-(1,3,3,3-tetrabromopropyl)benzene (**5d**)<sup>S3</sup>

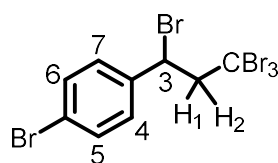

Following the general procedure, **5d** as a white solid was obtained from flash column chromatography using PE as an eluent. Yield: 50.5 mg, 50%. m.p. 88-95 °C.

$^1\text{H}$  NMR (400 MHz,  $\text{CDCl}_3$ , ppm):  $\delta$  = 7.43 (d,  $^3J_{\text{HH}} = 8.5$  Hz, 2H, H5 or H6), 7.34 (d,  $^3J_{\text{HH}} = 8.5$  Hz, 2H, H4 or H7), 5.31 (dd,  $^3J_{\text{HH}} = 8.3$ ,  $^3J_{\text{HH}} = 3.8$  Hz, 1H, H3), 4.10 (dd,  $^2J_{\text{HH}} = 15.5$ ,  $^3J_{\text{HH}} = 3.8$  Hz, 1H, H2), 4.01 (dd,  $^2J_{\text{HH}} = 15.5$ ,  $^3J_{\text{HH}} = 8.3$  Hz, 1H, H1).

$^{13}\text{C}\{^1\text{H}\}$  NMR (101 MHz,  $\text{CDCl}_3$ , ppm):  $\delta$  = 139.7, 132.1, 129.9, 123.0, 66.2, 48.9, 34.6.

HRMS (ESI)  $m/z$   $[\text{M}]^+$  Calcd for  $\text{C}_9\text{H}_7\text{Br}_5^+$  509.6465; Found 509.6469.

### 1-Nitro-4-(1,3,3,3-tetrabromopropyl)benzene (**5g**)<sup>S4</sup>

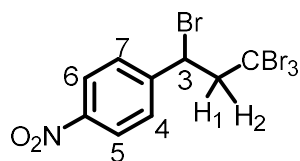

Following the general procedure, **5g** as a white solid was obtained from flash column chromatography using PE as an eluent. Yield: 26.7 mg, 28%. m.p. 88-91 °C.

<sup>1</sup>H NMR (400 MHz, CDCl<sub>3</sub>, ppm): δ = 8.24 (d, <sup>3</sup>J<sub>HH</sub> = 8.7 Hz, 2H, H5 or H6), 7.68 (d, <sup>3</sup>J<sub>HH</sub> = 8.7 Hz, 2H, H4 or H7), 5.38 (dd, <sup>3</sup>J<sub>HH</sub> = 8.5, <sup>3</sup>J<sub>HH</sub> = 3.7 Hz, 1H, H3), 4.15 (dd, <sup>2</sup>J<sub>HH</sub> = 15.6, <sup>3</sup>J<sub>HH</sub> = 3.7 Hz, 1H, H2), 4.05 (dd, <sup>2</sup>J<sub>HH</sub> = 15.5, <sup>3</sup>J<sub>HH</sub> = 8.5 Hz, 1H, H1).

<sup>13</sup>C{<sup>1</sup>H} NMR (101 MHz, CDCl<sub>3</sub>, ppm): δ = 147.9, 147.5, 129.3, 124.2, 66.0, 47.4, 34.0.

HRMS (ESI) *m/z* [M]<sup>+</sup> Calcd for C<sub>9</sub>H<sub>7</sub>Br<sub>4</sub>NO<sub>2</sub><sup>+</sup> 476.7210; Found 476.7218.

### (1-Bromo-3,3,3-trichloropropyl)benzene (**5k**)<sup>S5</sup>

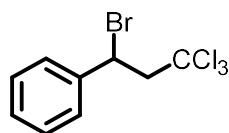

Following the general procedure, **5k** as a colorless oil was obtained from flash column chromatography using PE as an eluent. Yield: 37.2 mg, 62%.

<sup>1</sup>H NMR (400 MHz, CDCl<sub>3</sub>, ppm): δ = 7.47–7.43 (m, 2H), 7.39–7.33 (m, 2H), 7.31 (m, 1H), 5.37 (m, 1H), 3.75 (m, 2H).

<sup>13</sup>C{<sup>1</sup>H} NMR (101 MHz, CDCl<sub>3</sub>, ppm): δ = 140.8, 128.9, 127.8, 127.4, 96.5, 62.6, 47.5.

HRMS (EI) *m/z* [M]<sup>+</sup> Calcd for C<sub>9</sub>H<sub>8</sub>BrCl<sub>3</sub><sup>+</sup> 299.8875; Found 299.8881.

### References

- S1 K. Zhang, L.-Q. Lu, Y. Jia, Y. Wang, F.-D. Lu, F. Pan and W.-J. Xiao, *Angew. Chem. Int. Ed.*, 2019, **58**, 13375–13379.
- S2 J.-H. Jia, X.-L. Chen, J.-Z. Liao, D. Liang, M.-X. Yang, R. Yu and C.-Z. Lu, *Dalton Trans.*, 2019, **48**, 1418–1426.
- S3 K. Matsuo, E. Yamaguchi, A. Itoh, *J. Org. Chem.*, 2020, **85**, 10574-10583.
- S4 C. X. Song, P. Chen and Y. Tang, *RSC Adv.*, 2017, **7**, 11233-112.
- S6 Q. Yao and C. J. Li, *Chem. Commun.*, 2017, **53**, 11225-11228.

## NMR spectra

**Fig. S13.** The  $^1\text{H}$  (400 MHz),  $^{13}\text{C}\{^1\text{H}\}$  (101 MHz),  $^{31}\text{P}$  (162 MHz) and  $^{19}\text{F}$  (377 MHz) NMR spectra for (2-fluorophenyl)diphenylphosphane in  $\text{CDCl}_3$ .

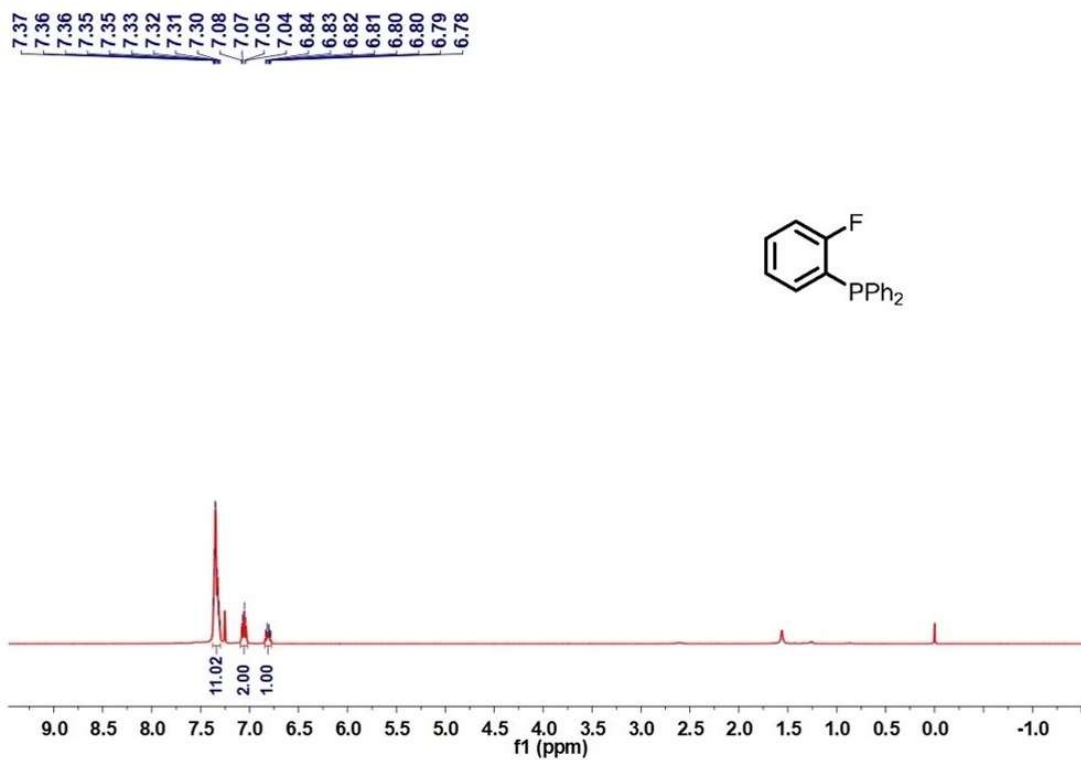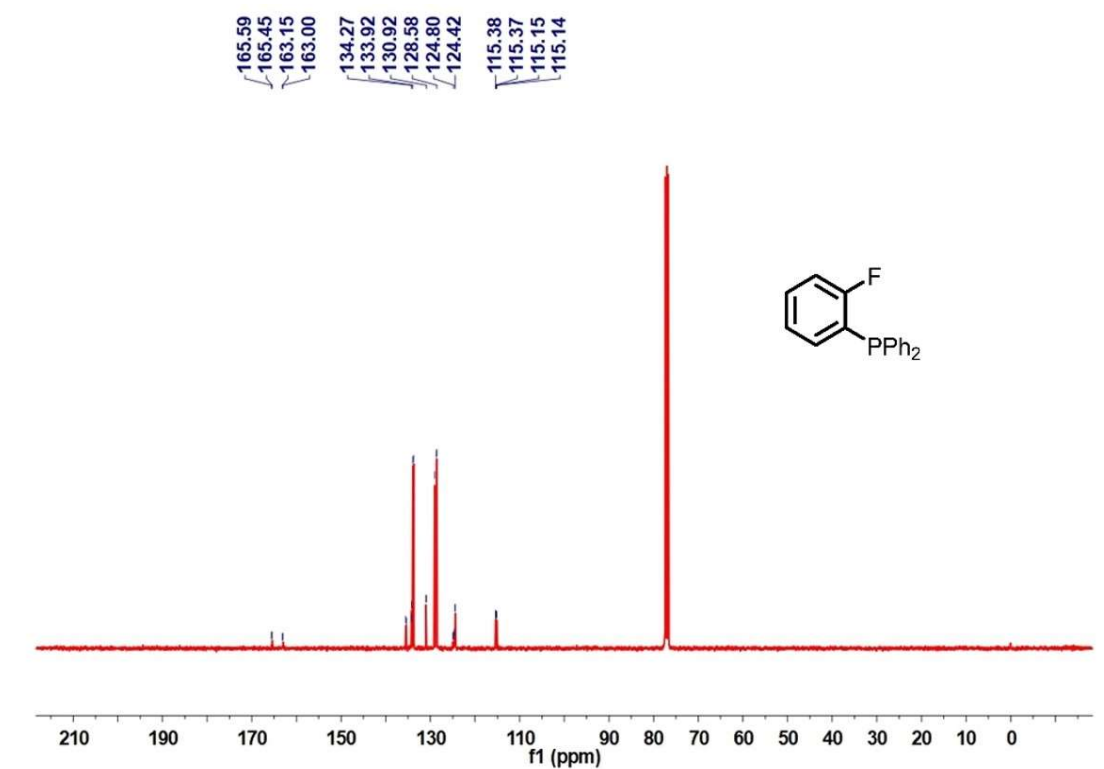

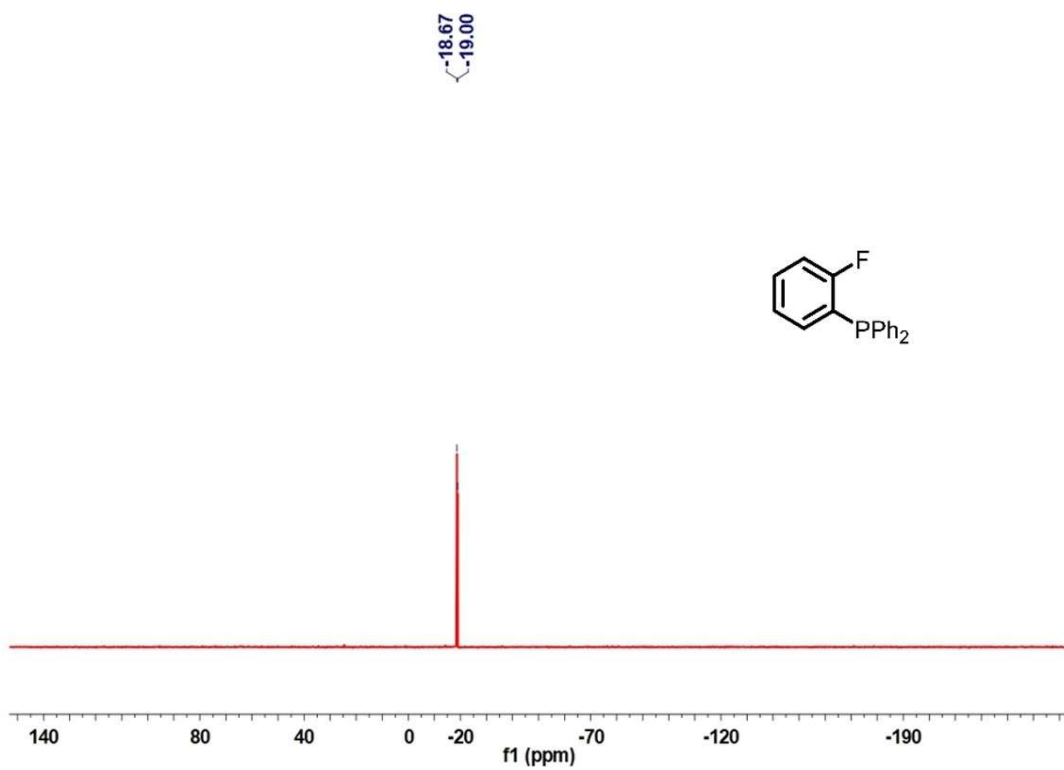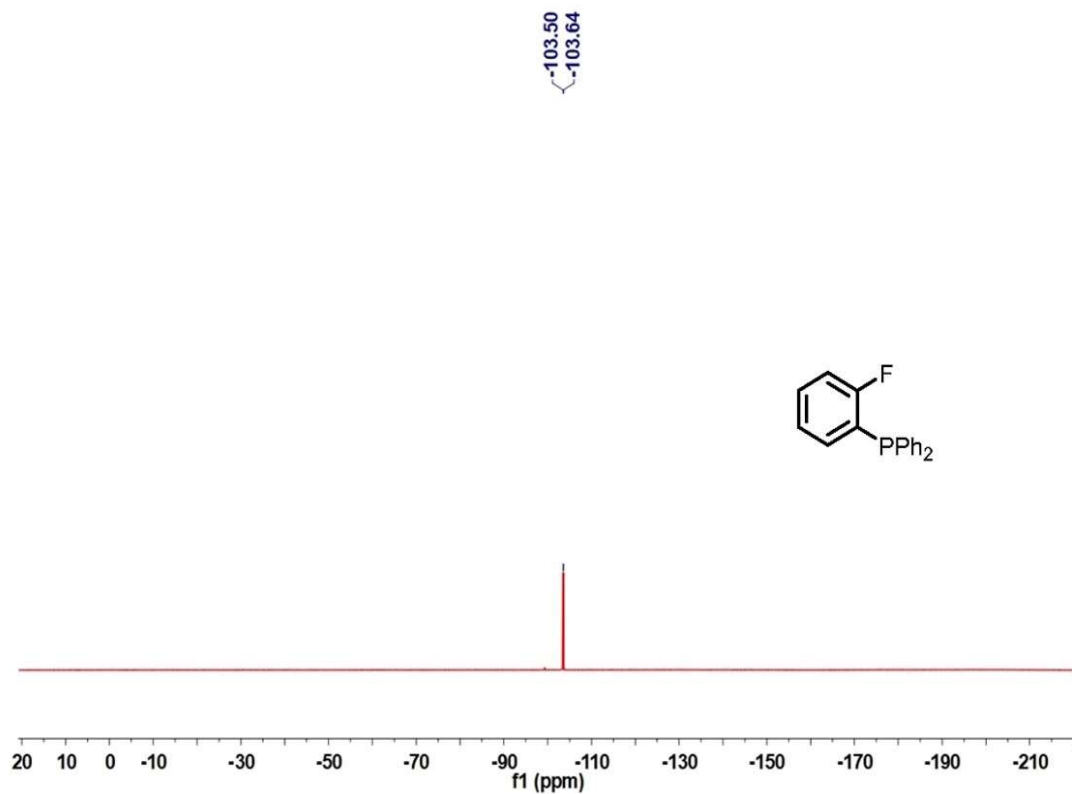

**Fig. S14.** The  $^1\text{H}$  (400 MHz),  $^{13}\text{C}\{^1\text{H}\}$  (101 MHz) and  $^{31}\text{P}$  (162 MHz) NMR spectra for 1-(2-(diphenylphosphanyl)phenyl)-1H-pyrazole (**1a**) in  $\text{CDCl}_3$  and  $^{31}\text{P}$  (162 MHz) NMR spectra in  $d_6$ -DMSO.

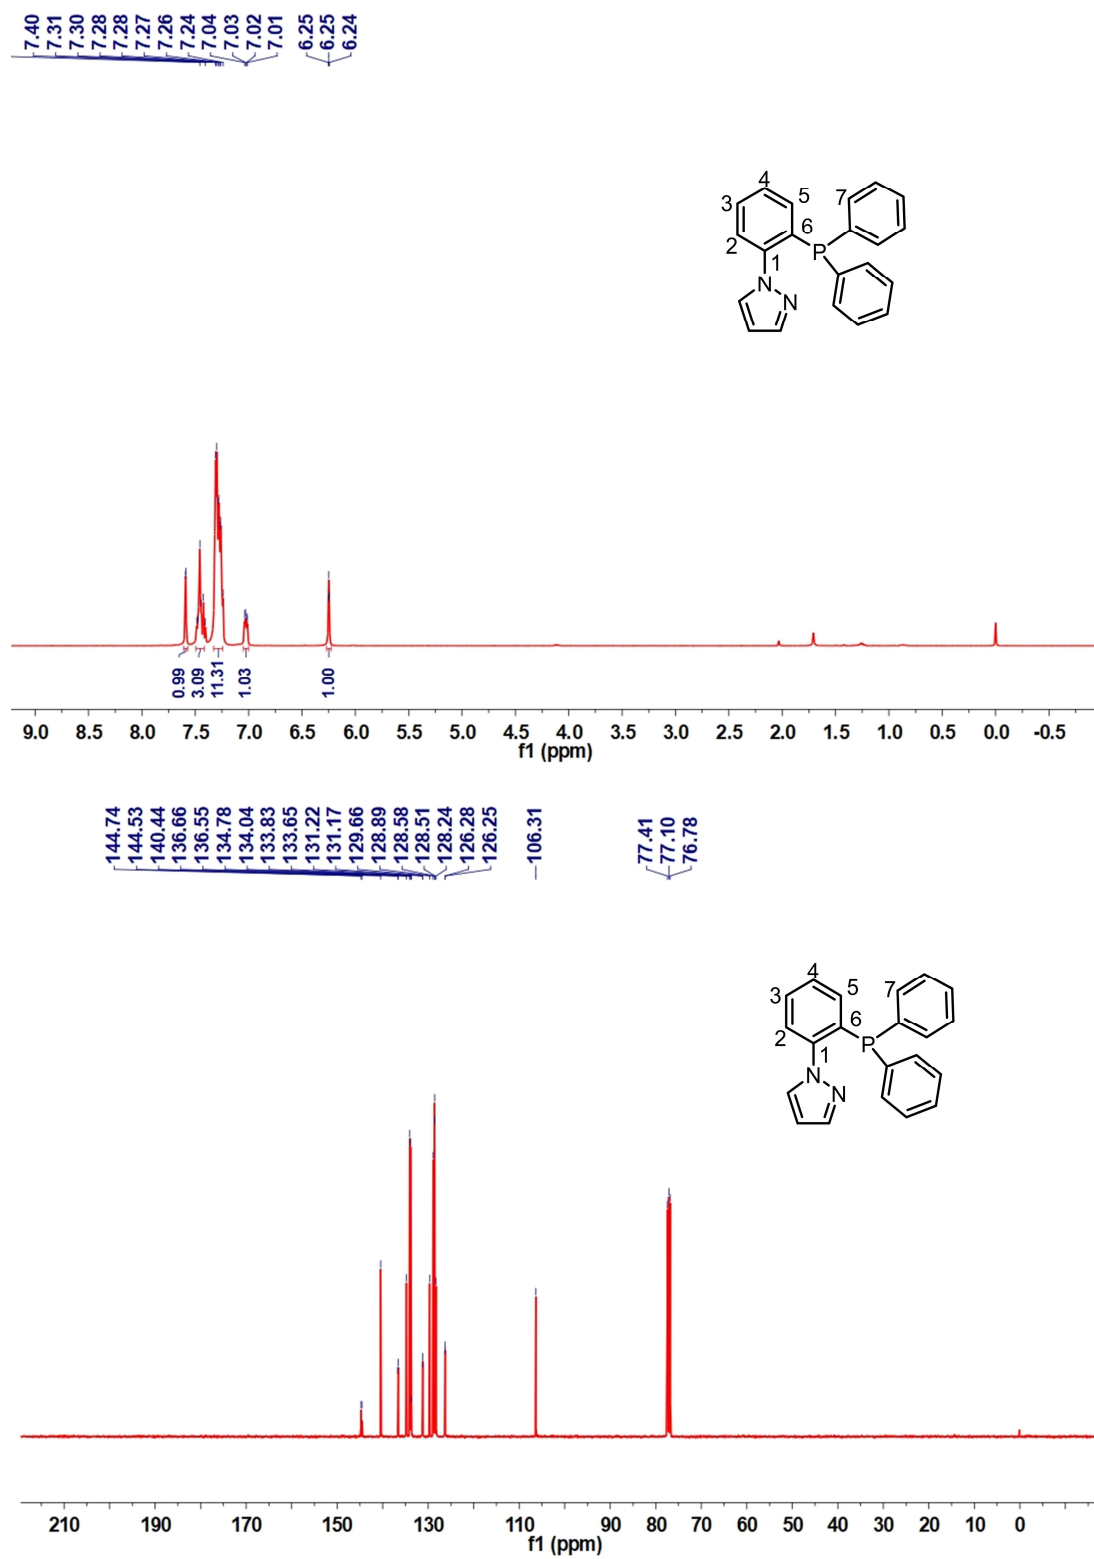

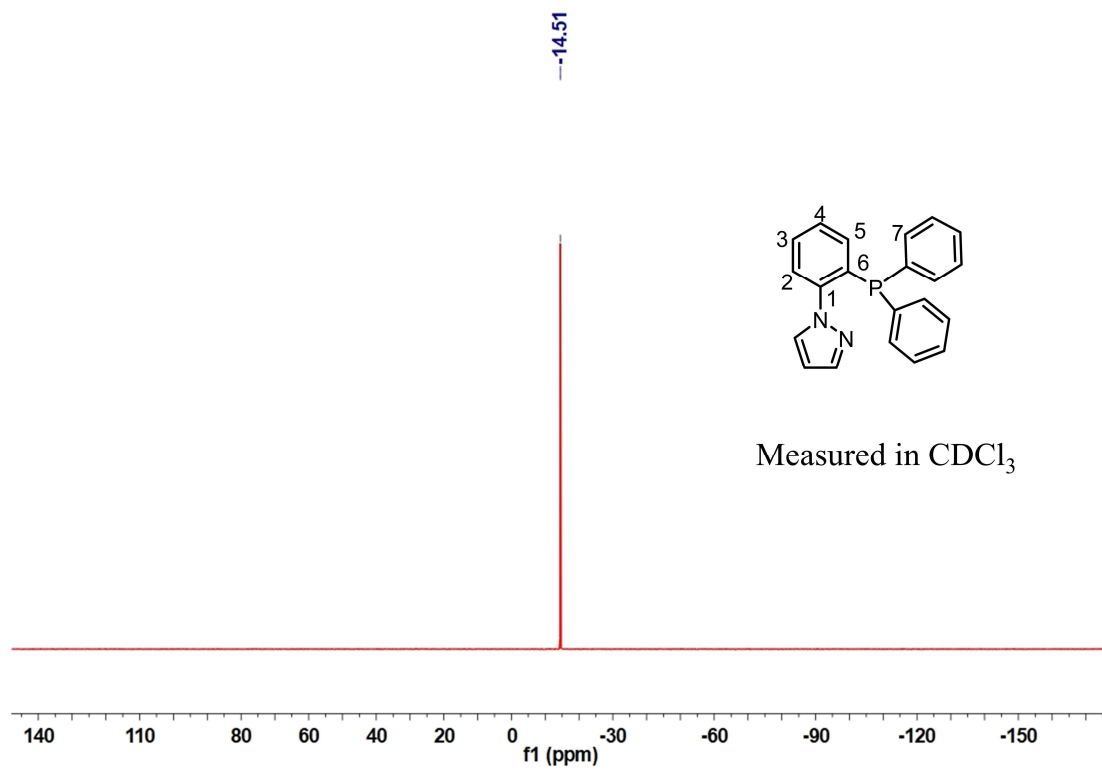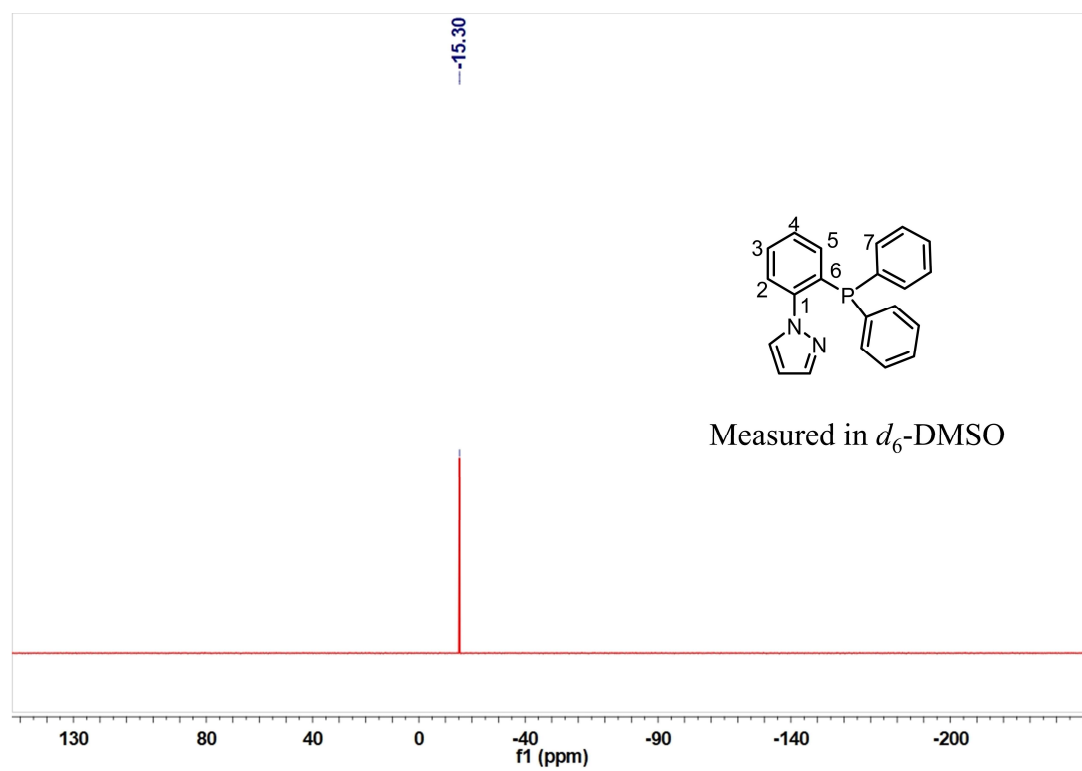

**Fig. S15.** The  $^1\text{H}$  (400 MHz),  $^{13}\text{C}\{^1\text{H}\}$  (101 MHz) and  $^{31}\text{P}$  (162 MHz) NMR spectra for 1-(2-(diphenylphosphanyl)phenyl)-3-methyl-1H-pyrazole (**1b**) in  $\text{CDCl}_3$  and  $^{31}\text{P}$  (162 MHz) NMR spectra in  $d_6$ -DMSO.

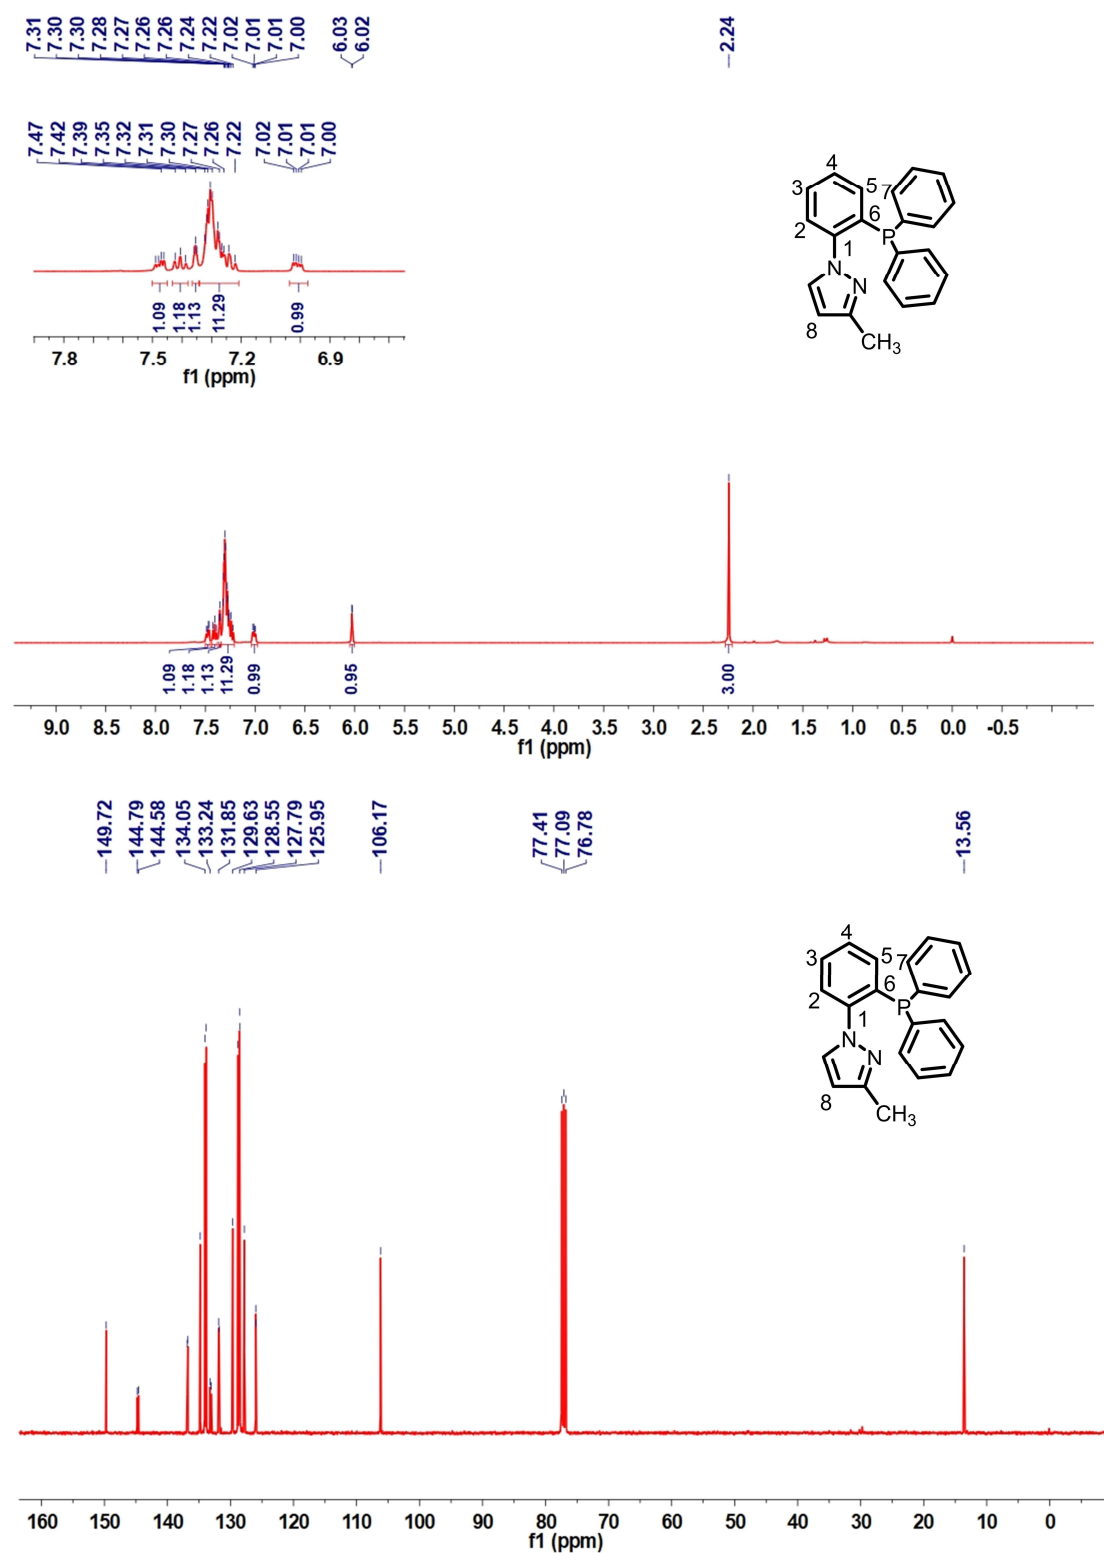

-14.41

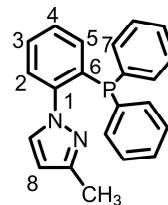

Measured in CDCl<sub>3</sub>

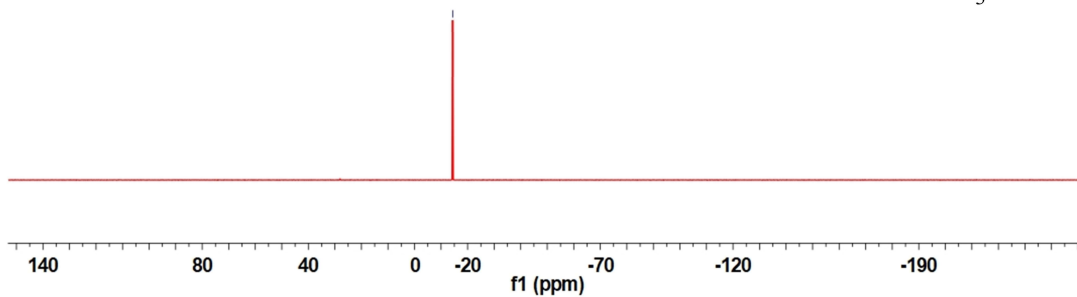

-14.73

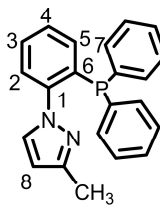

Measured in *d*<sub>6</sub>-DMSO

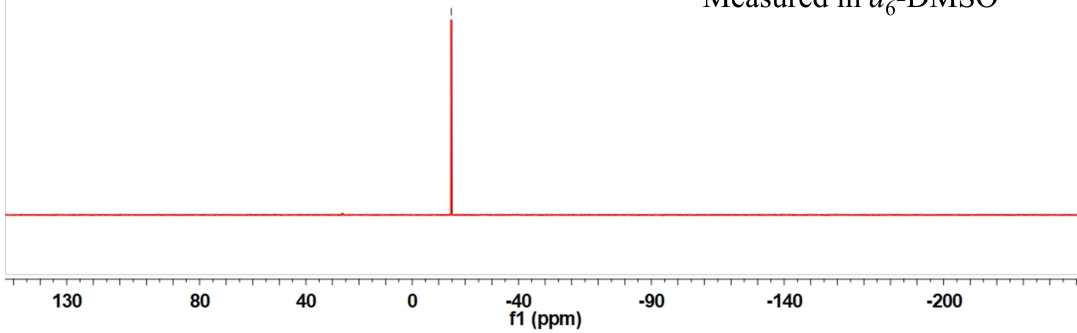



**Fig. S16.** The  $^1\text{H}$  (400 MHz),  $^{13}\text{C}\{^1\text{H}\}$  (101 MHz) and  $^{31}\text{P}$  (162 MHz) NMR spectra for 1-(2-(diphenylphosphanyl)phenyl)-3-phenyl-1H-pyrazole (**1c**) in  $\text{CDCl}_3$  and  $^{31}\text{P}$  (162 MHz) NMR spectra in  $d_6$ -DMSO.

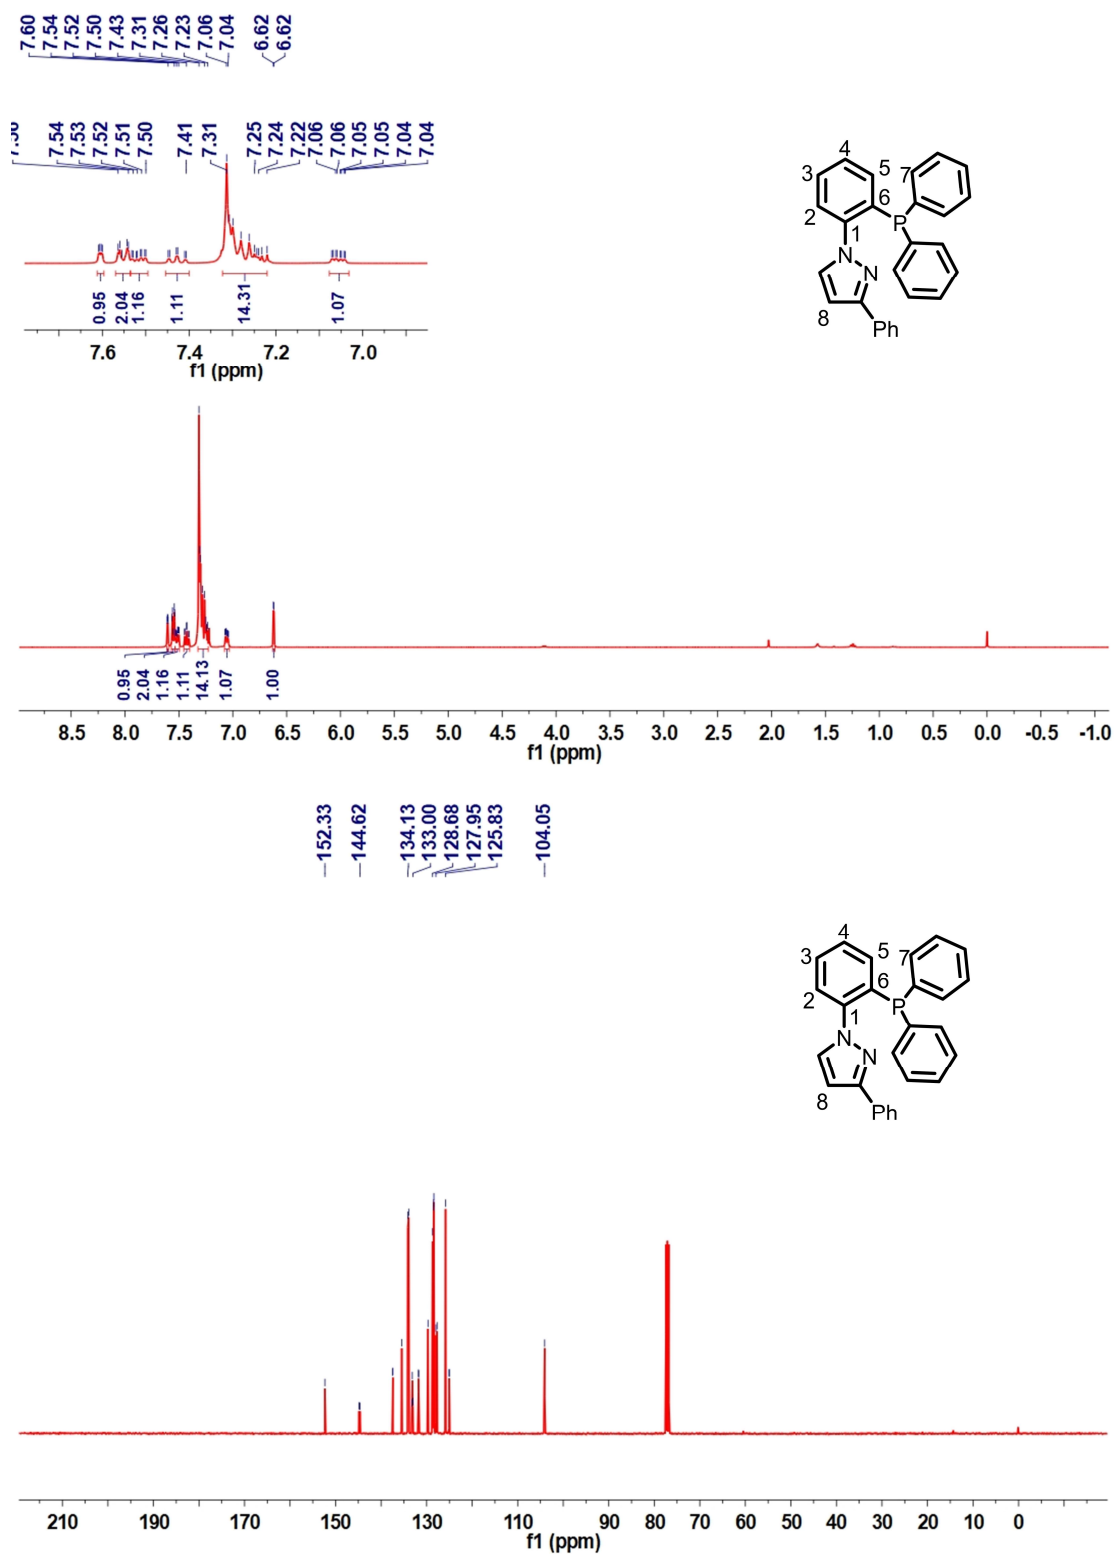

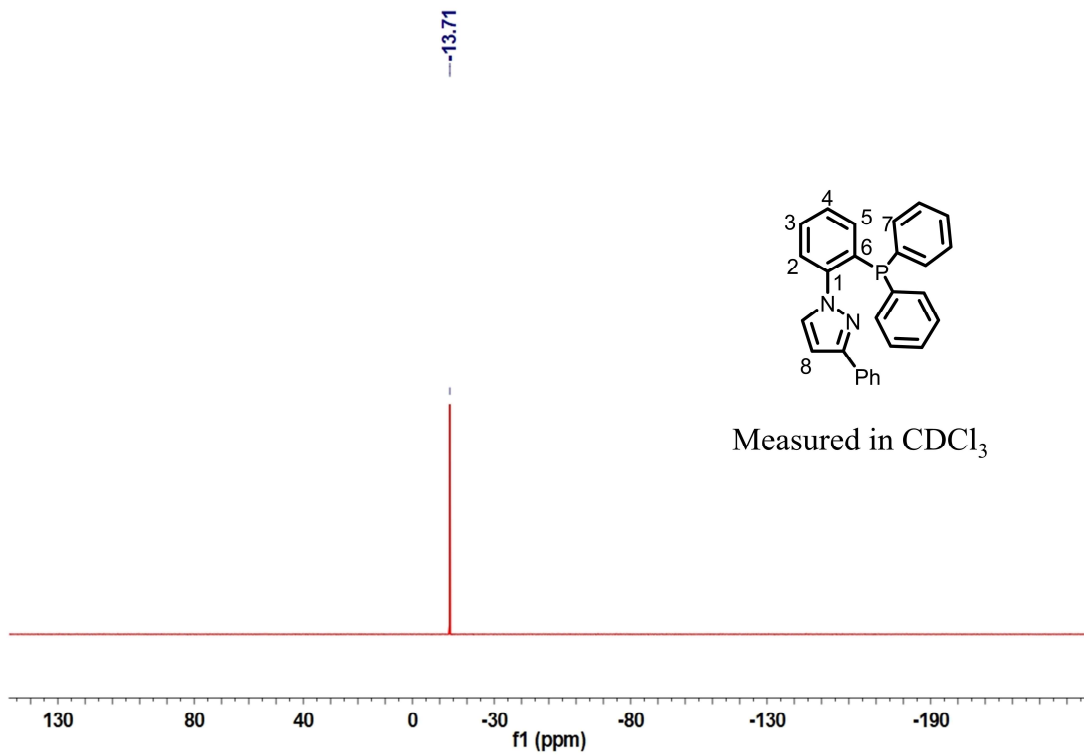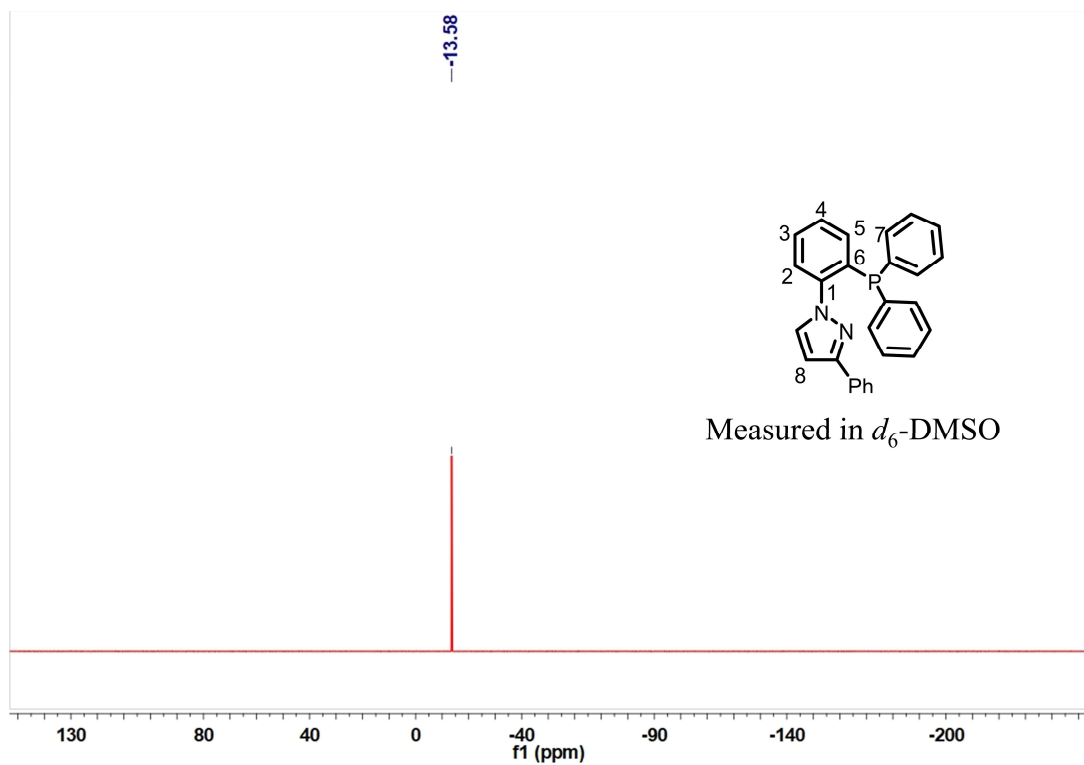

**Fig. S17.** The  $^1\text{H}$  (400 MHz),  $^{13}\text{C}\{^1\text{H}\}$  (101 MHz) and  $^{31}\text{P}$  (162 MHz) NMR spectra for 1-(2-(diphenylphosphanyl)phenyl)-3,5-dimethyl-1H-pyrazole (**1d**) in  $\text{CDCl}_3$  and  $^{31}\text{P}$  (162 MHz) NMR spectra in  $d_6$ -DMSO.

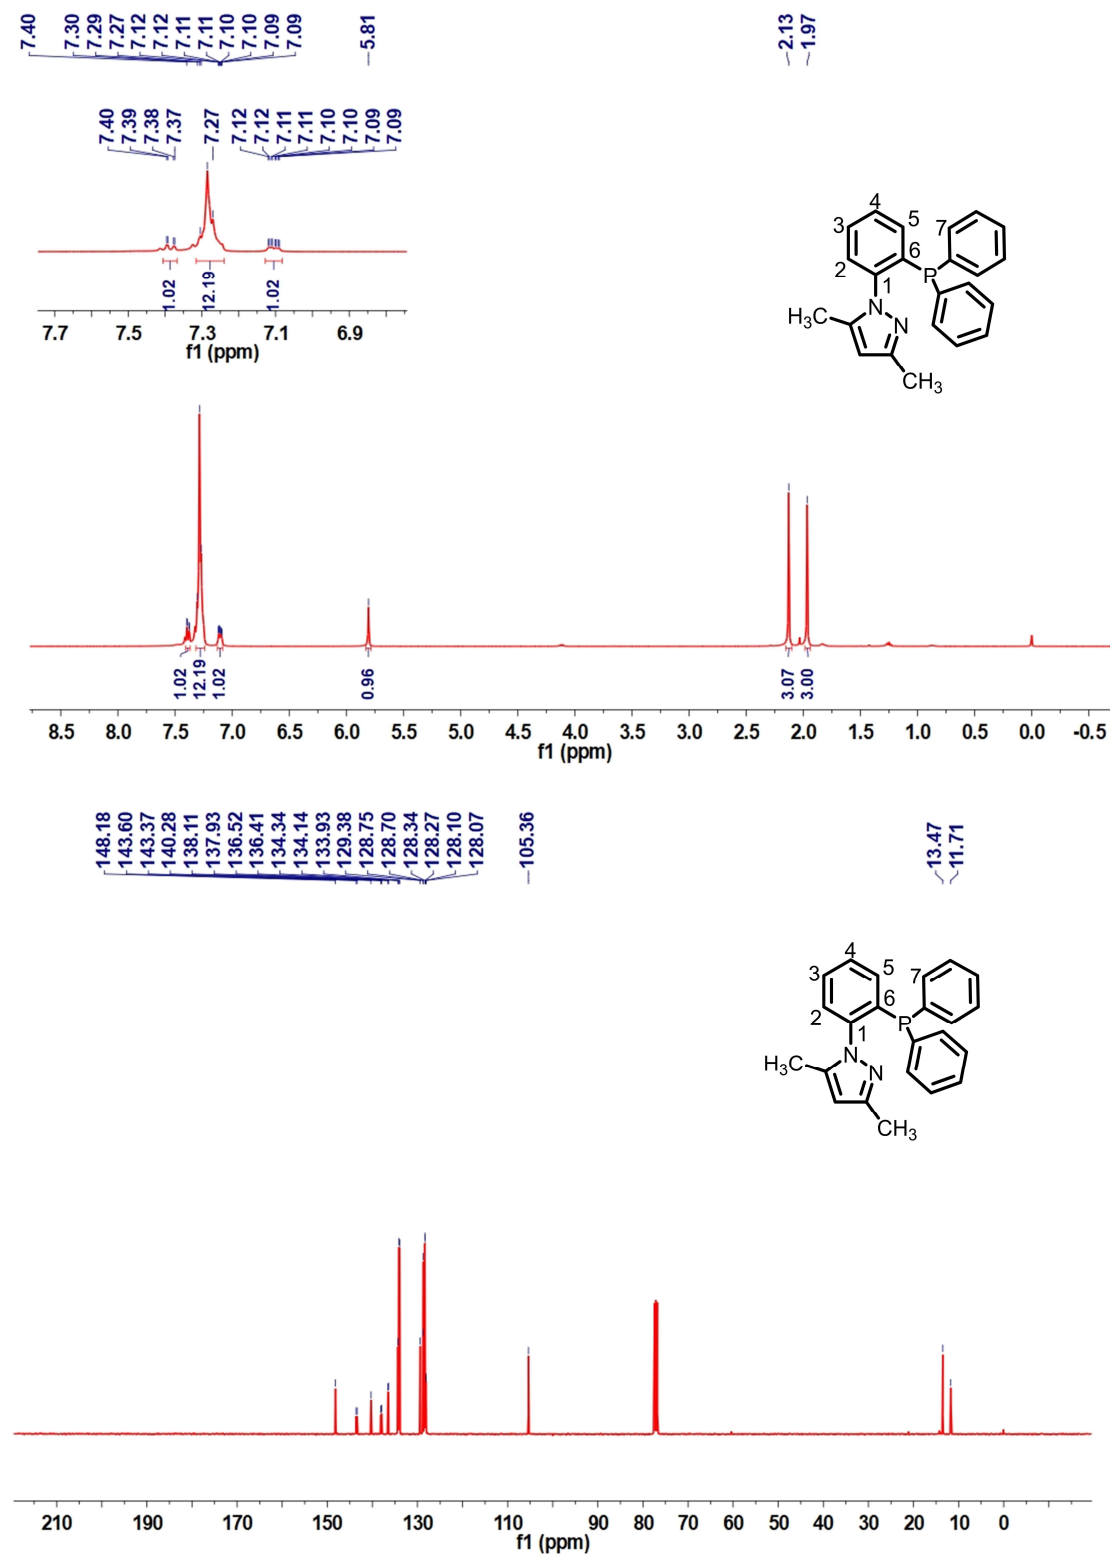

-14.23

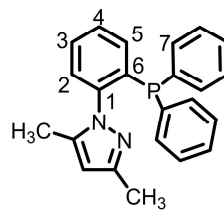

Measured in CDCl<sub>3</sub>

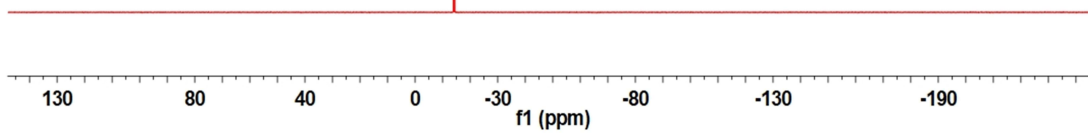

-15.61

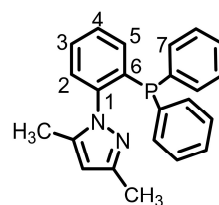

Measured in d<sub>6</sub>-DMSO

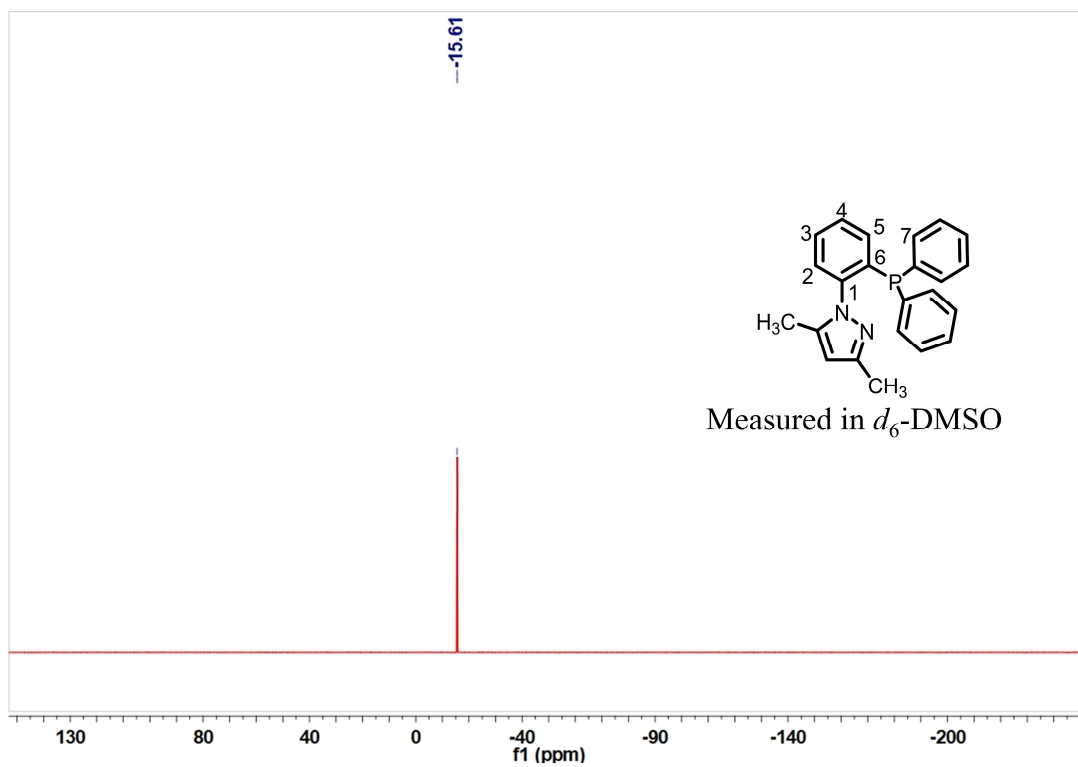

**Fig. S18.** The  $^1\text{H}$  (400 MHz),  $^{13}\text{C}\{^1\text{H}\}$  (101 MHz) and  $^{31}\text{P}$  (162 MHz) NMR spectra for **2a** in  $d_6$ -DMSO.

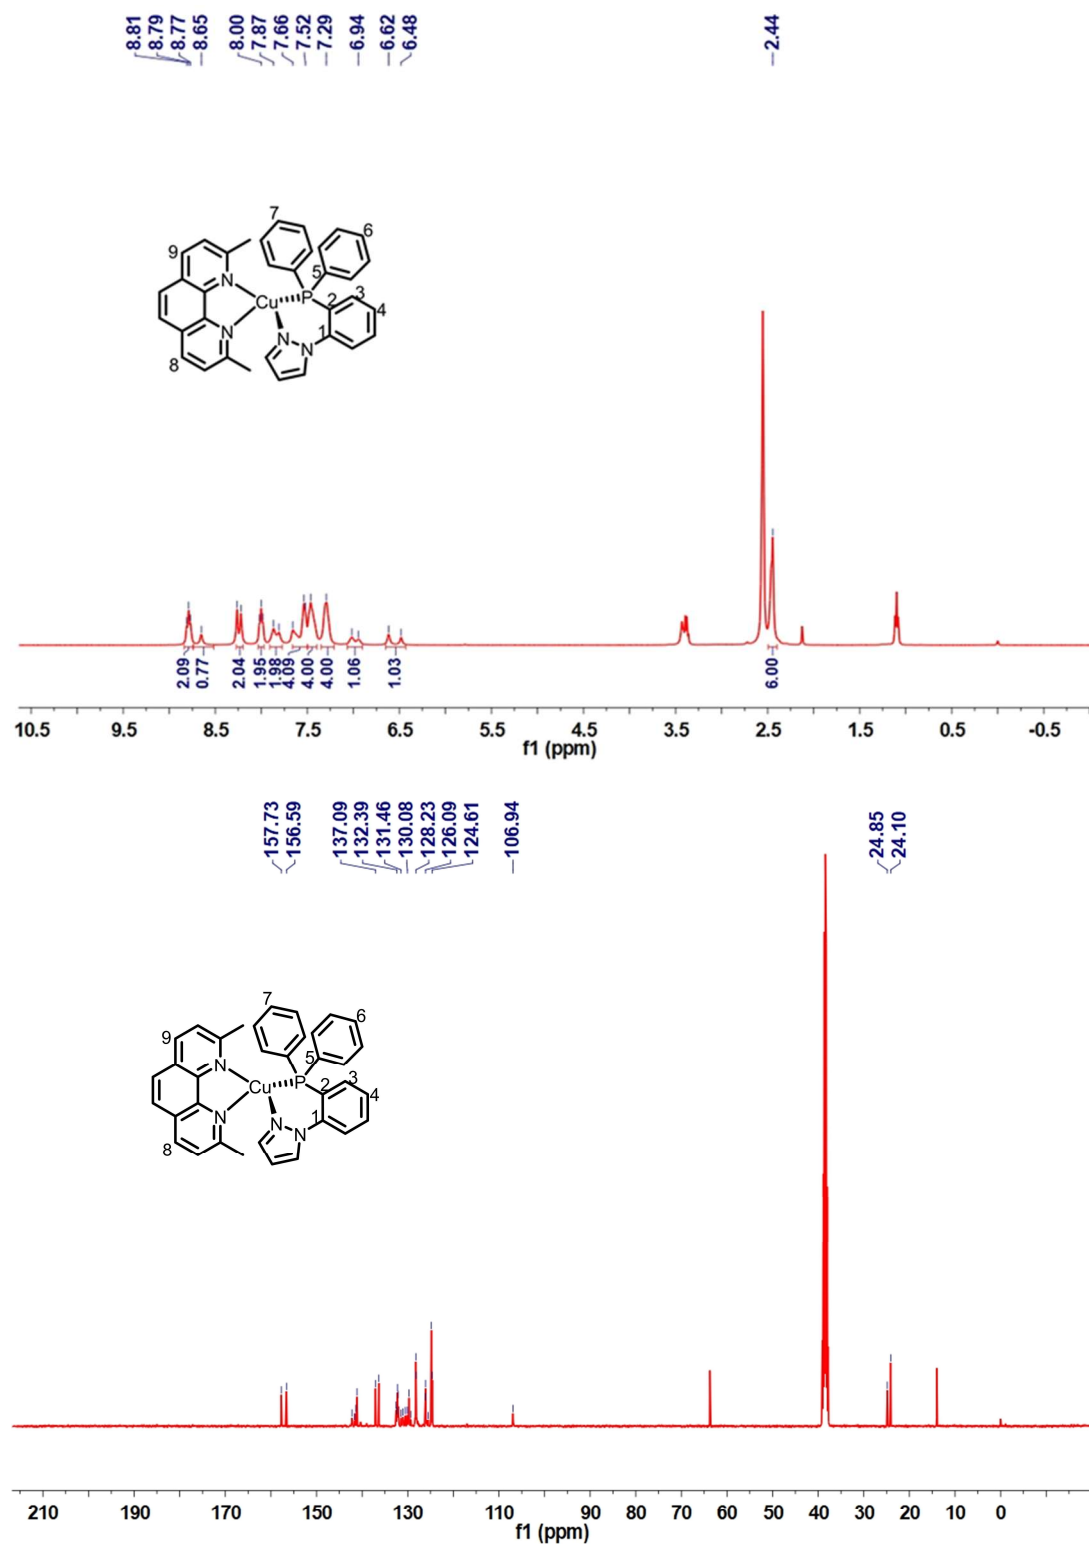

-8.26

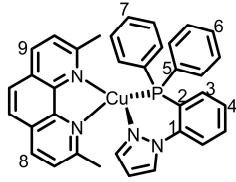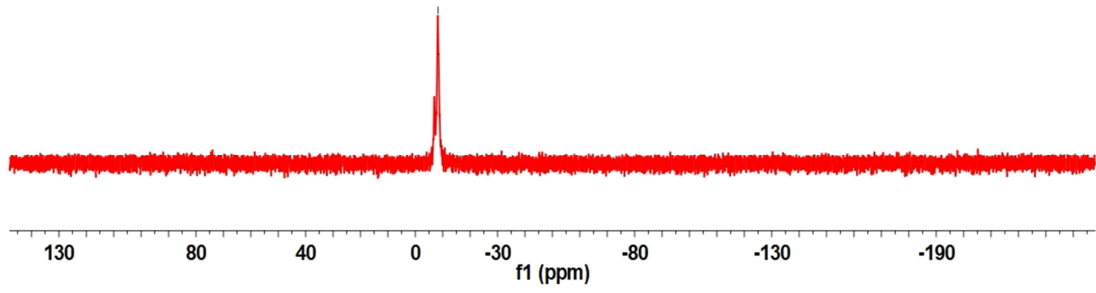

**Fig. S19.** The  $^1\text{H}$  (400 MHz),  $^{13}\text{C}\{^1\text{H}\}$  (101 MHz) and  $^{31}\text{P}$  (162 MHz) NMR spectra for **2b** in  $d_6$ -DMSO.

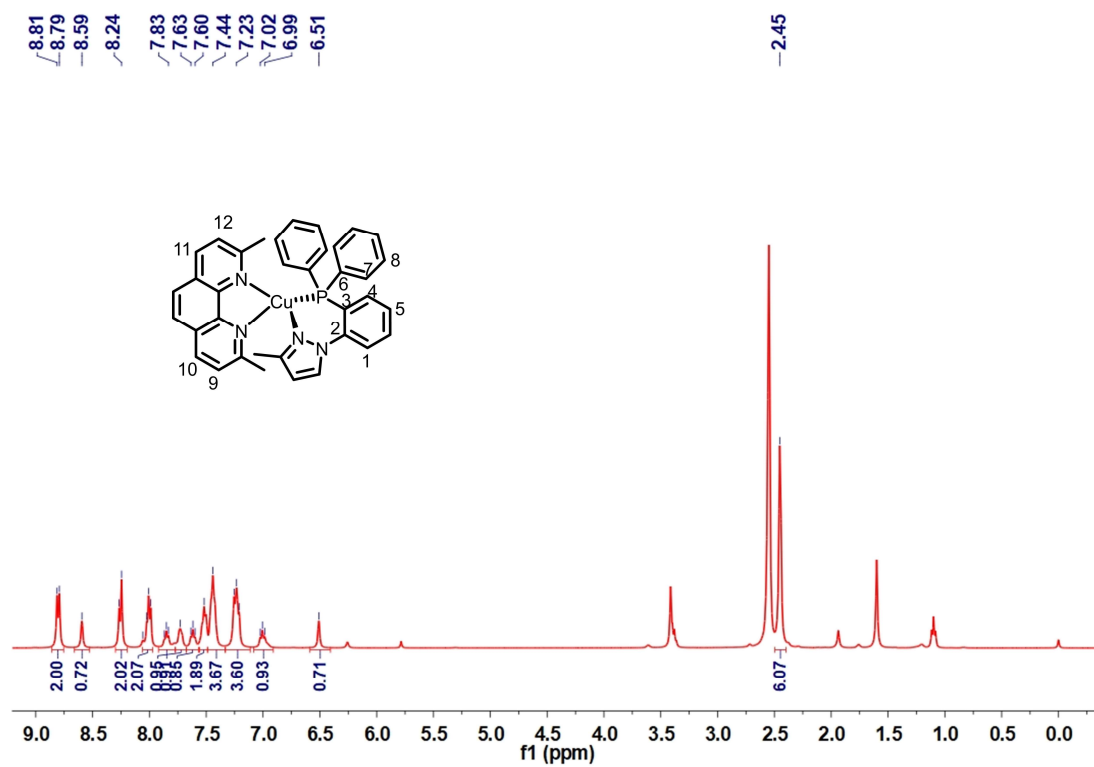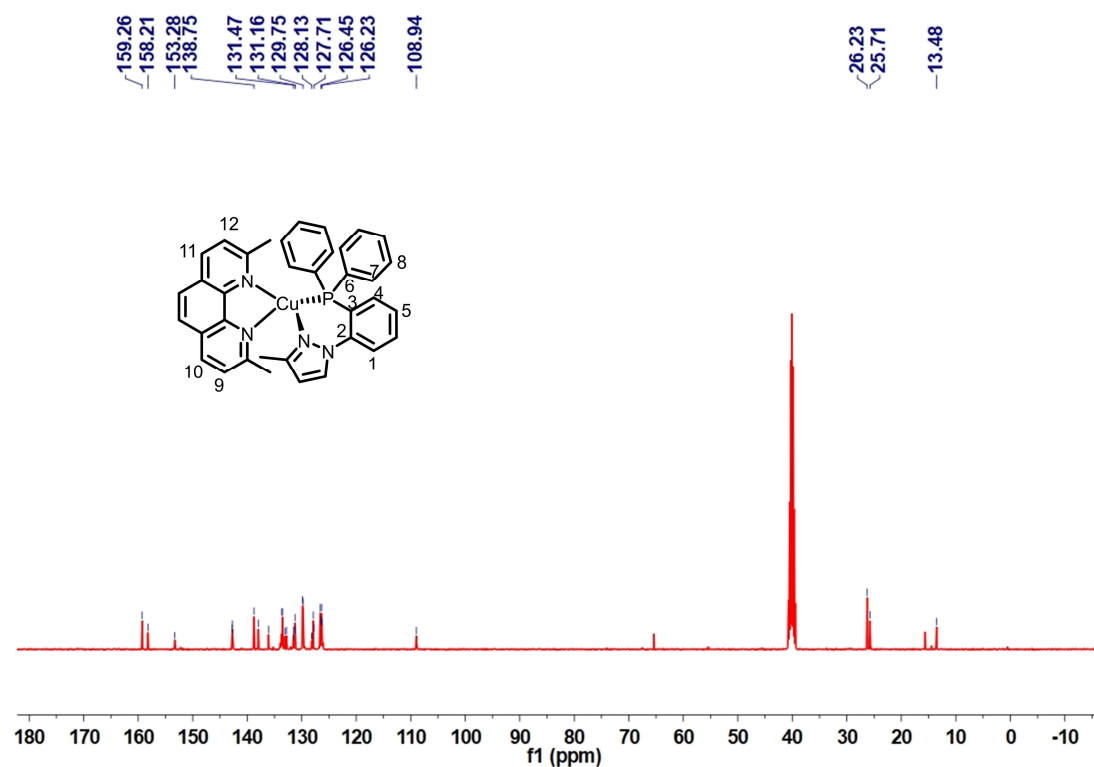

--11.89

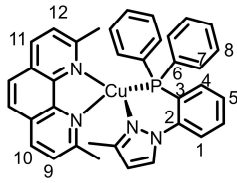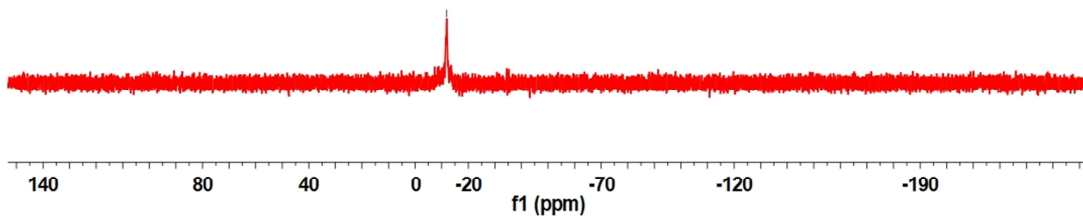



**Fig. S20.** The  $^1\text{H}$  (400 MHz),  $^{13}\text{C}\{^1\text{H}\}$  (101 MHz) and  $^{31}\text{P}$  (162 MHz) NMR spectra for **2c** in  $d_6$ -DMSO and  $^{31}\text{P}$  (162 MHz) NMR spectra in  $\text{CDCl}_3$ .

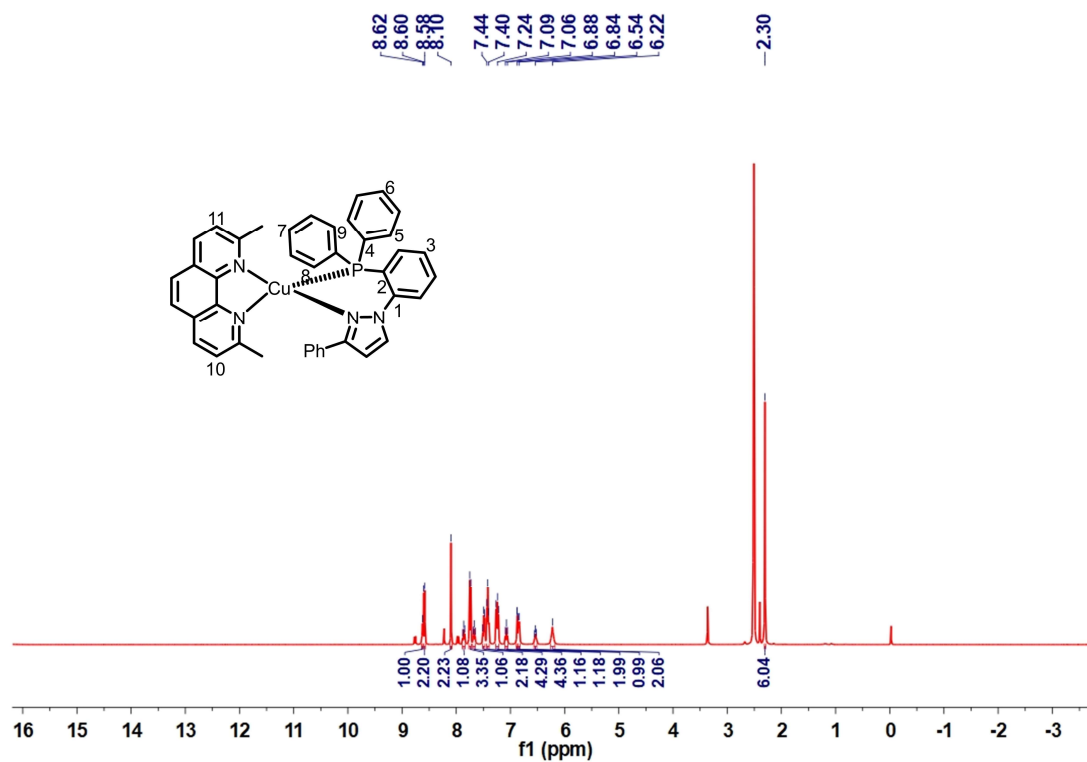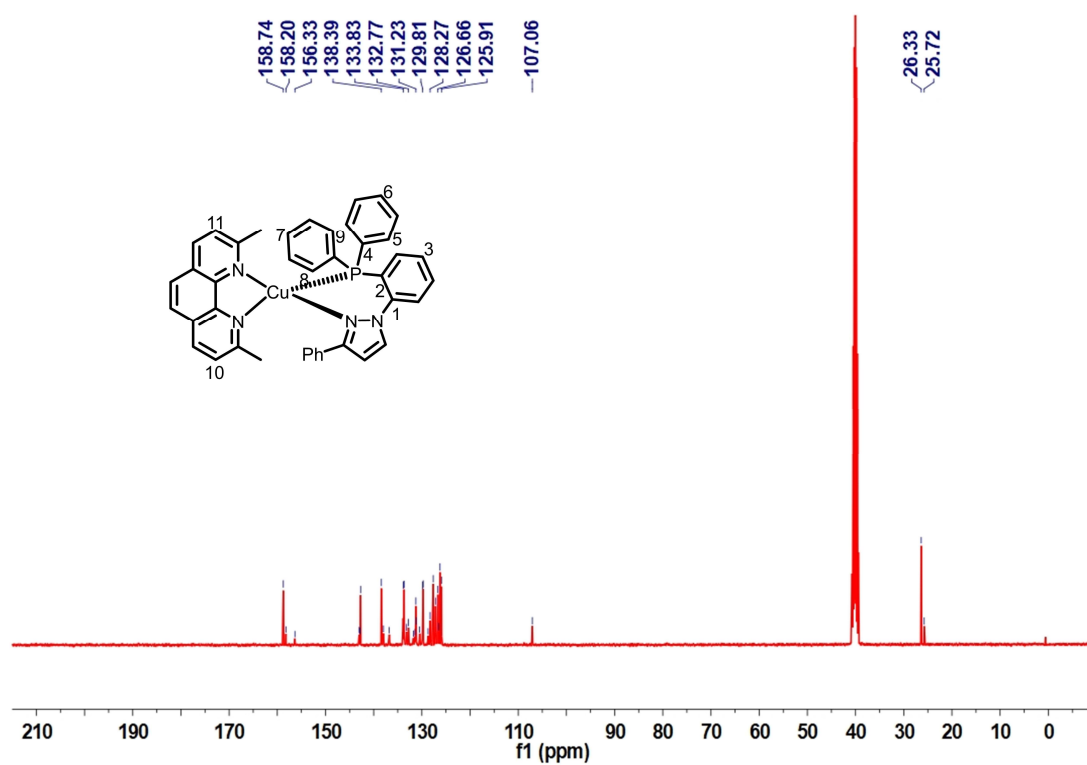

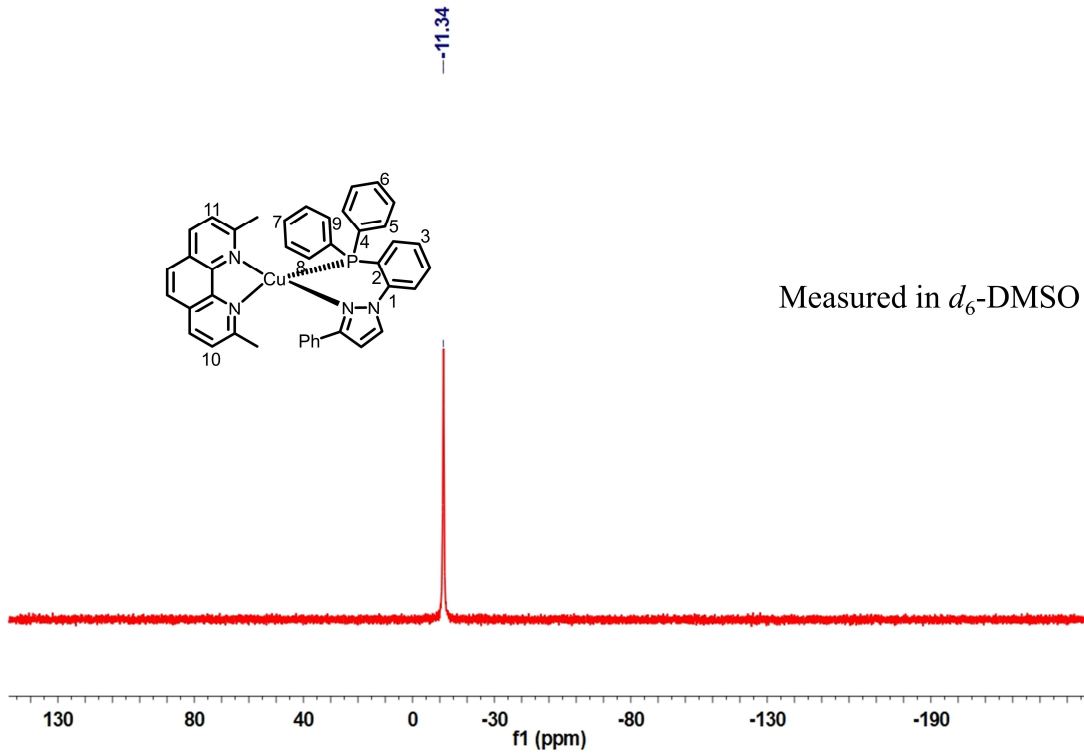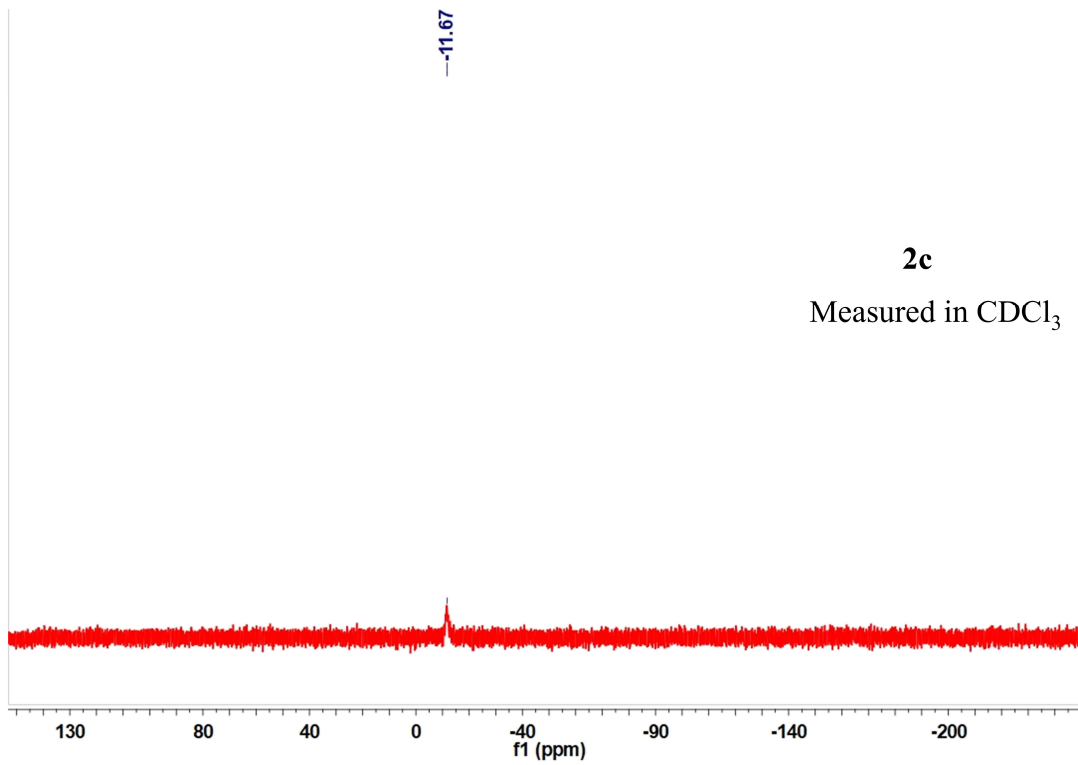

**Fig. S21.** The  $^1\text{H}$  (400 MHz),  $^{13}\text{C}\{^1\text{H}\}$  (101 MHz) and  $^{31}\text{P}$  (162 MHz) NMR spectra for **2d** in  $d_6$ -DMSO.

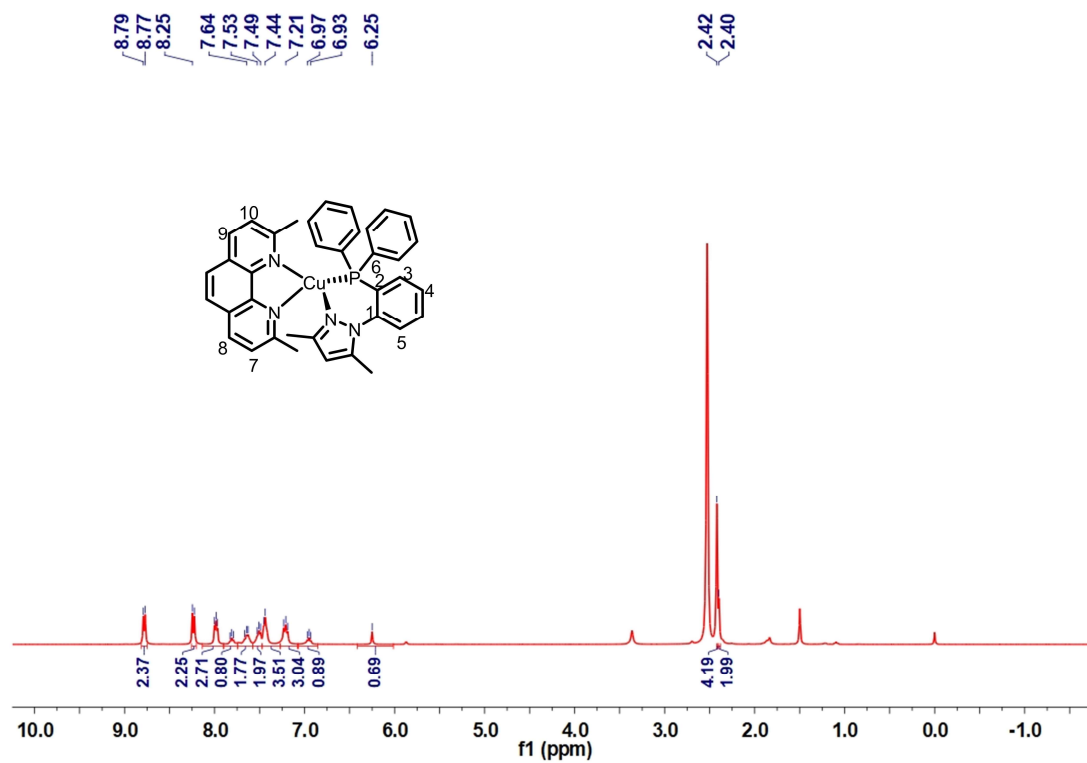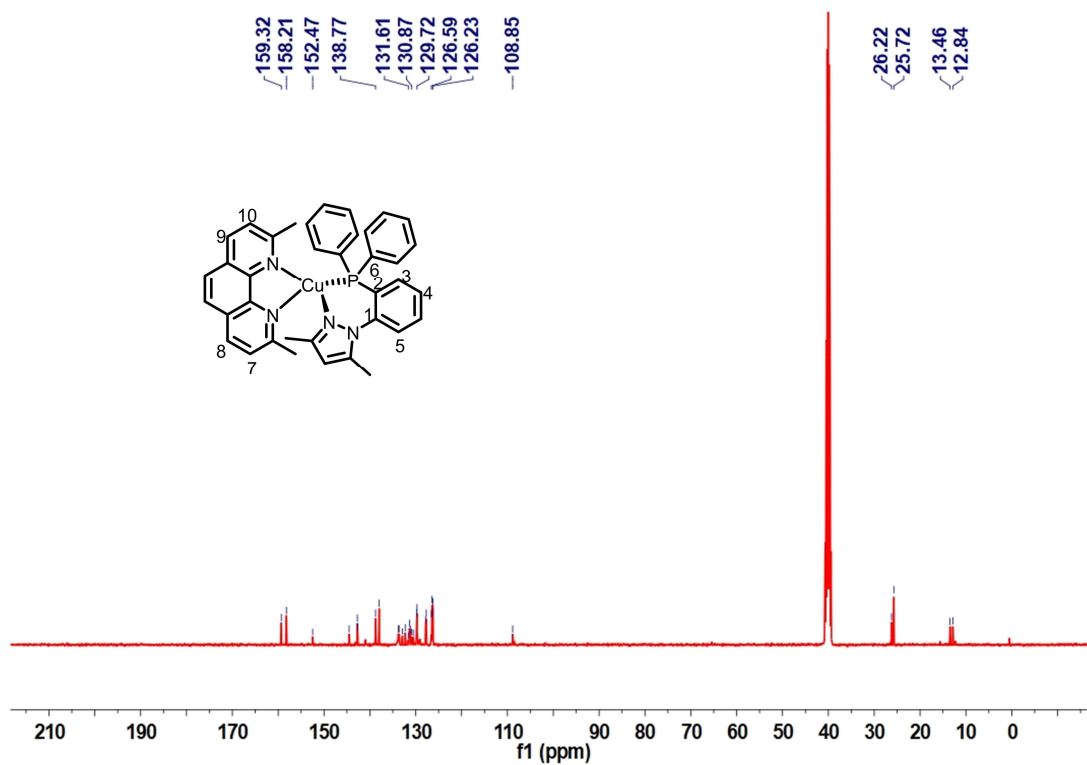

--12.17

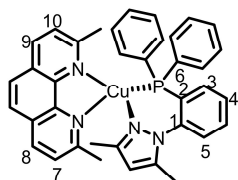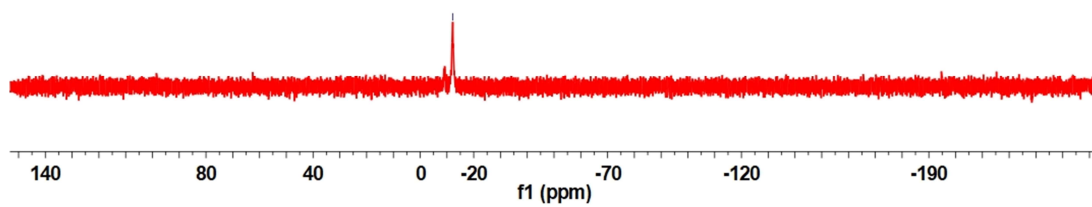

**Fig. S22.** The  $^1\text{H}$  (400 MHz) and  $^{31}\text{P}$  (162 MHz) NMR spectra for  $[\text{Cu}(\mathbf{1c})]\text{BF}_4$  in  $\text{CDCl}_3$ .

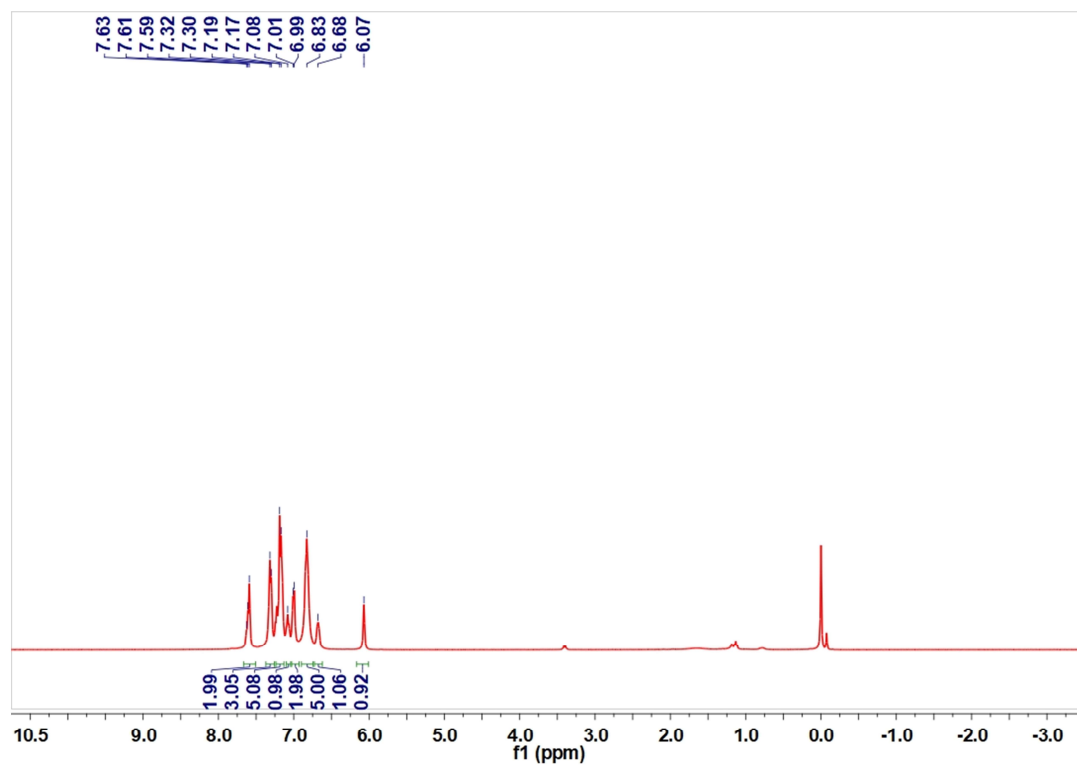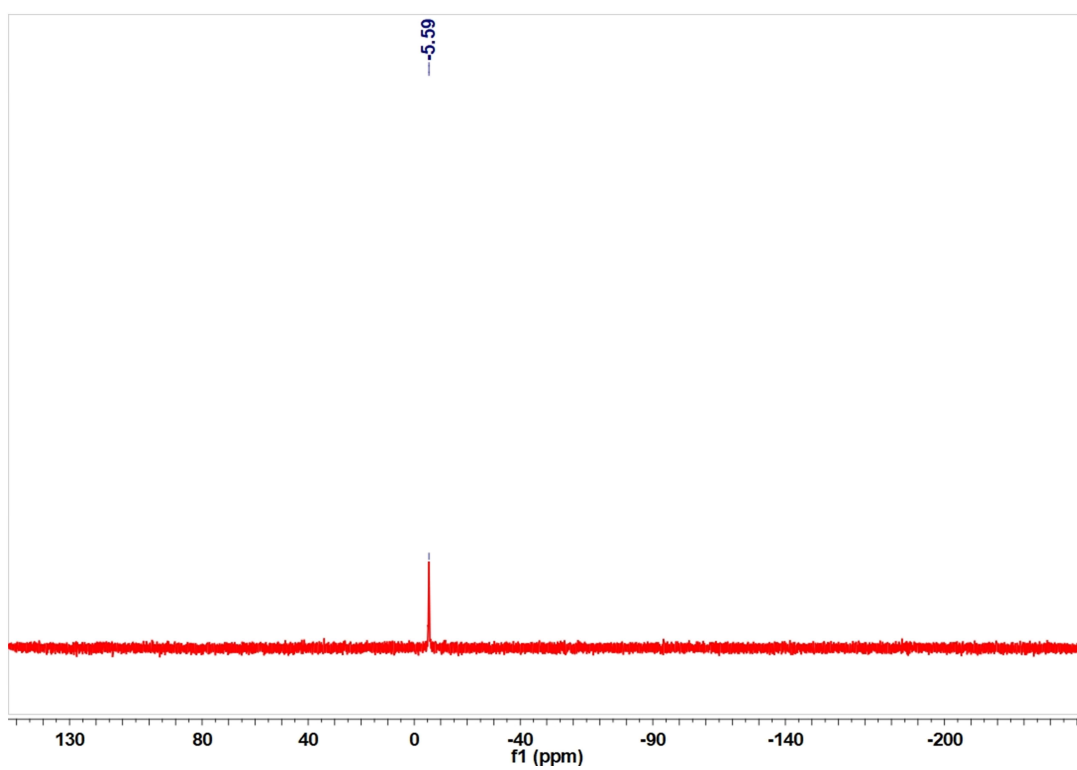

**Fig. S23.** The  $^1\text{H}$  (400 MHz) and  $^{13}\text{C}\{^1\text{H}\}$  (101 MHz) NMR spectra for (1,3,3,3-tetrabromopropyl)benzene (**5a**) in  $\text{CDCl}_3$ .

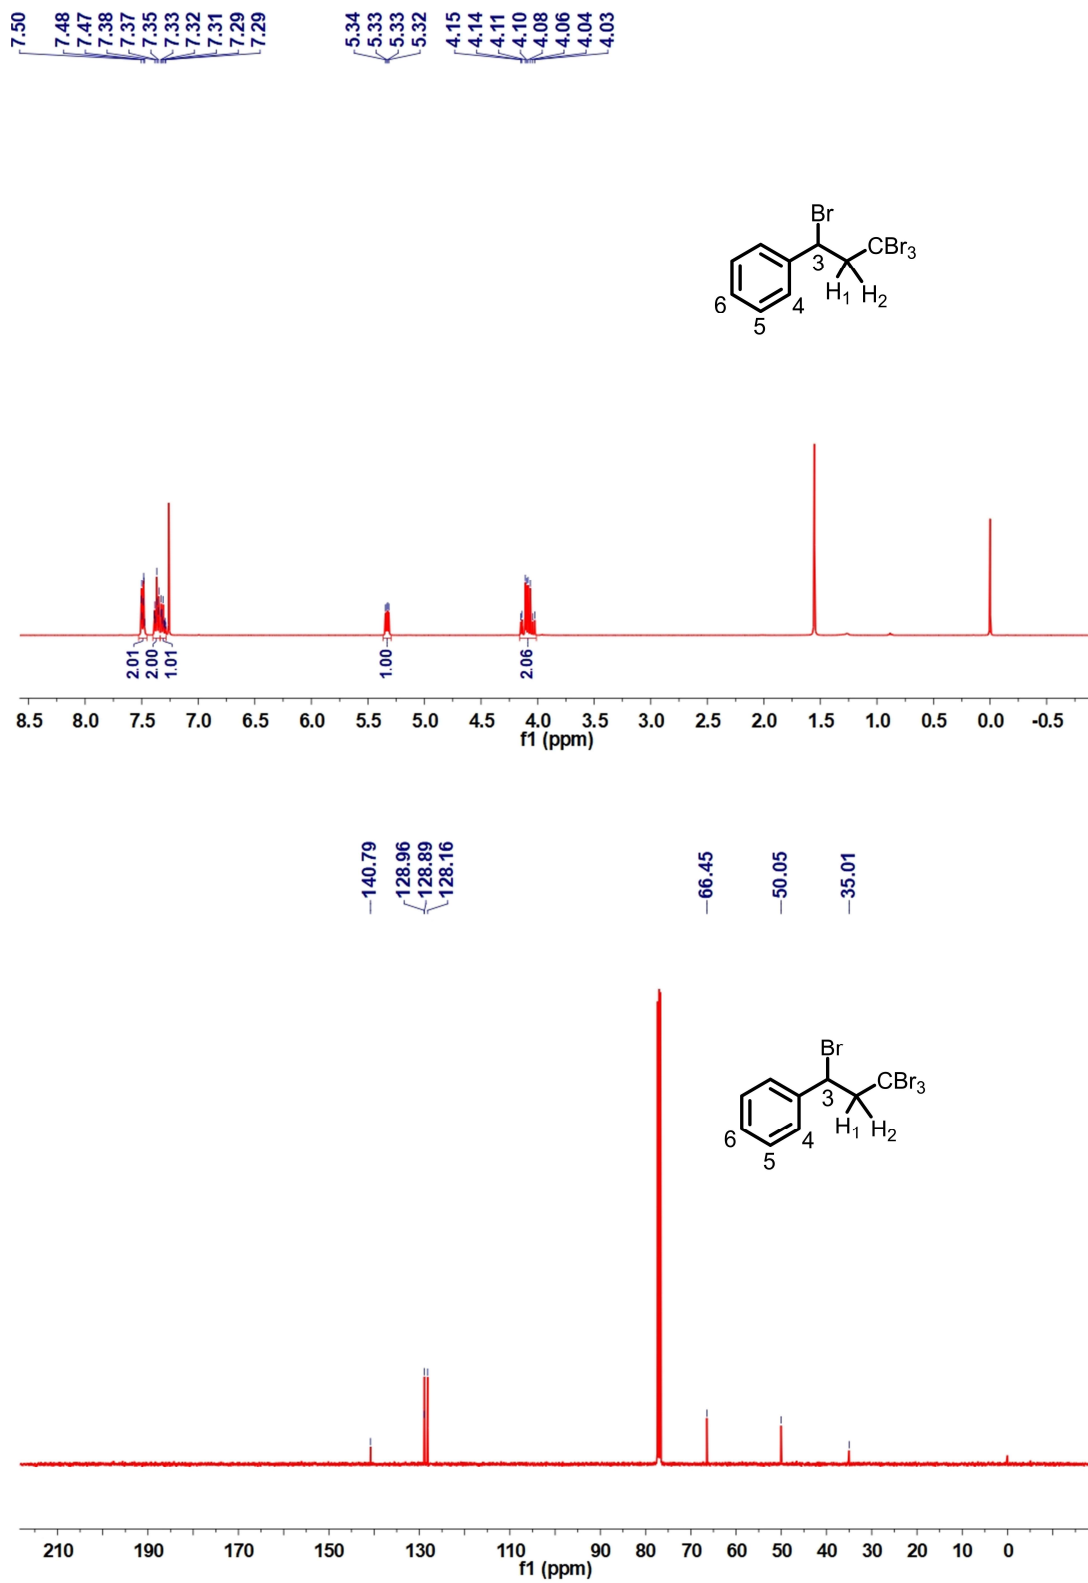

**Fig. S24.** The  $^1\text{H}$  (400 MHz),  $^{13}\text{C}\{^1\text{H}\}$  (101 MHz) and  $^{19}\text{F}$  (377 MHz) NMR spectra for 1-fluoro-4-(1,3,3,3-tetrabromopropyl)benzene (**5b**) in  $\text{CDCl}_3$ .

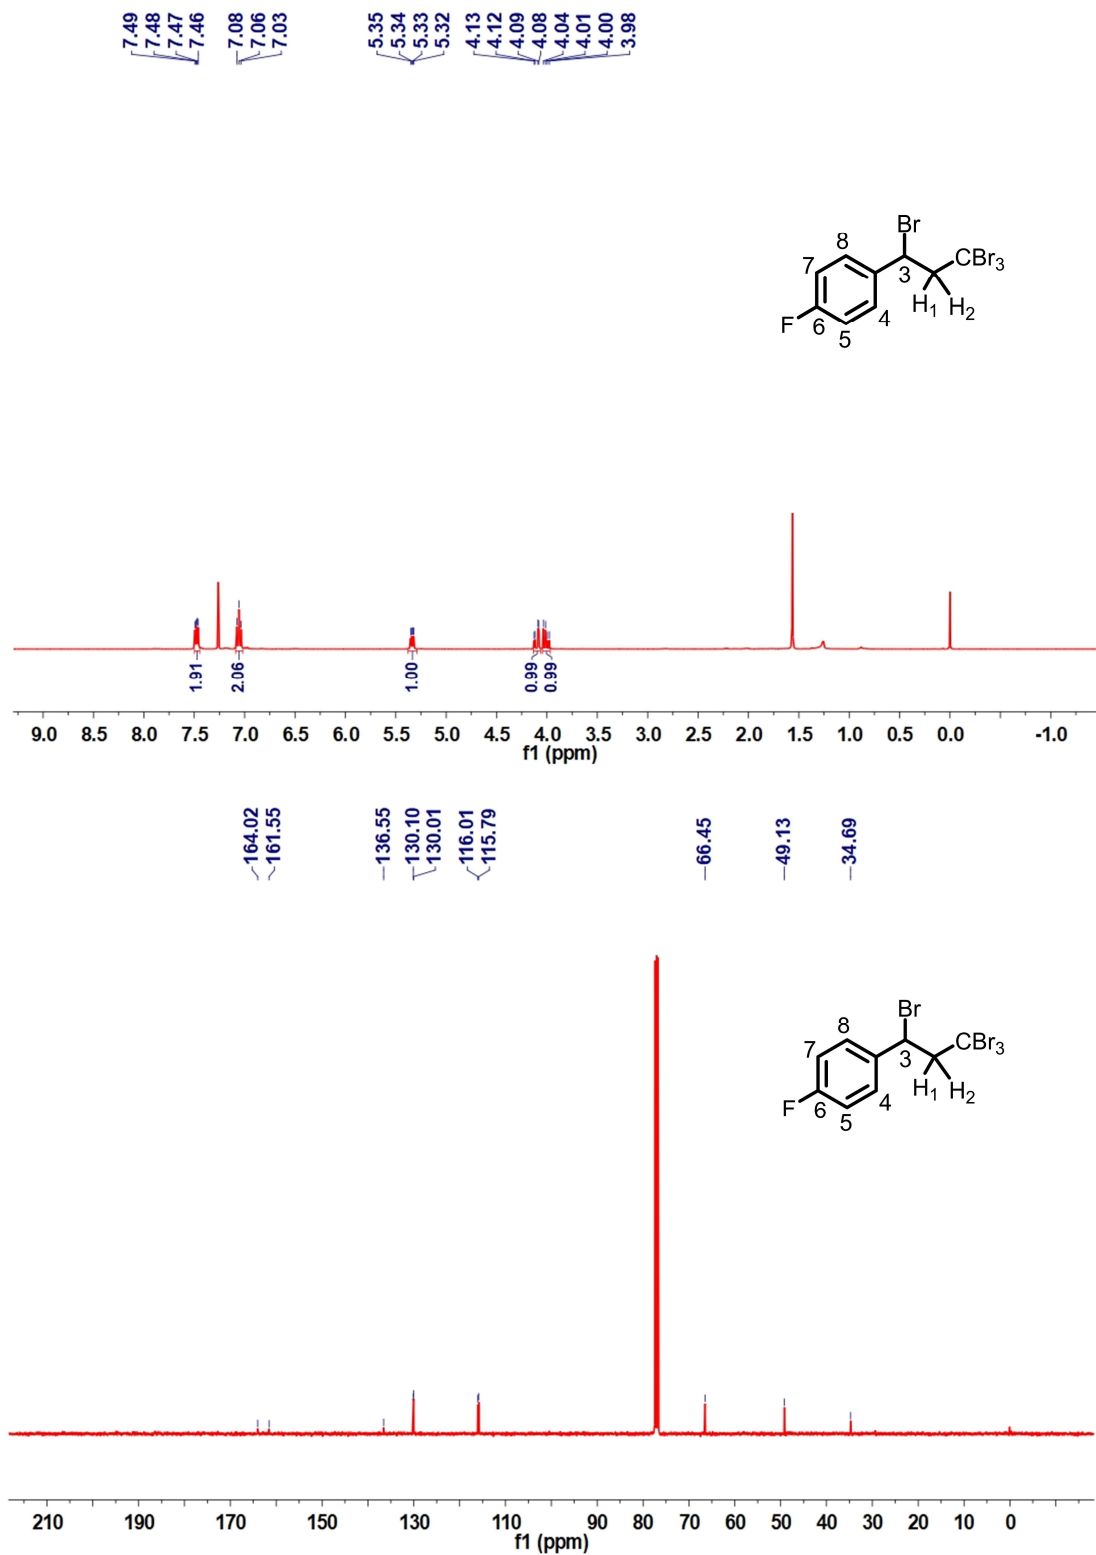

--111.95

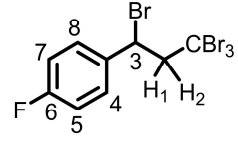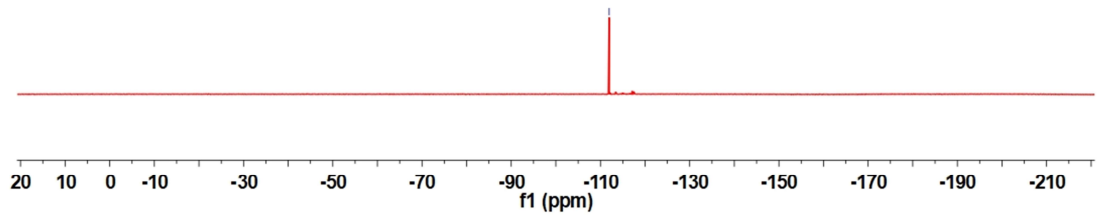



**Fig. S25.** The  $^1\text{H}$  (400 MHz) and  $^{13}\text{C}\{^1\text{H}\}$  (101 MHz) NMR spectra for 1-chloro-4-(1,3,3,3-tetrabromopropyl)benzene (**5c**) in  $\text{CDCl}_3$ .

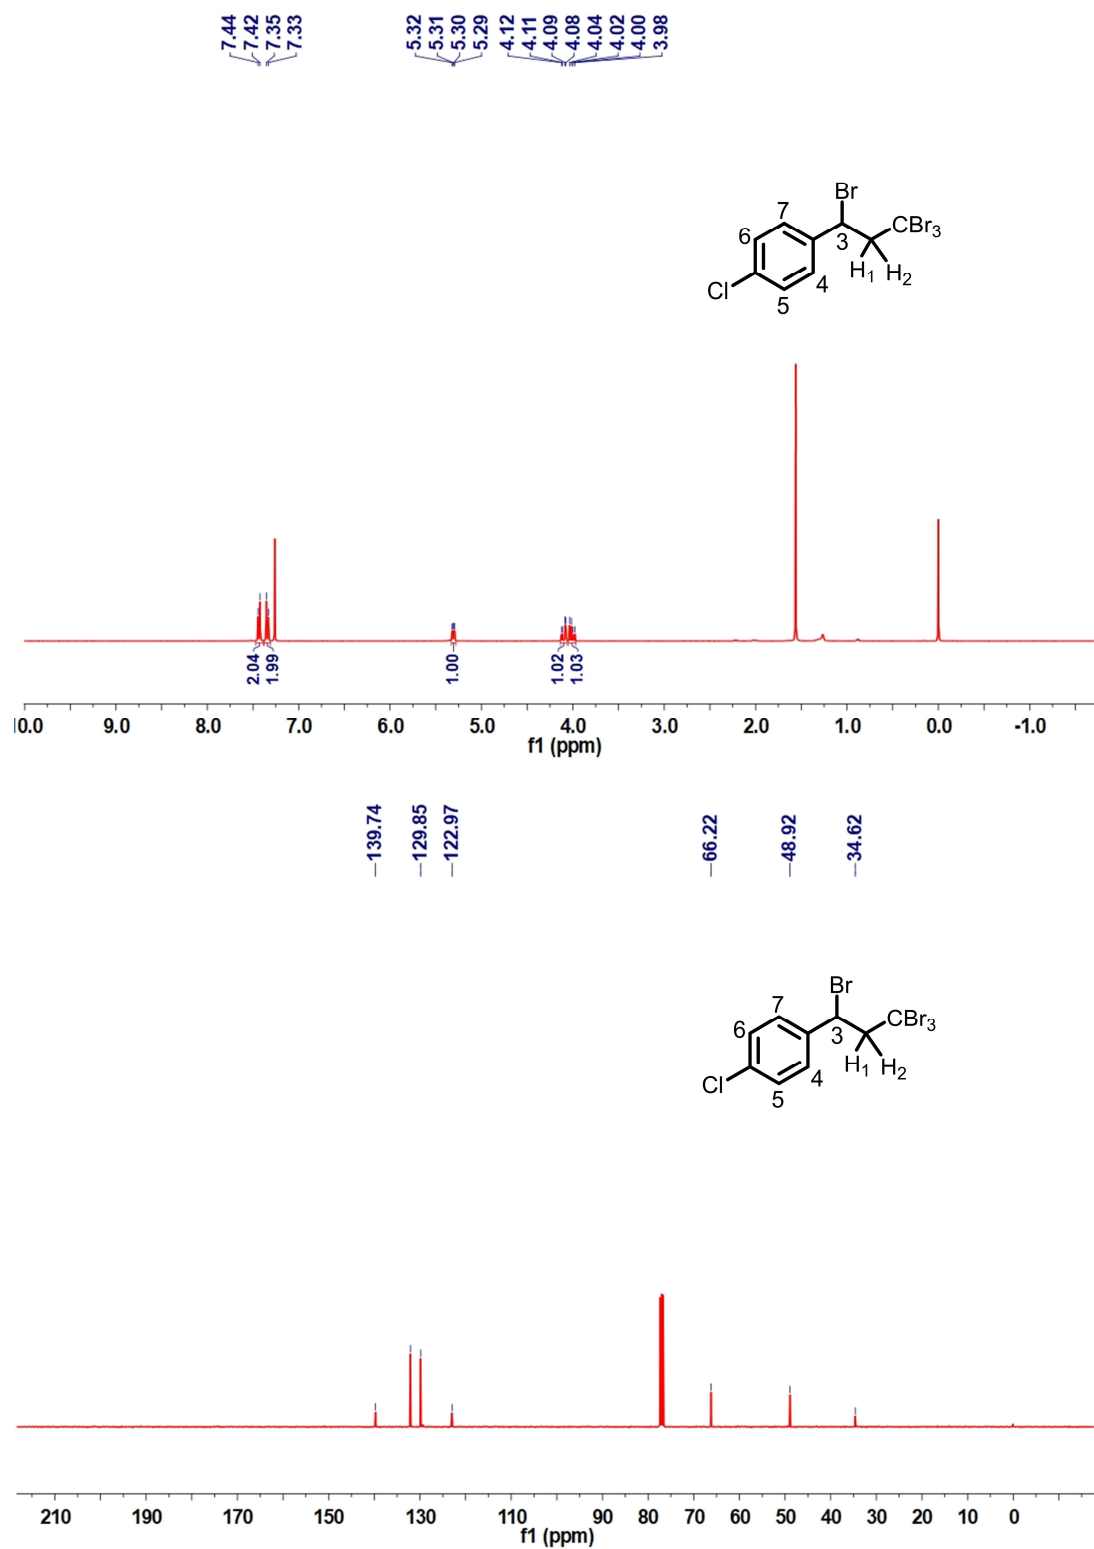

**Fig. S26.** The  $^1\text{H}$  (400 MHz) and  $^{13}\text{C}\{^1\text{H}\}$  (101 MHz) NMR spectra for 1-bromo-4-(1,3,3,3-tetrabromopropyl)benzene (**5d**) in  $\text{CDCl}_3$ .

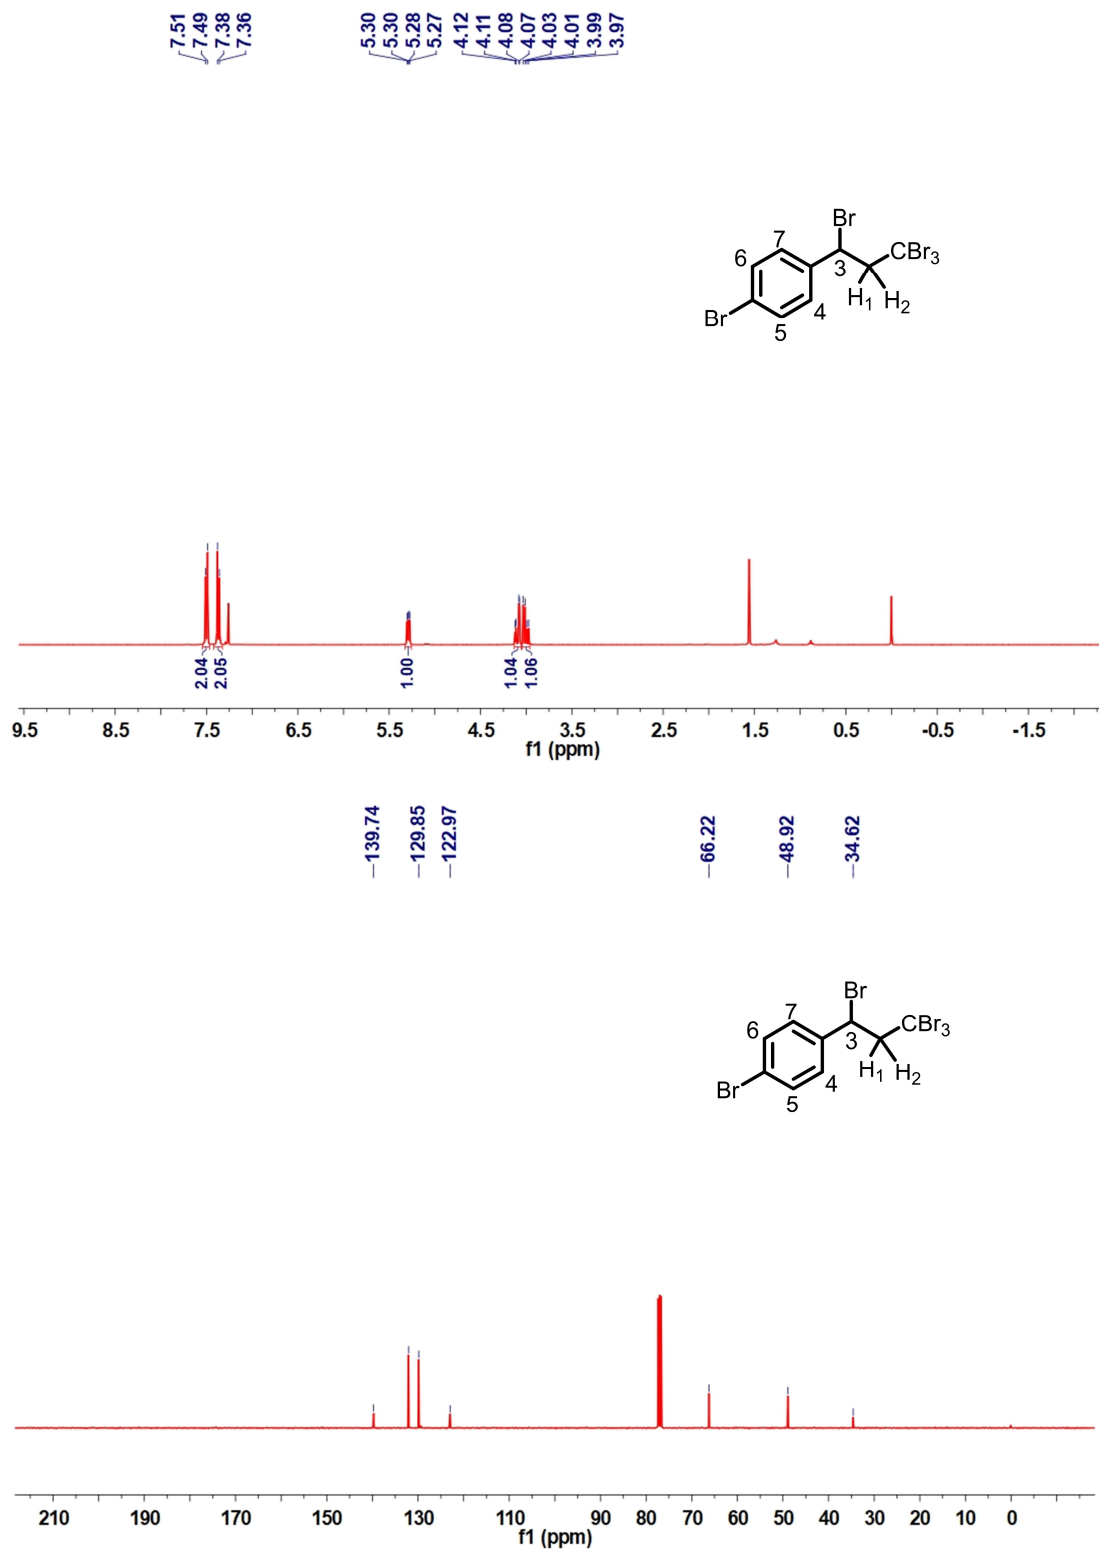

**Fig. S27.** The  $^1\text{H}$  (400 MHz),  $^{13}\text{C}\{^1\text{H}\}$  (101 MHz) and  $^{19}\text{F}$  (377 MHz) NMR spectra for 1-(1,3,3,3-tetrabromopropyl)-4-(trifluoromethyl)benzene (**5e**) in  $\text{CDCl}_3$ .

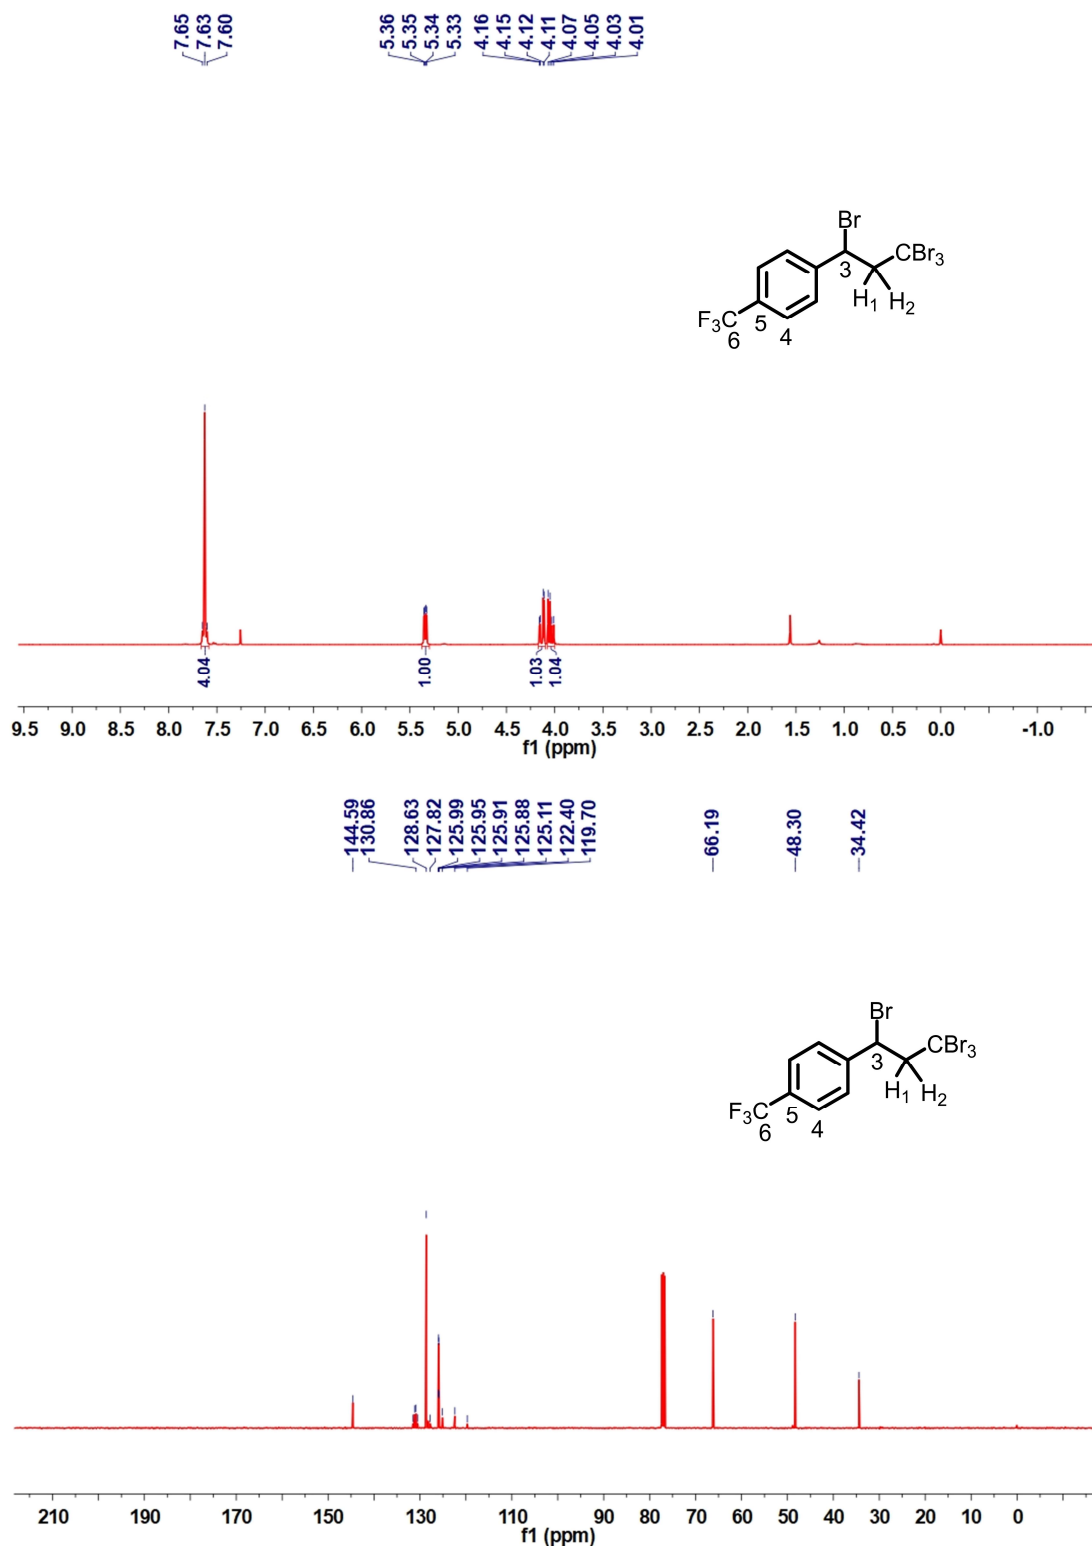

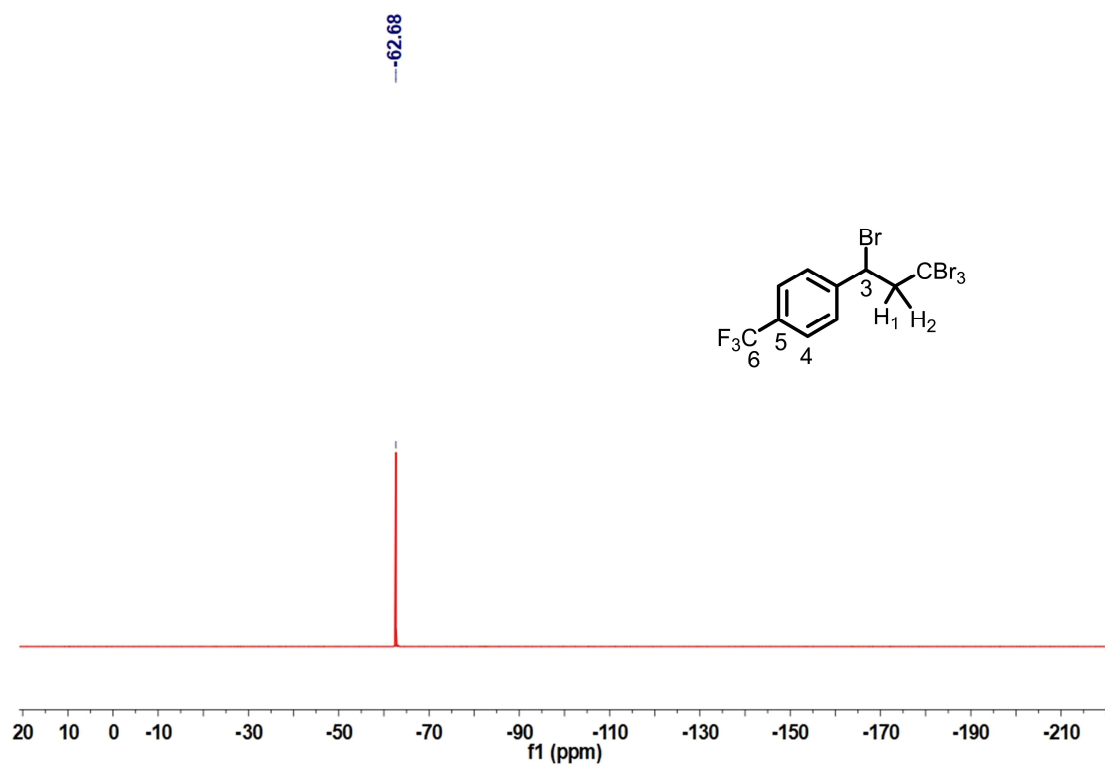

**Fig. S28.** The  $^1\text{H}$  (400 MHz) and  $^{13}\text{C}\{^1\text{H}\}$  (101 MHz) NMR spectra for 4-(1,3,3,3-tetrabromopropyl)phenyl acetate (**5f**) in  $\text{CDCl}_3$ .

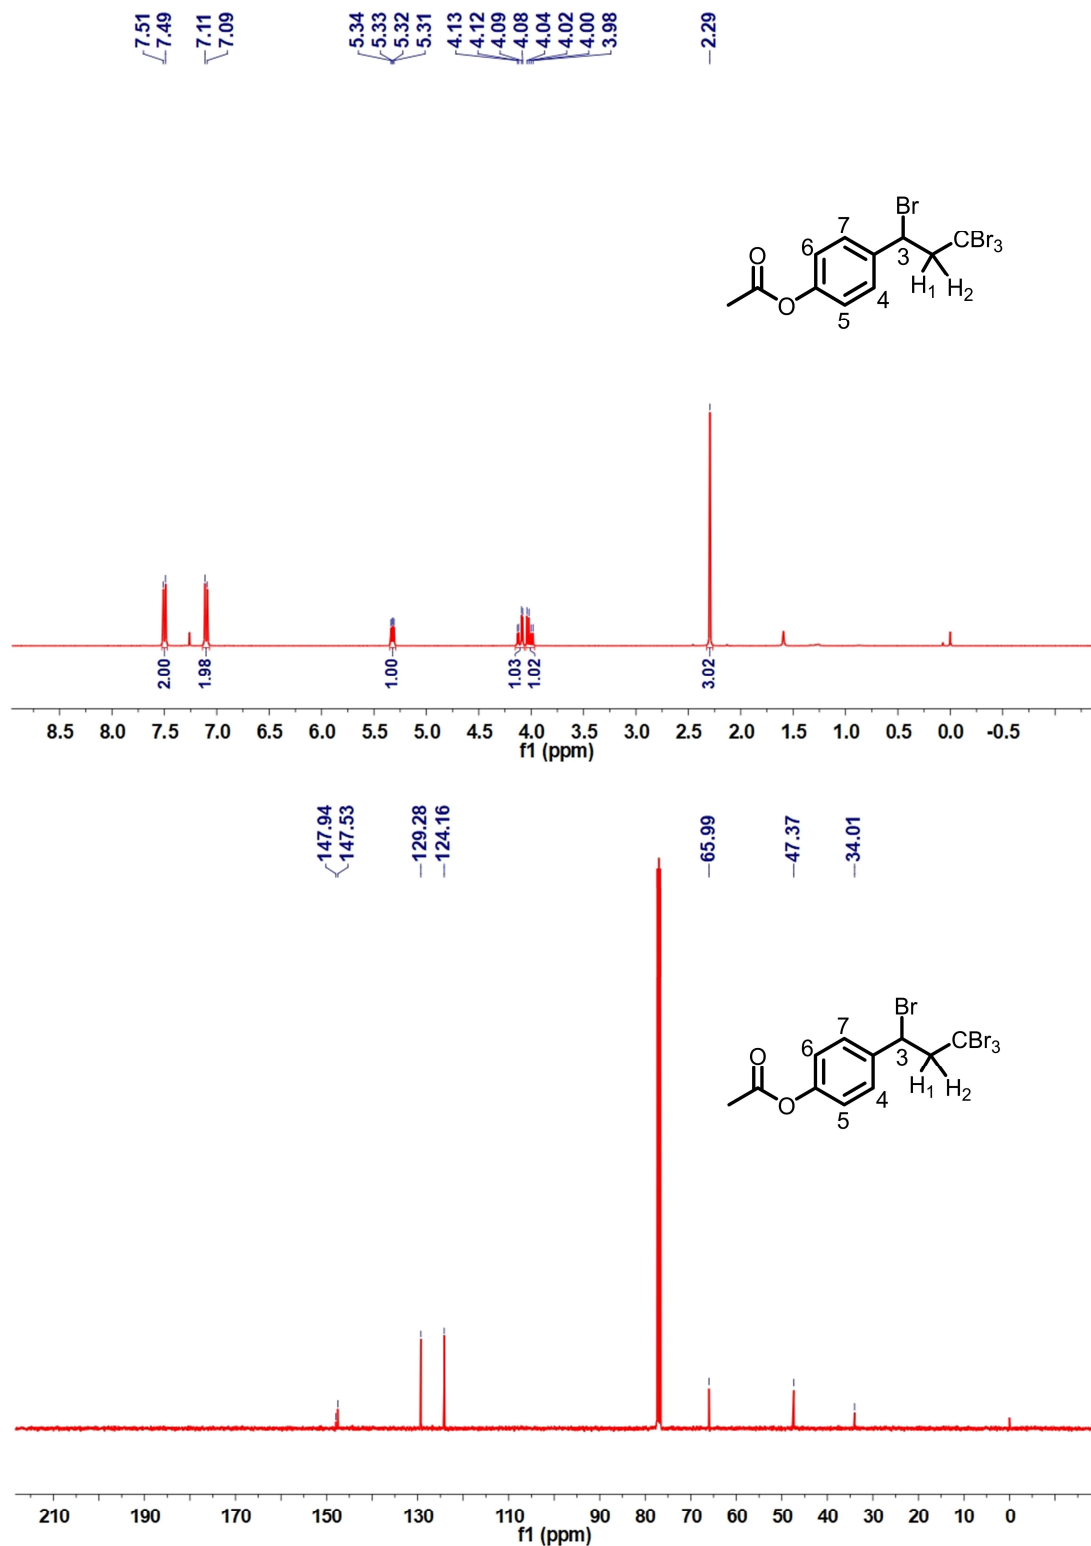

**Fig. S29.** The  $^1\text{H}$  (400 MHz) and  $^{13}\text{C}\{^1\text{H}\}$  (101 MHz) NMR spectra for 1-nitro-4-(1,3,3,3-tetrabromopropyl)benzene (**5g**) in  $\text{CDCl}_3$ .

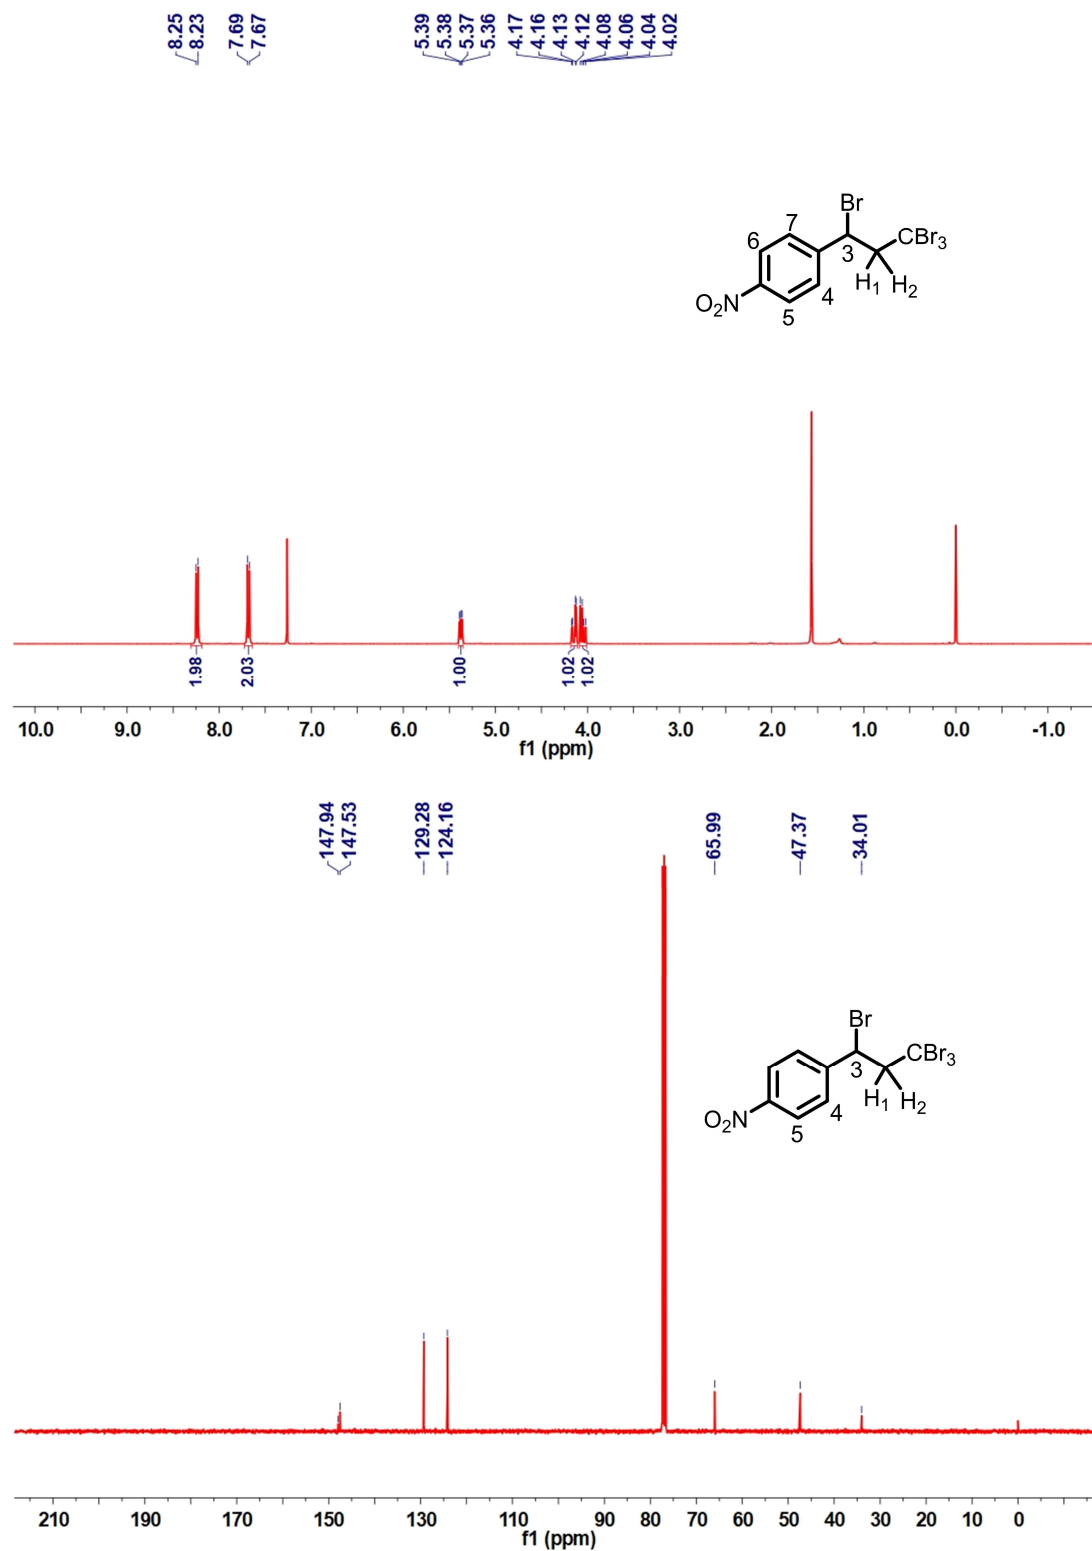

**Fig. S30.** The  $^1\text{H}$  (400 MHz),  $^{13}\text{C}\{^1\text{H}\}$  (101 MHz) and  $^{19}\text{F}$  (377 MHz) NMR spectra for 1-fluoro-3-(1,3,3,3-tetrabromopropyl)benzene (**5h**) in  $\text{CDCl}_3$ .

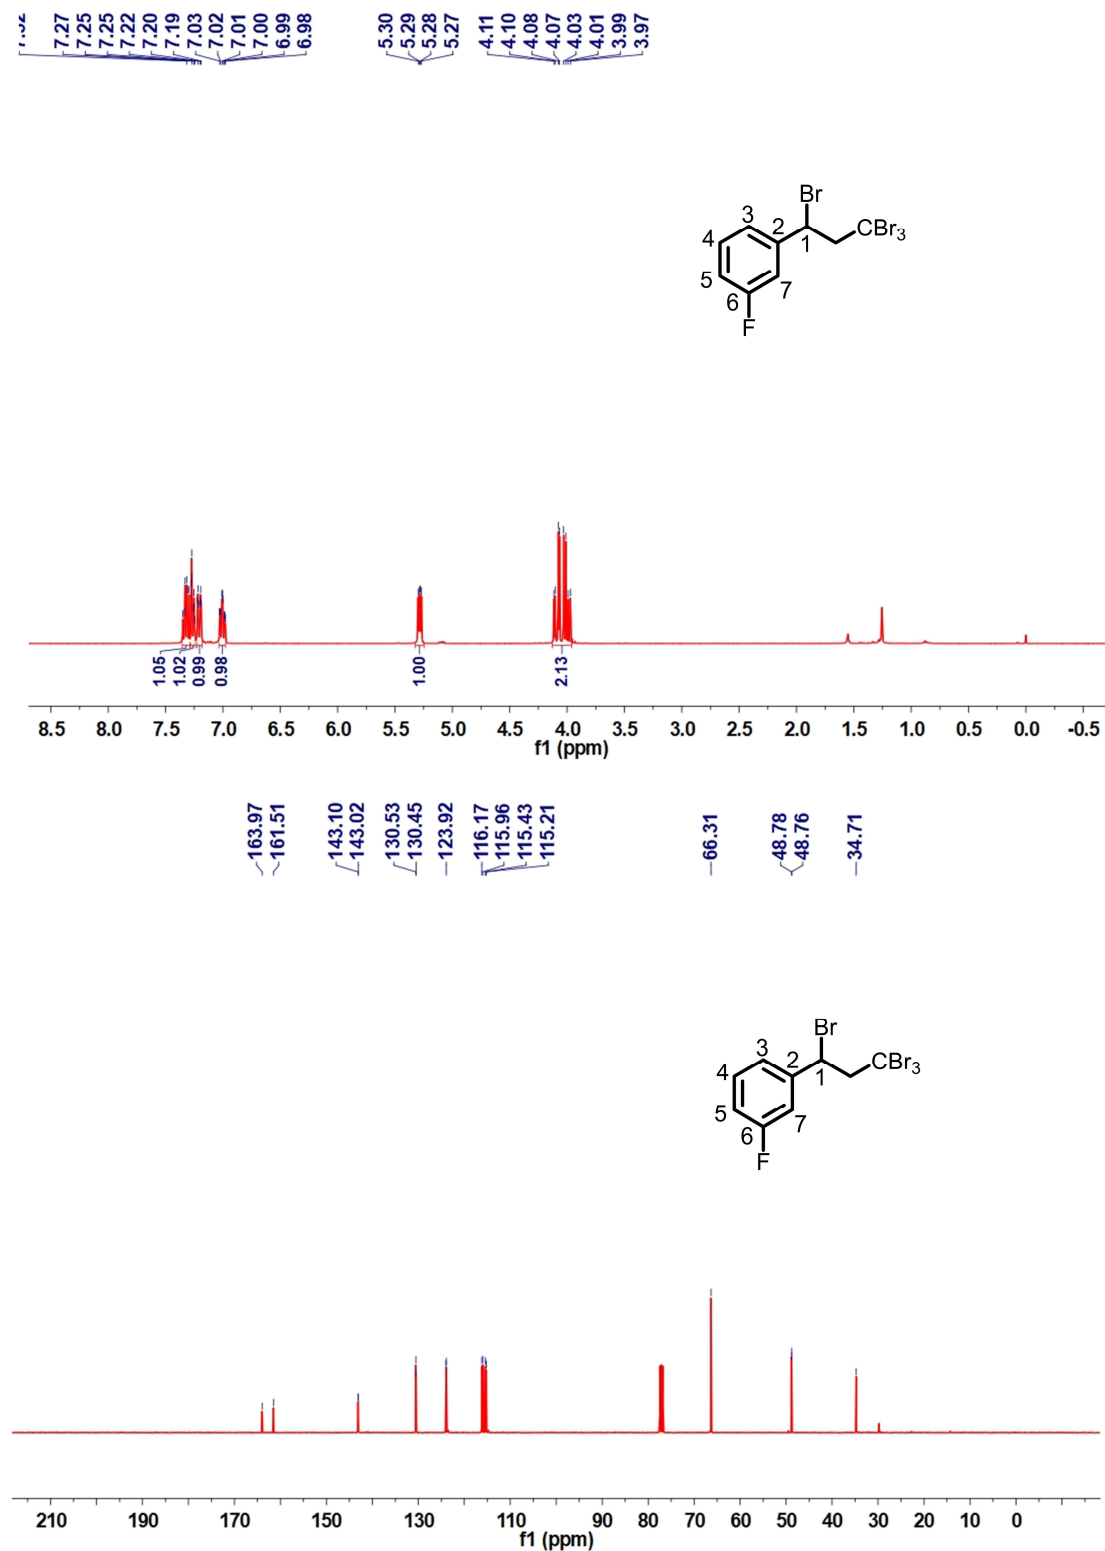

-111.58

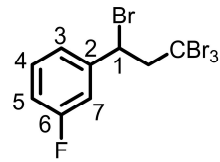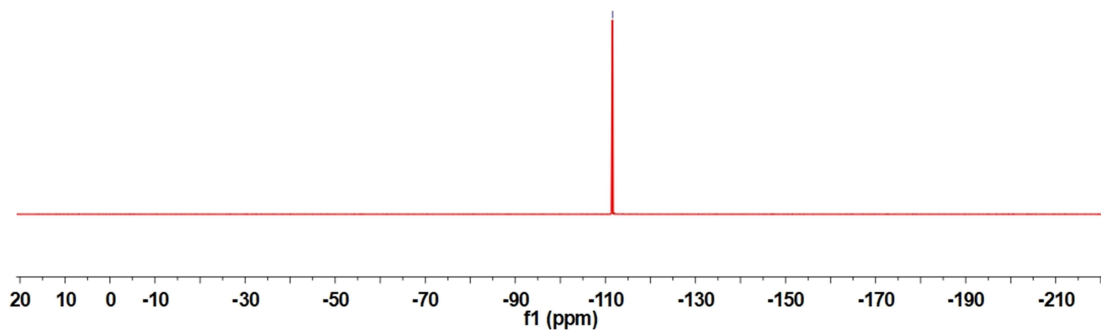



**Fig. S31.** The  $^1\text{H}$  (400 MHz),  $^{13}\text{C}\{^1\text{H}\}$  (101 MHz) and  $^{19}\text{F}$  (377 MHz) NMR spectra for 1-fluoro-2-(1,3,3,3-tetrabromopropyl)benzene (**5i**) in  $\text{CDCl}_3$ .

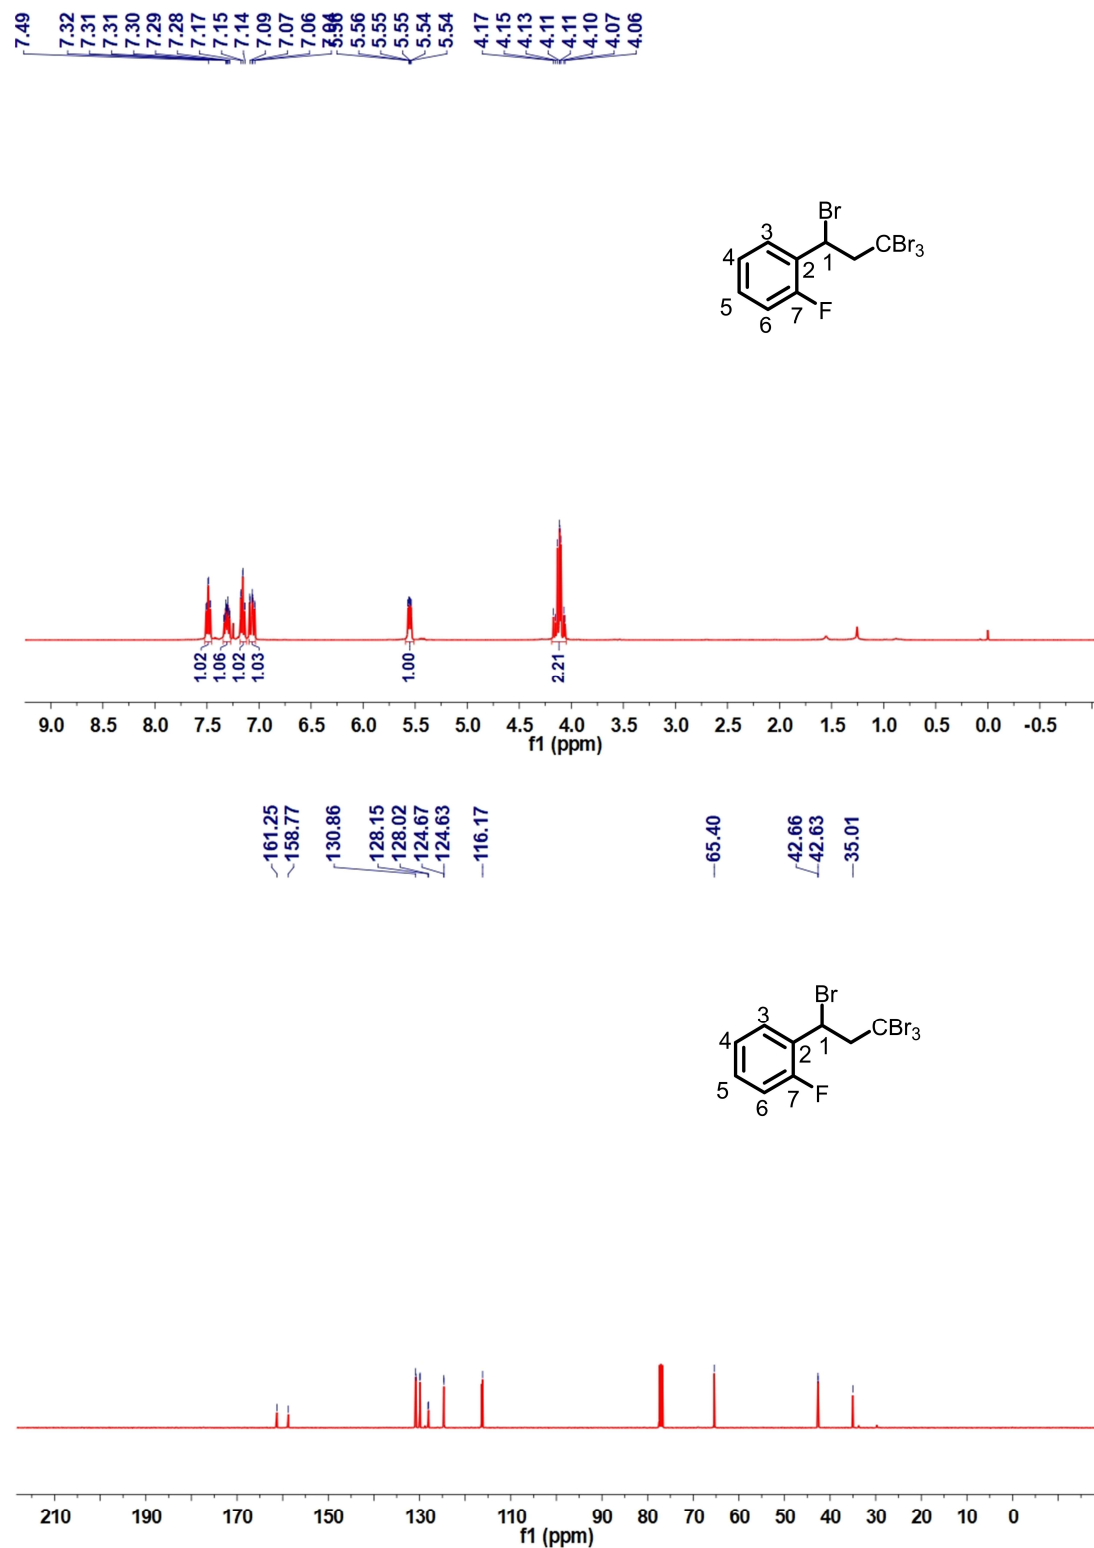

-114.34

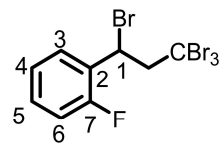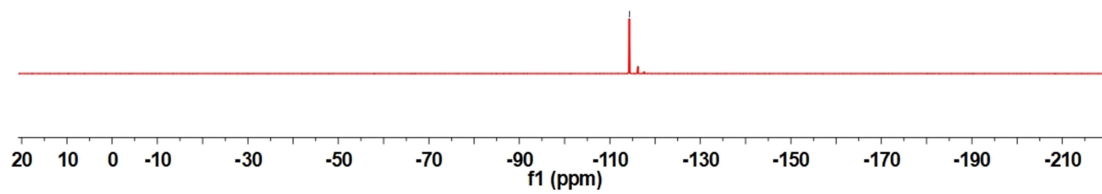

**Fig. S32.** The  $^1\text{H}$  (400 MHz) and  $^{13}\text{C}\{^1\text{H}\}$  (101 MHz) NMR spectra for 2-(1,3,3,3-tetrabromopropyl)pyridine (**6j**) in  $\text{CDCl}_3$ .

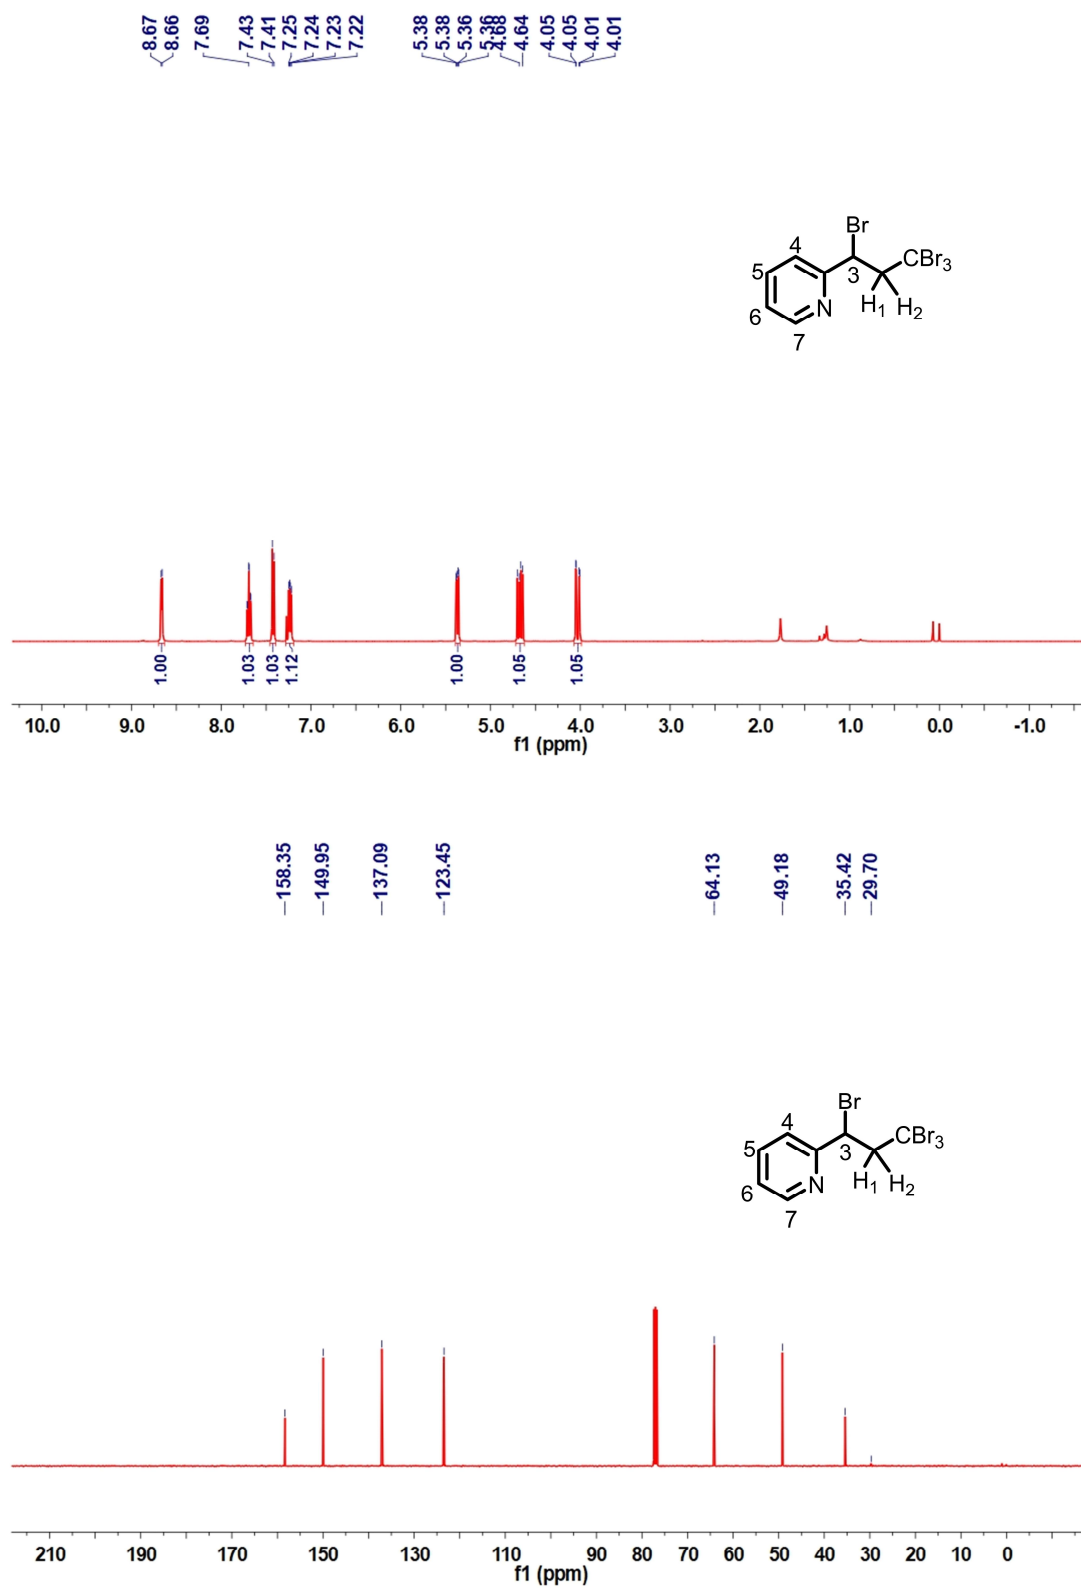

**Fig. S33.** The  $^1\text{H}$  (400 MHz) and  $^{13}\text{C}\{^1\text{H}\}$  (101 MHz) NMR spectra for (1-bromo-3,3,3-trichloropropyl)benzene (**5k**) in  $\text{CDCl}_3$ .

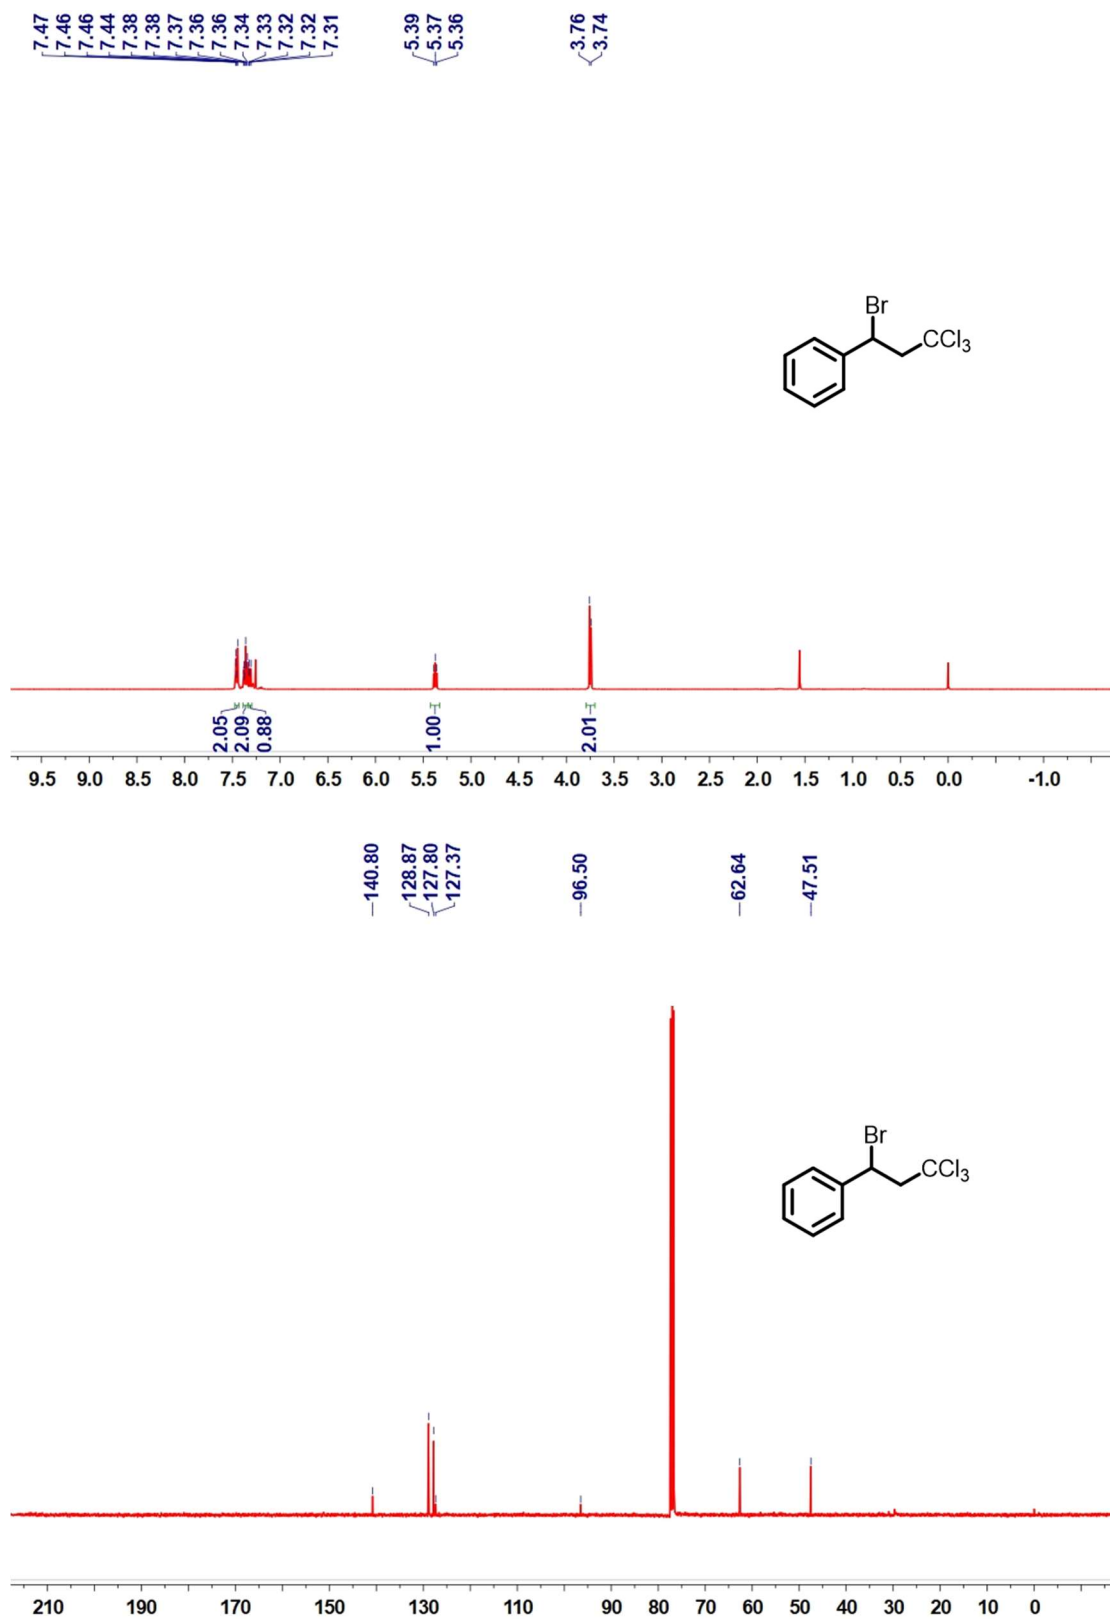

**Fig. S34.** The  $^1\text{H}$  (400 MHz) and  $^{13}\text{C}\{^1\text{H}\}$  (101 MHz) NMR spectra for (1,3,3-triiodopropyl)benzene (**5I**) in  $\text{CDCl}_3$ .

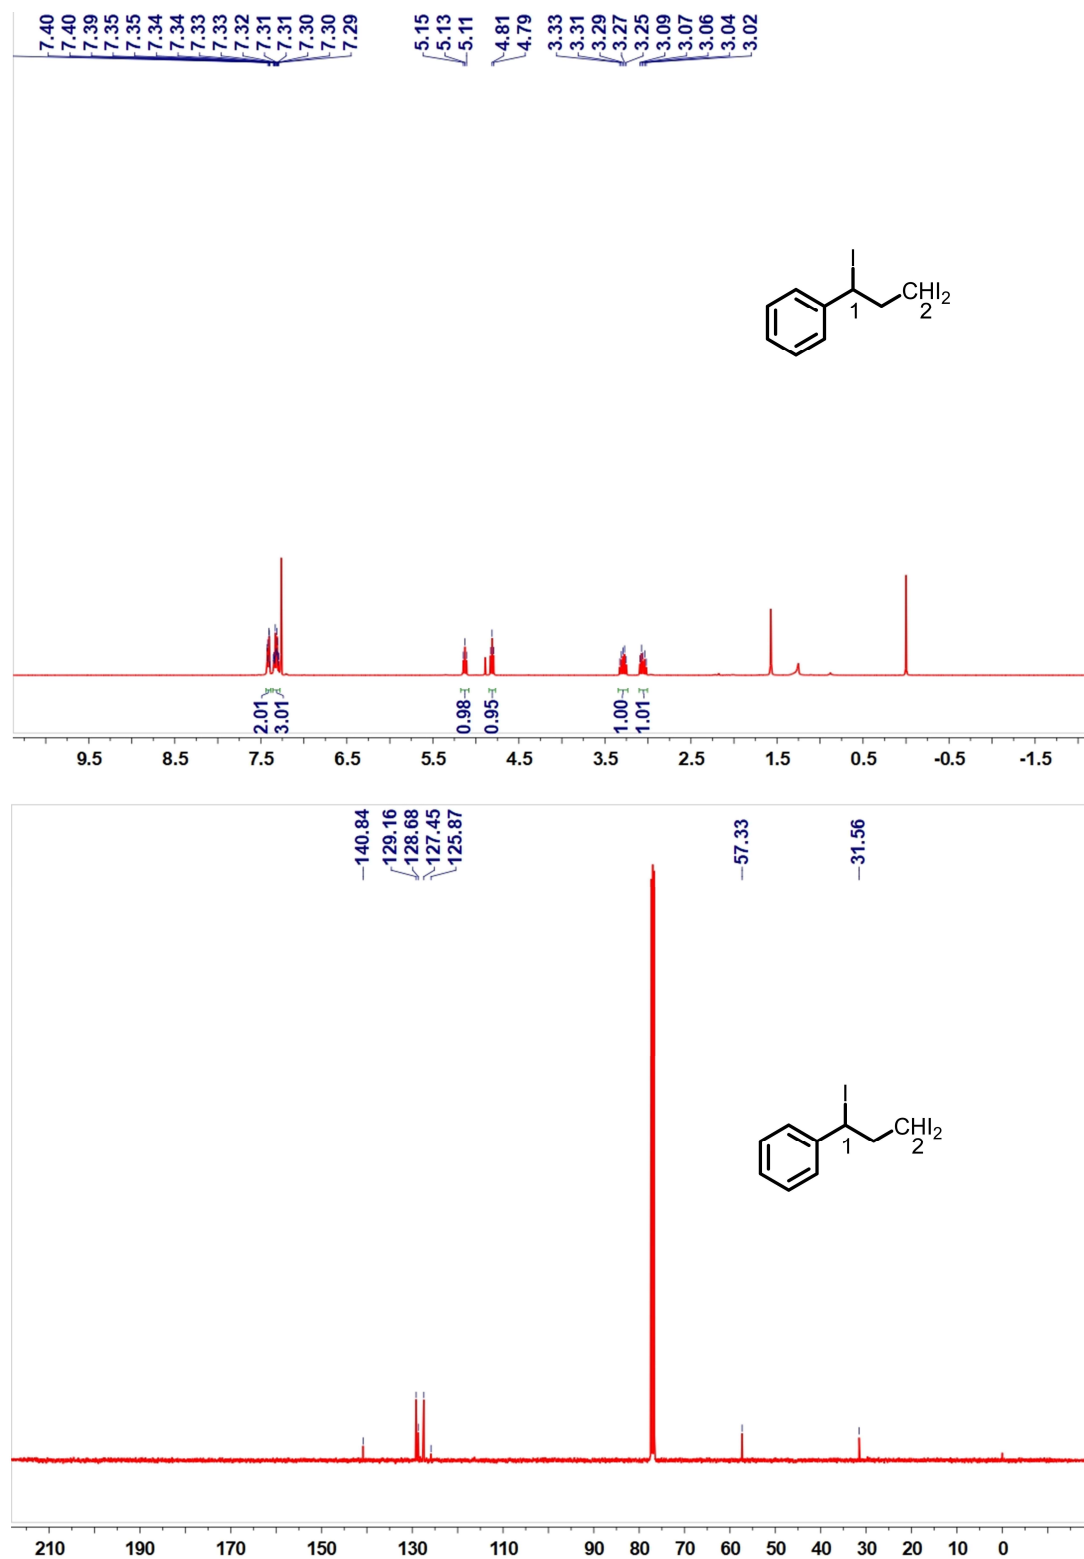

**Fig. S35.** The  $^1\text{H}$  (600 MHz) and  $^{13}\text{C}\{^1\text{H}\}$  (151 MHz) NMR spectra for (*E*)-(1,1,1,6-tetrabromohex-3-en-3-yl)benzene (**6a**) in  $\text{CDCl}_3$ .

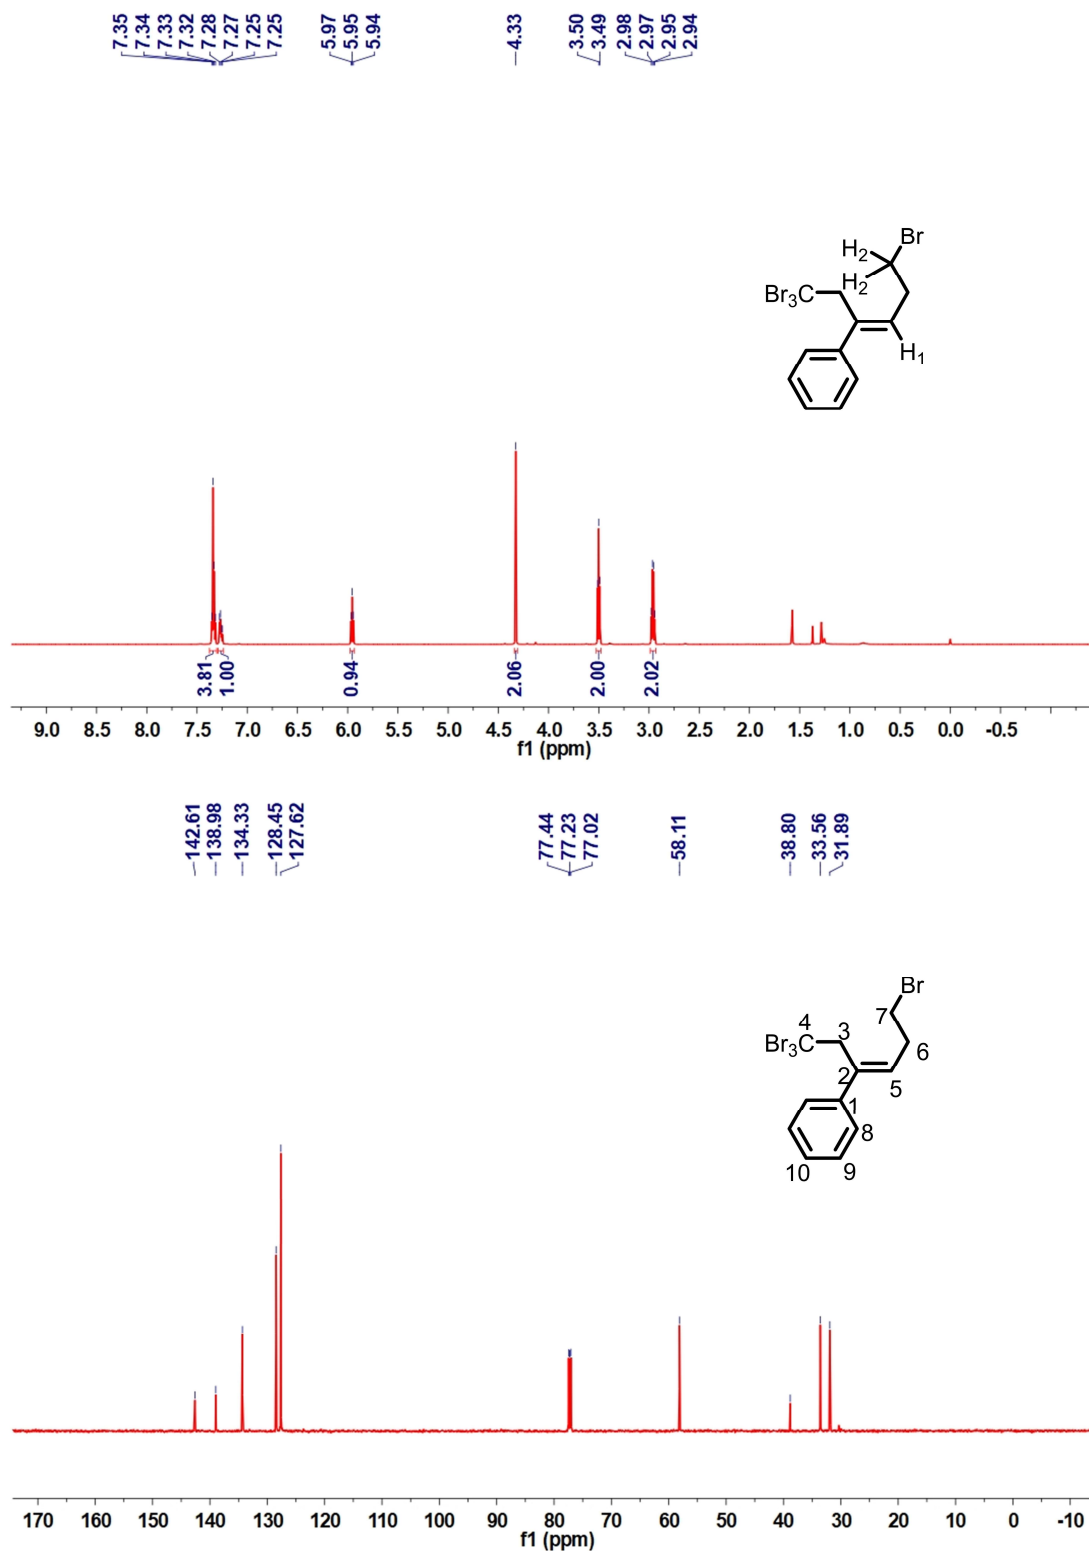

**Fig. S36.** The  $^{13}\text{C}\{^1\text{H}\}$ -NNE NMR spectra for (*E*)-(1,1,1,6-tetrabromohex-3-en-3-yl)benzene (**6a**) in  $\text{CDCl}_3$ .

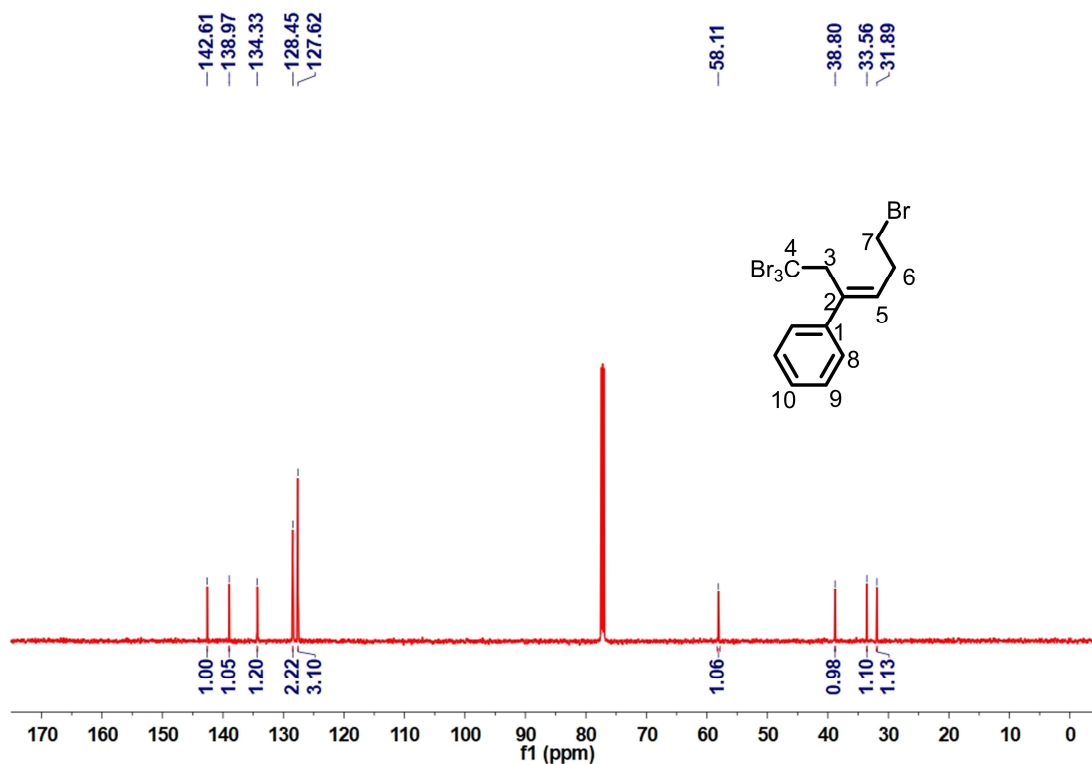

**Fig. S37.** The  $^{13}\text{C}\{^1\text{H}\}$ -DEPT NMR spectra for (*E*)-(1,1,1,6-tetrabromohex-3-en-3-yl)benzene (**6a**) in  $\text{CDCl}_3$ .

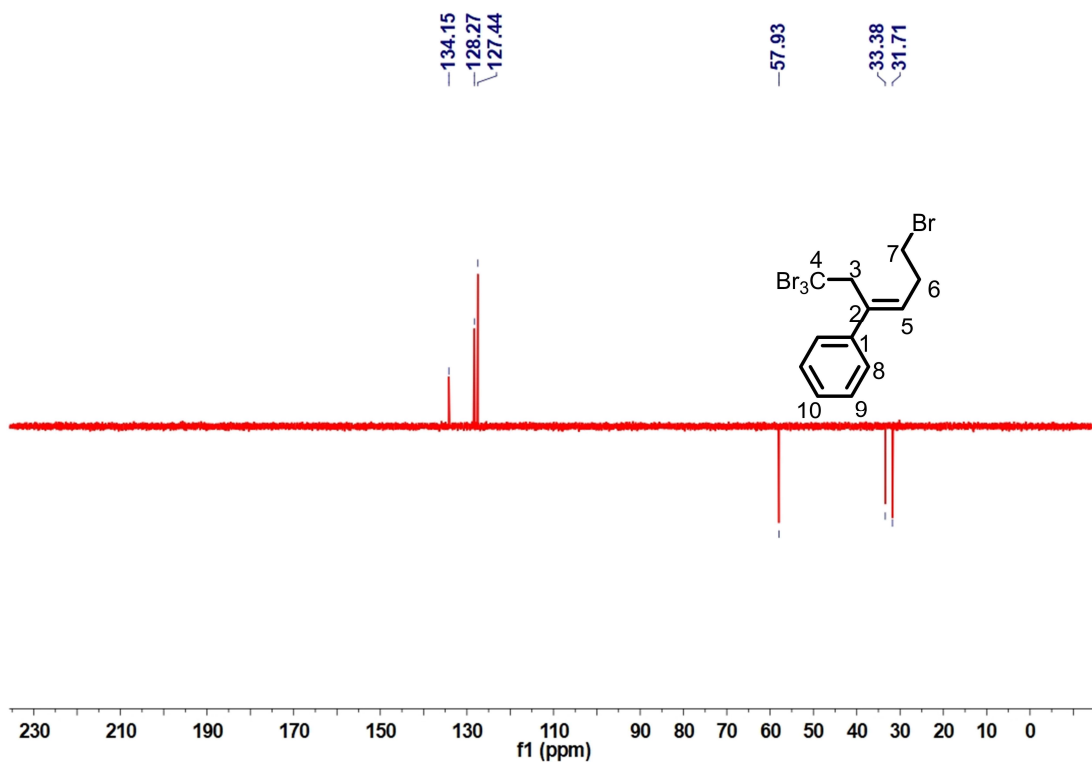

**Fig. S38.** The  $^{13}\text{C}$ - $^1\text{H}$  COSY NMR spectra for (*E*)-(1,1,1,6-tetrabromohex-3-en-3-yl)benzene (**6a**) in  $\text{CDCl}_3$ .

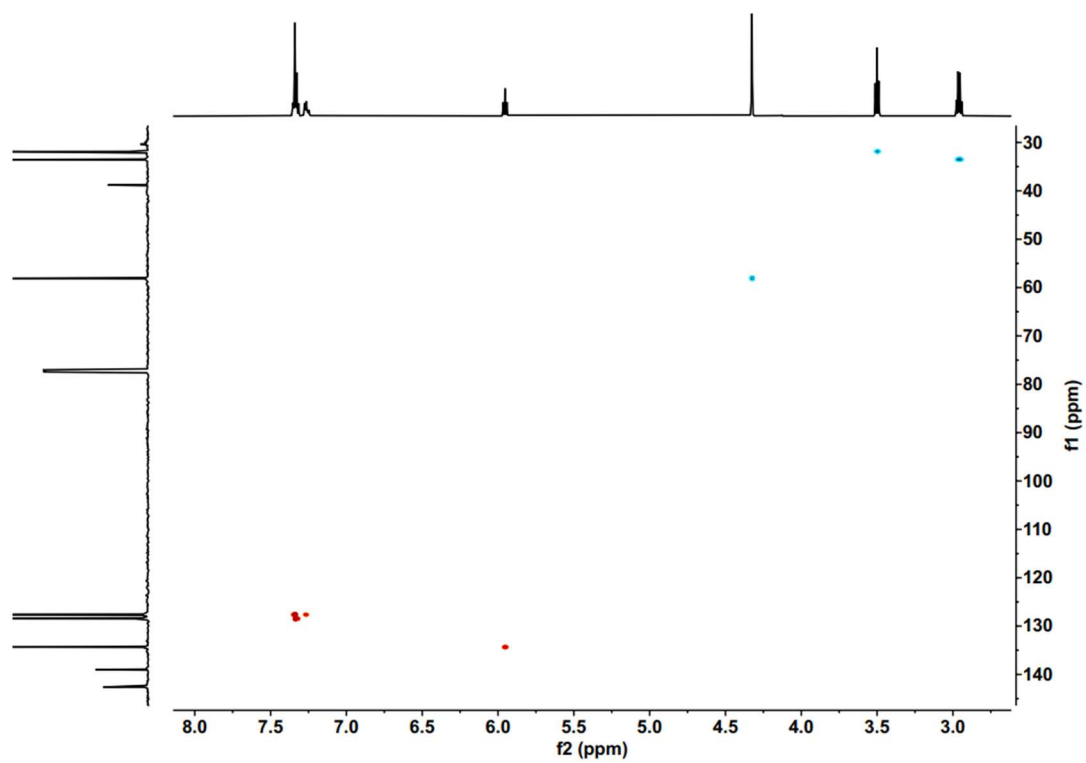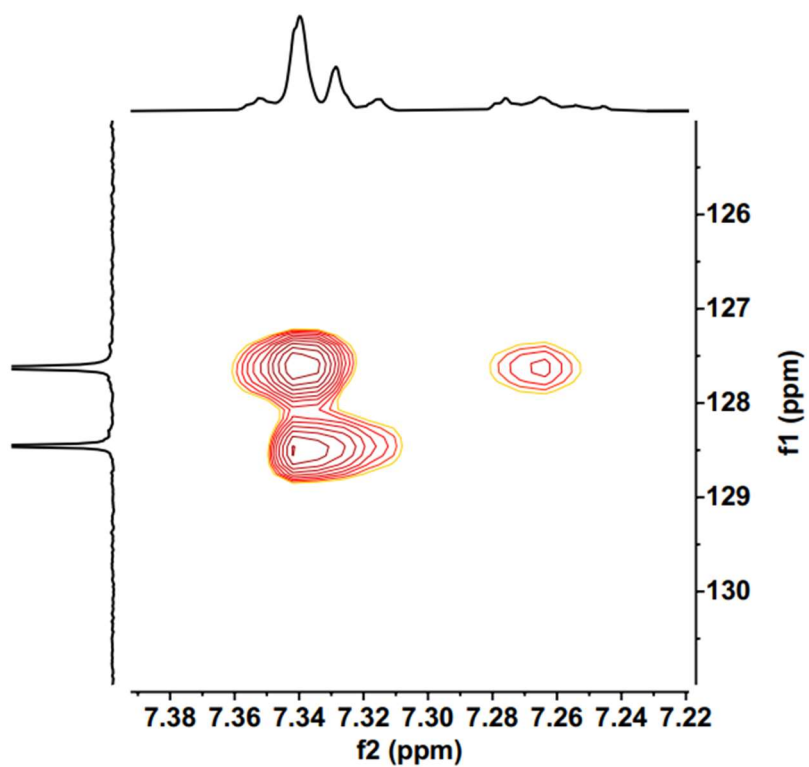



**Fig. S39.** The  $^1\text{H}$ - $^1\text{H}$  NOSEY NMR spectra for (*E*)-(1,1,1,6-tetrabromohex-3-en-3-yl)benzene (**6a**) in  $\text{CDCl}_3$ .

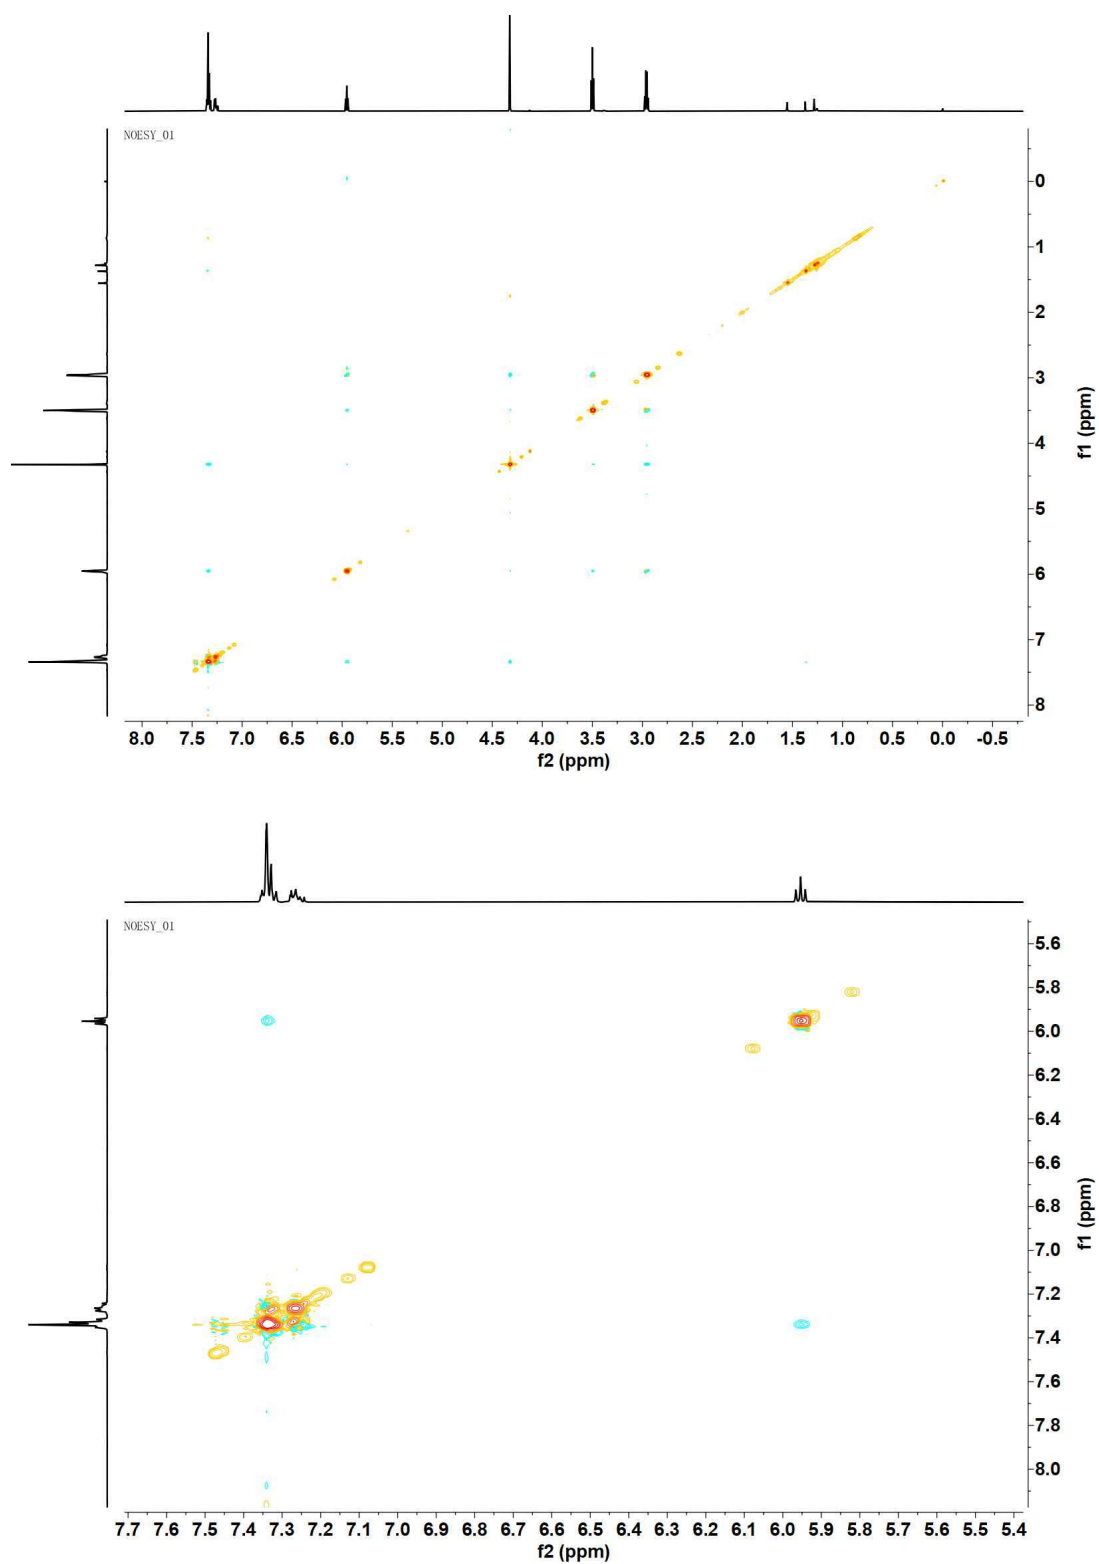

**Fig. S40.** The  $^1\text{H}$  (600 MHz) and  $^{13}\text{C}\{^1\text{H}\}$  (151 MHz) NMR spectra for (*Z*)-(1,1,1,6-tetrabromohex-3-en-3-yl)benzene (**6b**) in  $\text{CDCl}_3$ .

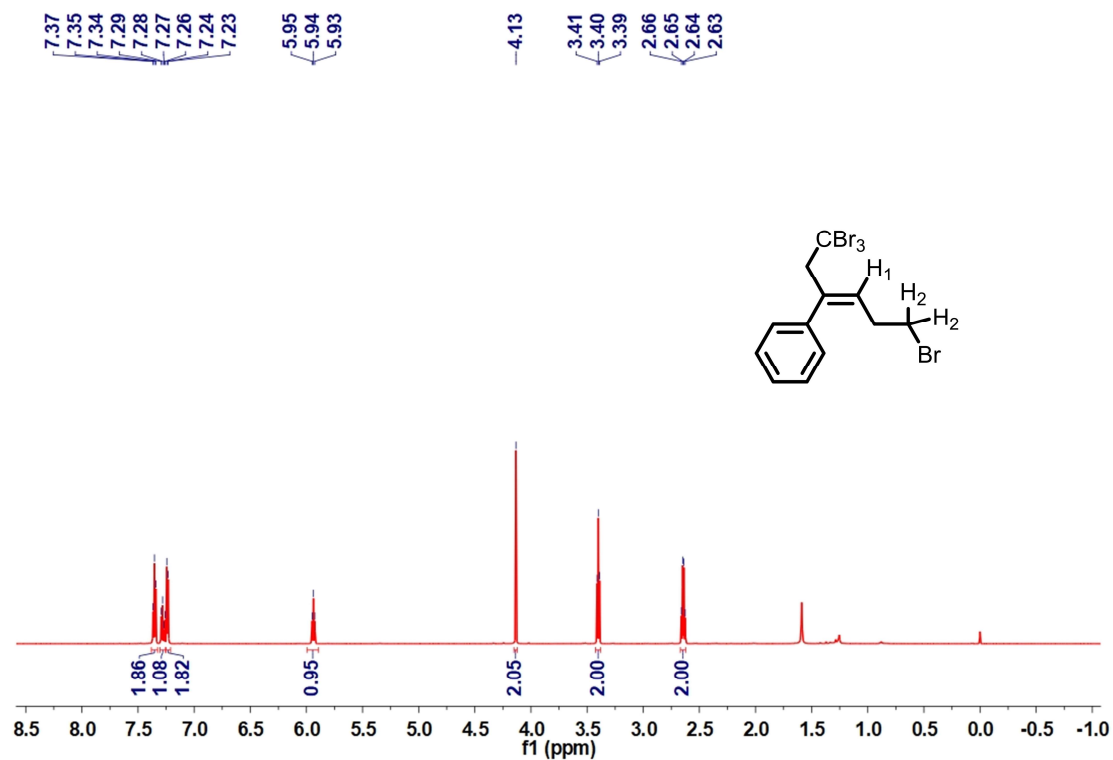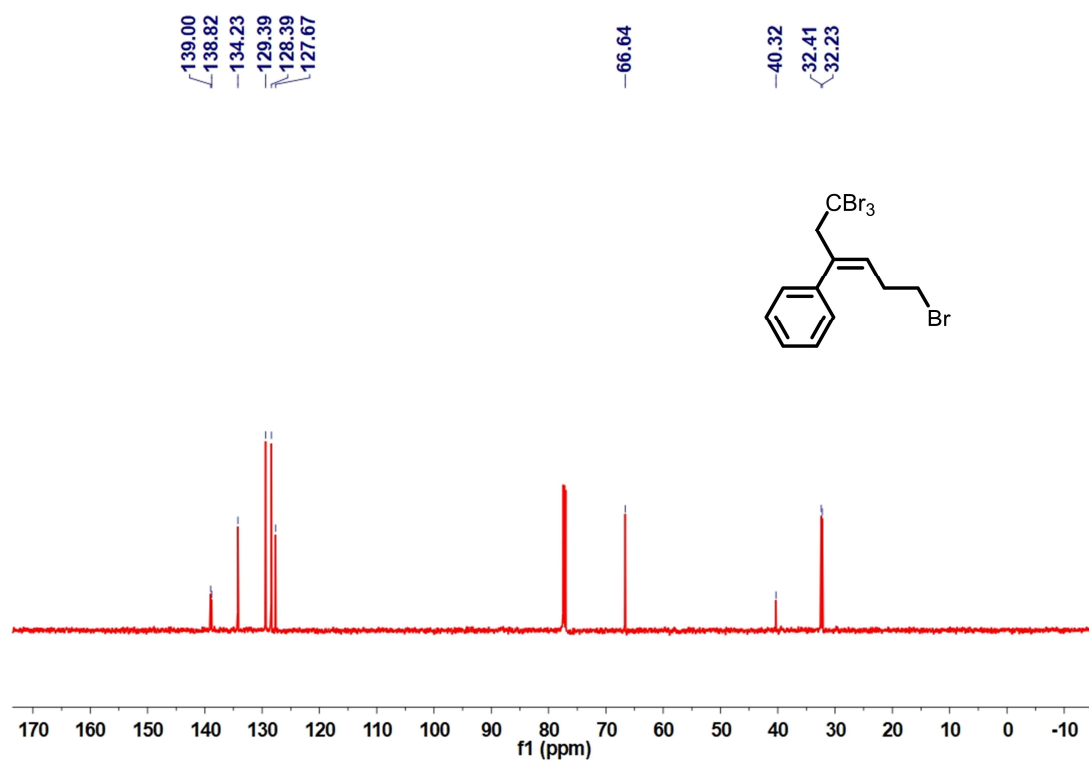

**Fig. S41.** The  $^1\text{H}$ - $^1\text{H}$  NOSEY NMR spectra for (*Z*)-(1,1,1,6-tetrabromohex-3-en-3-yl)benzene (**6b**) in  $\text{CDCl}_3$ .

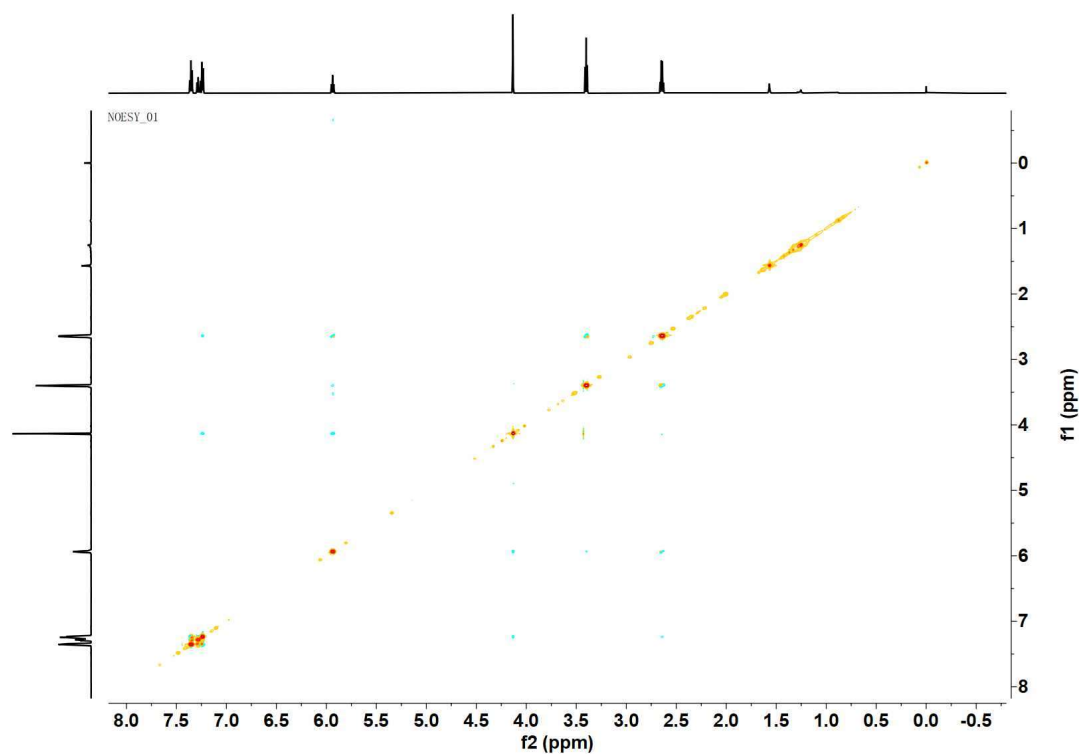

Supplement: d3dt00321c1.pdf [file d3dt00321c1.pdf]
